# Supplementary material for: MBNL1 alternative splicing isoforms play opposing roles in cancer
Source: PubMed Central journal article supplement (PMC6238595; doi:10.26508/lsa.201800157), 2018-09-07

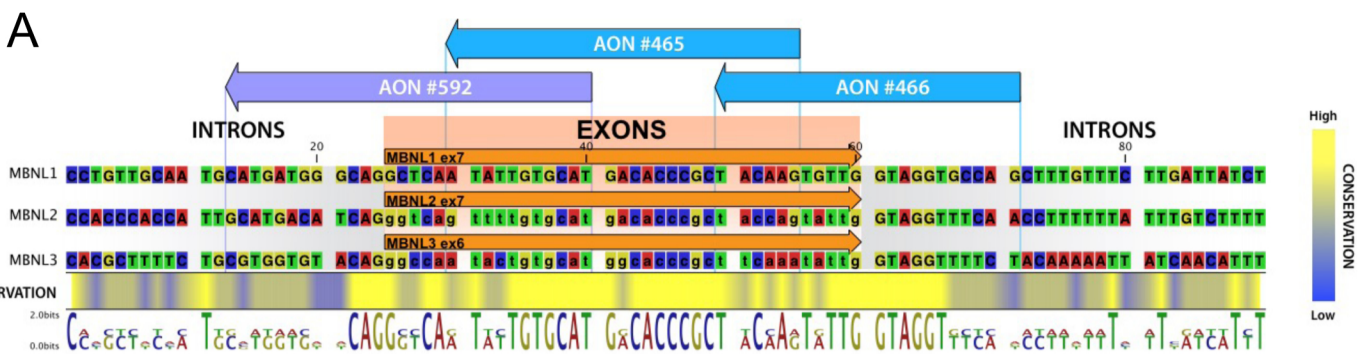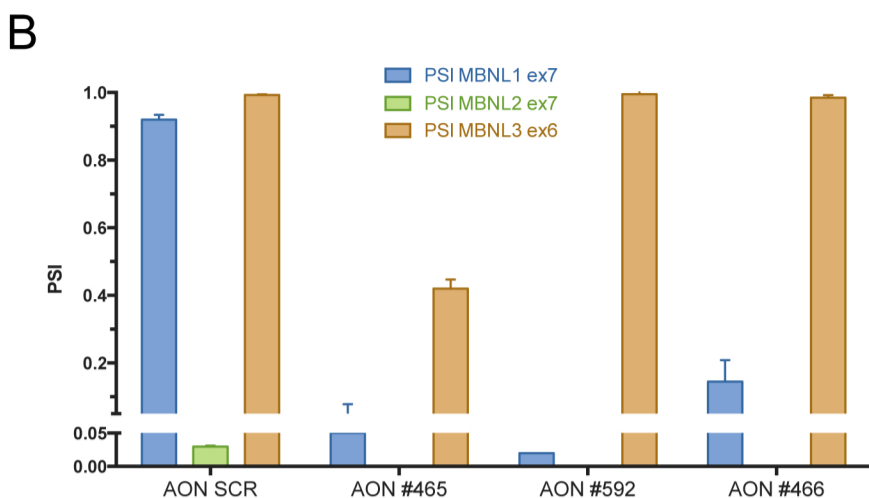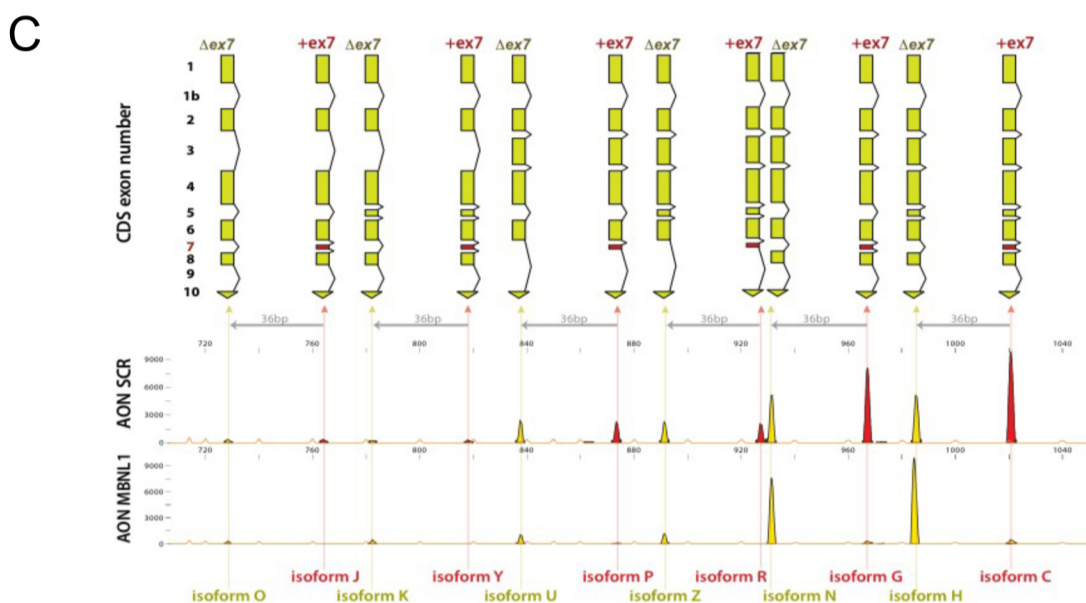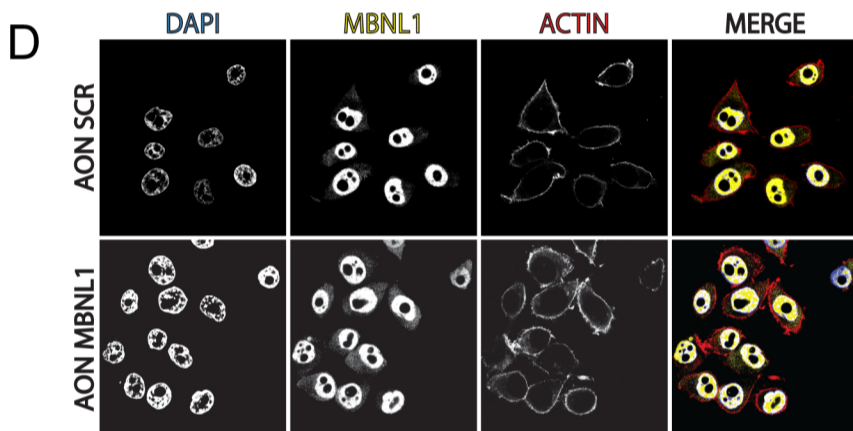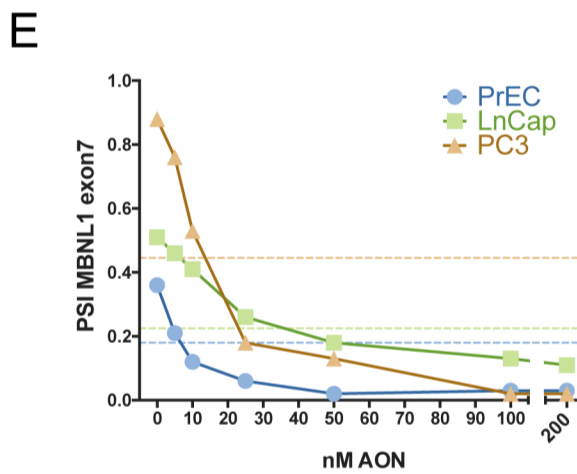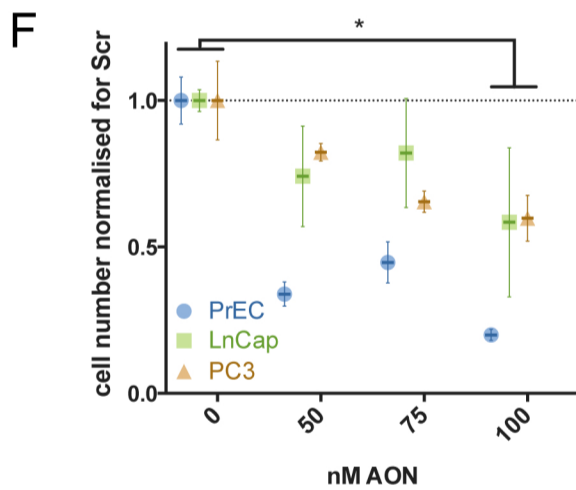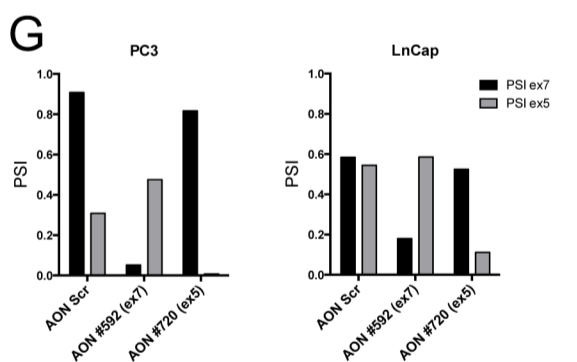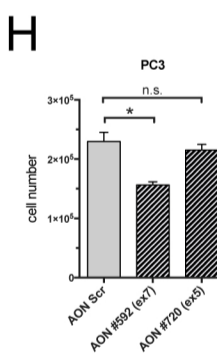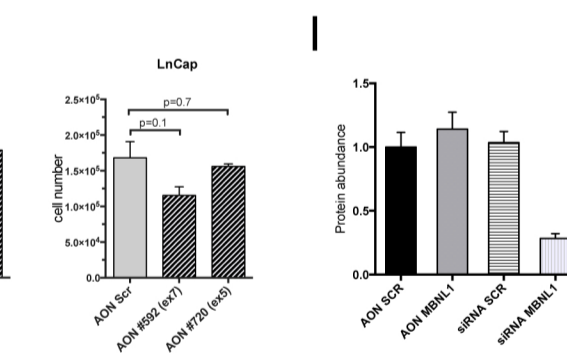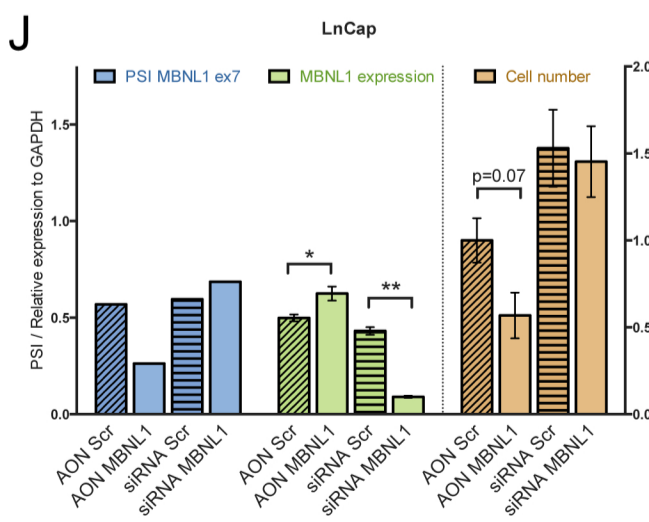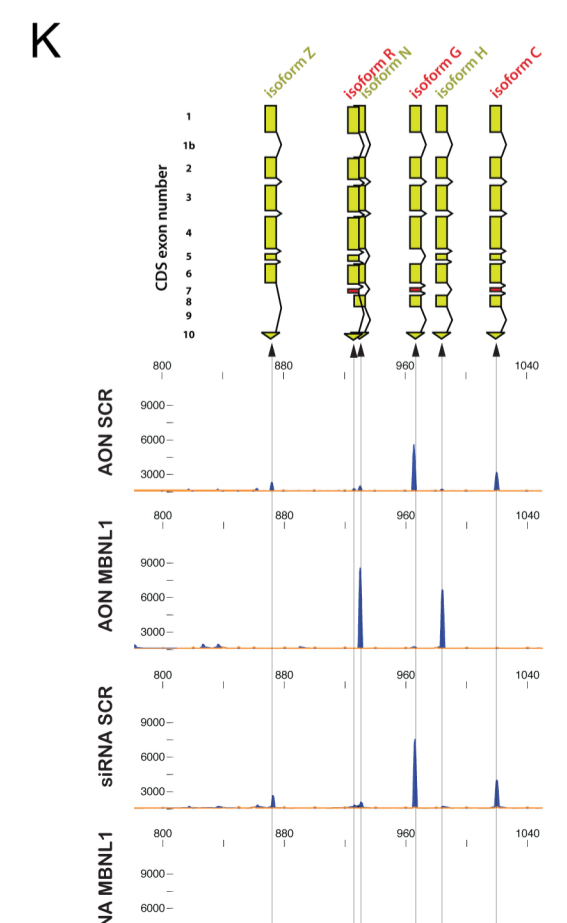

Supplement: LSA-2018-00157_FigS3.pdf [file LSA-2018-00157_FigS3.pdf]
