# Supplementary material for: MBNL1 alternative splicing isoforms play opposing roles in cancer
Source: Life Sci Alliance. 2018 Sep 7;1(5):e201800157. doi: 10.26508/lsa.201800157 (PMC6238595; doi:10.26508/lsa.201800157)
Supplement: Supplementary file 2 [file LSA-2018-00157_TableS2.xlsx]

## Sheet: Table S2 Co-IP
Blot images were captured using G:Box Chemi XR5 and the signals were quantified with GeneTools software (Syngene).													I
													m-7, g-7	Track A1
														Number	Mol. weight	Height	Raw vol.
	I	II	III	av	sd	t-test								1	0	633.72	268817			0.188317
m-7, g-7	0.188317	0.405039	0	0.197785	0.202686	0.00237034			m: mCherry/MBNL1				m-7, g+7	Track A2
m-7, g+7	0.146966	0.208889	0.0358626	0.130572	0.0876702	6.73959e-05			g: GFP/MBNL1					Number	Mol. weight	Height	Raw vol.
m+7, g-7	0.309256	0.247621	0.368639	0.308506	0.0605123	3.84392e-05								1	0	546.54	209790			0.146966
m+7, g+7	1	1	1	1	0	2.43585e-06							m+7, g-7	Track A3
														Number	Mol. weight	Height	Raw vol.
														1	0	1242.25	441456			0.309256
													m+7, g+7	Track A4
														Number	Mol. weight	Height	Raw vol.
														1	0	1773.72	651426	1.42747e+06		1
														2	0	2153.92	776048
													II
													m-7, g-7	Track B2
														Number	Mol. weight	Height	Raw vol.
														1	0	1967.44	844485			0.405039
													m-7, g+7	Track B3
														Number	Mol. weight	Height	Raw vol.
														1	0	944.562	435522			0.208889
													m+7, g-7	Track B4
														Number	Mol. weight	Height	Raw vol.
														1	0	1251.45	516278			0.247621
													m+7, g+7	Track B5
														Number	Mol. weight	Height	Raw vol.
														1	0	2086.07	712970	2.08495e+06		1
														2	0	3063.95	1.37198e+06
													III
													m-7, g-7	Track 1
														Number	Mol. weight	Height	Raw vol.
														1	0	0	0			0
													m-7, g+7	Track 2
														Number	Mol. weight	Height	Raw vol.
														1	0	1766.62	1.04936e+06			0.0358626
													m+7, g-7	Track 3
														Number	Mol. weight	Height	Raw vol.
														1	0	18070.5	10786572			0.368639
													m+7, g+7	Track 4
														Number	Mol. weight	Height	Raw vol.
														1	0	6937.74	3.78587e+06	2.92605e+07		1
														2	0	36971.1	25474656
