# Supplementary material for: MBNL1 alternative splicing isoforms play opposing roles in cancer
Source: Life Sci Alliance. 2018 Sep 7;1(5):e201800157. doi: 10.26508/lsa.201800157 (PMC6238595; doi:10.26508/lsa.201800157)
Supplement: Supplementary file 4 [file LSA-2018-00157_TableS3.xlsx]

## Sheet: Table S3 RNAseq diff expressed
Differentially expressed genes upon AON MBNL1 transfection in PC3 cells. FPKM values of the genes with -1>log2 fold change>1 between AON Scr and AON MBNL1 treated cells. Only statistically significant events are shown
ENSG name	Gene	AON	AON	log2 fold	pvalue	qvalue
		SCR	MBNL1	change
ENSG00000200972	RNU5A-8P	743.62	254.92	-1.54	5e-05	0.00174
ENSG00000116127	ALMS1	3.63	1.32	-1.46	5e-05	0.00174
ENSG00000163781	TOPBP1	13.37	4.99	-1.42	5e-05	0.00174
ENSG00000131747	TOP2A	24.88	9.31	-1.42	5e-05	0.00174
ENSG00000104093	DMXL2	3.24	1.21	-1.42	5e-05	0.00174
ENSG00000152582	SPEF2	1.08	0.41	-1.38	5e-05	0.00174
ENSG00000136628	EPRS	99.93	38.97	-1.36	5e-05	0.00174
ENSG00000163808	KIF15	6	2.42	-1.31	5e-05	0.00174
ENSG00000198554	WDHD1	22.96	9.26	-1.31	5e-05	0.00174
ENSG00000233404	FLJ20373	10.08	4.1	-1.3	5e-05	0.00174
ENSG00000173275	ZNF449	5.24	2.18	-1.26	5e-05	0.00174
ENSG00000138246	DNAJC13	7.83	3.26	-1.26	5e-05	0.00174
ENSG00000187134	AKR1C1	10.69	4.45	-1.26	5e-05	0.00174
ENSG00000213430	HSPD1P1	5.3	2.22	-1.25	5e-05	0.00174
ENSG00000175265	GOLGA8A	9.14	3.84	-1.25	5e-05	0.00174
ENSG00000215252	GOLGA8B	9.14	3.84	-1.25	5e-05	0.00174
ENSG00000115524	SF3B1	69.89	29.51	-1.24	5e-05	0.00174
ENSG00000175054	ATR	5.61	2.42	-1.21	5e-05	0.00174
ENSG00000185009	AP3M1	54.59	23.76	-1.2	5e-05	0.00174
ENSG00000148773	MKI67	4.56	1.99	-1.19	5e-05	0.00174
ENSG00000110723	EXPH5	5.9	2.59	-1.19	5e-05	0.00174
ENSG00000146802	TMEM168	1.15	0.51	-1.18	5e-05	0.00174
ENSG00000137992	DBT	8.33	3.67	-1.18	5e-05	0.00174
ENSG00000167637	ZNF283	1.9	0.84	-1.18	5e-05	0.00174
ENSG00000233280	FLJ60082	2.3	1.02	-1.17	5e-05	0.00174
ENSG00000164989	CCDC171	1.76	0.79	-1.17	5e-05	0.00174
ENSG00000185875	THNSL1	4.22	1.89	-1.16	5e-05	0.00174
ENSG00000126787	DLGAP5	25.93	11.6	-1.16	5e-05	0.00174
ENSG00000197299	BLM	5.26	2.37	-1.15	5e-05	0.00174
ENSG00000117010	ZNF684	1.68	0.76	-1.15	0.0001	0.00308
ENSG00000119969	HELLS	9.19	4.19	-1.13	5e-05	0.00174
ENSG00000244332	RP11-119K6.6	9.19	4.19	-1.13	5e-05	0.00174
ENSG00000114346	ECT2	39.18	17.88	-1.13	5e-05	0.00174
ENSG00000072274	TFRC	167.25	76.31	-1.13	5e-05	0.00174
ENSG00000124486	USP9X	20.57	9.4	-1.13	5e-05	0.00174
ENSG00000236901	MIR600HG	14.2	6.49	-1.13	5e-05	0.00174
ENSG00000165209	STRBP	14.2	6.49	-1.13	5e-05	0.00174
ENSG00000077097	TOP2B	29.75	13.6	-1.13	5e-05	0.00174
ENSG00000078674	PCM1	10.87	4.97	-1.13	5e-05	0.00174
ENSG00000174371	EXO1	16.97	7.78	-1.13	5e-05	0.00174
ENSG00000146085	MUT	3.85	1.77	-1.12	5e-05	0.00174
ENSG00000047188	YTHDC2	8.07	3.71	-1.12	5e-05	0.00174
ENSG00000163629	PTPN13	5.18	2.38	-1.12	5e-05	0.00174
ENSG00000177485	ZBTB33	8.77	4.05	-1.11	5e-05	0.00174
ENSG00000165392	WRN	5.76	2.67	-1.11	5e-05	0.00174
ENSG00000253729	PRKDC	41.63	19.33	-1.11	5e-05	0.00174
ENSG00000109805	NCAPG	12.28	5.72	-1.1	0.00025	0.00649
ENSG00000133706	LARS	117.58	54.81	-1.1	5e-05	0.00174
ENSG00000117724	CENPF	10.11	4.72	-1.1	5e-05	0.00174
ENSG00000003989	SLC7A2	10.46	4.9	-1.09	5e-05	0.00174
ENSG00000153201	RANBP2	8.62	4.04	-1.09	5e-05	0.00174
ENSG00000113790	EHHADH	4.82	2.26	-1.09	5e-05	0.00174
ENSG00000108582	CPD	16.06	7.56	-1.09	5e-05	0.00174
ENSG00000198677	TTC37	16.32	7.69	-1.09	5e-05	0.00174
ENSG00000074695	LMAN1	53.41	25.25	-1.08	5e-05	0.00174
ENSG00000178904	DPY19L3	2.09	0.99	-1.07	5e-05	0.00174
ENSG00000125885	MCM8	8.62	4.1	-1.07	5e-05	0.00174
ENSG00000257576	RP11-153M3.1	2.3	1.09	-1.07	5e-05	0.00174
ENSG00000129003	VPS13C	4.29	2.04	-1.07	5e-05	0.00174
ENSG00000137812	KNL1	5.75	2.74	-1.07	5e-05	0.00174
ENSG00000011426	ANLN	23.43	11.19	-1.07	5e-05	0.00174
ENSG00000135373	EHF	2.55	1.22	-1.06	0.00025	0.00649
ENSG00000139697	SBNO1	18.23	8.72	-1.06	5e-05	0.00174
ENSG00000009307	CSDE1	163.41	78.27	-1.06	5e-05	0.00174
ENSG00000012048	BRCA1	4.91	2.35	-1.06	0.0001	0.00308
ENSG00000064102	ASUN	101.31	48.61	-1.06	0.00015	0.0043
ENSG00000128059	PPAT	22.89	10.99	-1.06	5e-05	0.00174
ENSG00000138095	LRPPRC	80.49	38.67	-1.06	5e-05	0.00174
ENSG00000104164	BLOC1S6	12.42	5.98	-1.06	5e-05	0.00174
ENSG00000158528	PPP1R9A	2.99	1.44	-1.05	0.0001	0.00308
ENSG00000213033	AURKAPS1	10.71	5.17	-1.05	0.00075	0.0145
ENSG00000118873	RAB3GAP2	10.71	5.17	-1.05	0.00075	0.0145
ENSG00000056277	ZNF280C	2.7	1.31	-1.05	5e-05	0.00174
ENSG00000137942	FNBP1L	9.24	4.47	-1.05	5e-05	0.00174
ENSG00000162402	USP24	12.76	6.17	-1.05	5e-05	0.00174
ENSG00000137040	RANBP6	10.74	5.19	-1.05	5e-05	0.00174
ENSG00000187325	TAF9B	11.52	5.57	-1.05	5e-05	0.00174
ENSG00000125676	THOC2	25.73	12.46	-1.05	0.0002	0.00541
ENSG00000198961	PJA2	10.81	5.25	-1.04	5e-05	0.00174
ENSG00000138688	KIAA1109	3.3	1.6	-1.04	0.00035	0.00839
ENSG00000134313	KIDINS220	6.76	3.29	-1.04	5e-05	0.00174
ENSG00000114416	FXR1	68.62	33.48	-1.04	5e-05	0.00174
ENSG00000156802	ATAD2	19.79	9.66	-1.03	5e-05	0.00174
ENSG00000156970	BUB1B	36.32	17.73	-1.03	5e-05	0.00174
ENSG00000259288	BUB1B-PAK6	36.32	17.73	-1.03	5e-05	0.00174
ENSG00000137843	PAK6	36.32	17.73	-1.03	5e-05	0.00174
ENSG00000131269	ABCB7	25.12	12.29	-1.03	5e-05	0.00174
ENSG00000147874	HAUS6	14.42	7.06	-1.03	0.00075	0.0145
ENSG00000176105	YES1	65.45	32.07	-1.03	5e-05	0.00174
ENSG00000140386	SCAPER	3.02	1.48	-1.02	5e-05	0.00174
ENSG00000014824	SLC30A9	15.84	7.8	-1.02	5e-05	0.00174
ENSG00000153914	SREK1	6.94	3.41	-1.02	0.00055	0.0117
ENSG00000092853	CLSPN	5.4	2.66	-1.02	0.00025	0.00649
ENSG00000196116	TDRD7	1.03	0.51	-1.02	5e-05	0.00174
ENSG00000047315	POLR2B	38.86	19.18	-1.02	5e-05	0.00174
ENSG00000198826	ARHGAP11A	18.64	9.2	-1.02	5e-05	0.00174
ENSG00000108848	LUC7L3	32.93	16.27	-1.02	5e-05	0.00174
ENSG00000071794	HLTF	31.28	15.46	-1.02	5e-05	0.00174
ENSG00000139116	KIF21A	15.84	7.84	-1.01	0.00015	0.0043
ENSG00000120800	UTP20	10.11	5.01	-1.01	5e-05	0.00174
ENSG00000103540	CCP110	1.95	0.97	-1.01	5e-05	0.00174
ENSG00000124429	POF1B	1.04	0.51	-1.01	5e-05	0.00174
ENSG00000148700	ADD3	9.73	4.84	-1.01	0.0006	0.0124
ENSG00000164323	CFAP97	15.44	7.67	-1.01	0.00195	0.0286
ENSG00000111247	RAD51AP1	12.83	6.38	-1.01	5e-05	0.00174
ENSG00000131263	RLIM	22.6	11.27	-1	5e-05	0.00174
ENSG00000142731	PLK4	7.8	3.89	-1	0.00175	0.0264
ENSG00000066654	THUMPD1	11.21	5.59	-1	5e-05	0.00174
ENSG00000214870	AC004540.5	0.68	1.36	1	0.00125	0.0209
ENSG00000233654	AC093388.3	0.88	1.76	1.01	0.00405	0.0478
ENSG00000120899	PTK2B	1.29	2.62	1.02	0.00115	0.0196
ENSG00000125845	BMP2	1.02	2.08	1.03	5e-05	0.00174
ENSG00000057149	SERPINB3	0.69	1.4	1.03	5e-05	0.00174
ENSG00000133636	NTS	2.42	4.93	1.03	5e-05	0.00174
ENSG00000168079	SCARA5	0.55	1.13	1.03	5e-05	0.00174
ENSG00000213658	LAT	0.52	1.06	1.03	5e-05	0.00174
ENSG00000178038	ALS2CL	1.53	3.14	1.04	5e-05	0.00174
ENSG00000168490	PHYHIP	0.58	1.18	1.04	0.00375	0.0456
ENSG00000156804	FBXO32	18.17	37.49	1.05	5e-05	0.00174
ENSG00000161638	ITGA5	12.55	25.97	1.05	5e-05	0.00174
ENSG00000128510	CPA4	1.67	3.48	1.06	0.0004	0.00913
ENSG00000182795	C1orf116	1.38	2.88	1.06	5e-05	0.00174
ENSG00000249306	LINC01411	1.13	2.37	1.06	5e-05	0.00174
ENSG00000128218	VPREB3	2.38	4.98	1.07	5e-05	0.00174
ENSG00000165272	AQP3	0.7	1.48	1.07	5e-05	0.00174
ENSG00000258717	RP11-566J3.2	0.76	1.61	1.08	0.0001	0.00308
ENSG00000257261	RP11-96H19.1	4.67	9.91	1.08	0.00075	0.0145
ENSG00000177606	JUN	11.97	25.44	1.09	5e-05	0.00174
ENSG00000073737	DHRS9	10.12	21.58	1.09	5e-05	0.00174
ENSG00000164442	CITED2	13.05	28.05	1.1	5e-05	0.00174
ENSG00000233621	LINC01137	0.86	1.86	1.11	5e-05	0.00174
ENSG00000245954	RP11-18H21.1	0.48	1.05	1.12	0.0011	0.019
ENSG00000117407	ARTN	0.96	2.08	1.12	5e-05	0.00174
ENSG00000227036	LINC00511	1.52	3.32	1.12	5e-05	0.00174
ENSG00000196196	HRCT1	1.37	3	1.13	5e-05	0.00174
ENSG00000166147	FBN1	0.71	1.55	1.14	0.00225	0.0315
ENSG00000076356	PLXNA2	0.93	2.05	1.14	0.0028	0.0366
ENSG00000182866	LCK	0.6	1.33	1.15	5e-05	0.00174
ENSG00000148346	LCN2	1.03	2.29	1.16	5e-05	0.00174
ENSG00000065534	MYLK	0.54	1.19	1.16	0.00205	0.0296
ENSG00000100053	CRYBB3	0.64	1.43	1.16	0.0001	0.00308
ENSG00000081041	CXCL2	2.19	4.9	1.16	5e-05	0.00174
ENSG00000236532	AL035610.2	1.29	2.91	1.17	0.00075	0.0145
ENSG00000143878	RHOB	4.38	10.06	1.2	5e-05	0.00174
ENSG00000244176	RP11-810P12.1	0.93	2.14	1.21	5e-05	0.00174
ENSG00000242407	CTD-2377D24.4	0.56	1.31	1.21	0.00115	0.0196
ENSG00000258929	-	0.85	2	1.22	5e-05	0.00174
ENSG00000214900	LINC01588	0.85	2	1.22	5e-05	0.00174
ENSG00000151117	TMEM86A	0.48	1.12	1.23	5e-05	0.00174
ENSG00000105289	TJP3	1.25	2.94	1.23	0.0022	0.031
ENSG00000165507	C10orf10	1.4	3.31	1.24	5e-05	0.00174
ENSG00000188126	MYO15B	0.95	2.24	1.24	5e-05	0.00174
ENSG00000203804	ADAMTSL4-AS1	0.64	1.53	1.24	0.0008	0.0152
ENSG00000204839	MROH6	1.68	3.99	1.25	0.0002	0.00541
ENSG00000212195	U3	69.85	166.15	1.25	5e-05	0.00174
ENSG00000206737	RNVU1-18	6.18	14.72	1.25	0.004	0.0475
ENSG00000143369	ECM1	1.36	3.28	1.27	5e-05	0.00174
ENSG00000163874	ZC3H12A	4.18	10.12	1.27	5e-05	0.00174
ENSG00000144655	CSRNP1	1.93	4.68	1.28	5e-05	0.00174
ENSG00000243352	RN7SL8P	7.58	18.45	1.28	5e-05	0.00174
ENSG00000201558	RNVU1-6	70.04	171.76	1.29	5e-05	0.00174
ENSG00000225969	ABHD11-AS1	0.44	1.09	1.3	0.00075	0.0145
ENSG00000124102	PI3	12.05	29.83	1.31	5e-05	0.00174
ENSG00000131737	KRT34	1.03	2.54	1.31	5e-05	0.00174
ENSG00000086730	LAT2	0.48	1.19	1.31	5e-05	0.00174
ENSG00000087494	PTHLH	1.44	3.59	1.32	5e-05	0.00174
ENSG00000167767	KRT80	0.82	2.05	1.33	5e-05	0.00174
ENSG00000107485	GATA3	0.46	1.15	1.33	0.0019	0.0281
ENSG00000156510	HKDC1	1.11	2.79	1.33	5e-05	0.00174
ENSG00000189334	S100A14	4.48	11.25	1.33	5e-05	0.00174
ENSG00000164400	CSF2	0.86	2.18	1.33	5e-05	0.00174
ENSG00000186594	MIR22HG	1.81	4.56	1.33	5e-05	0.00174
ENSG00000166278	C2	0.73	1.85	1.34	5e-05	0.00174
ENSG00000243649	CFB	0.73	1.85	1.34	5e-05	0.00174
ENSG00000244255	XXbac-BPG116M5.17	0.73	1.85	1.34	5e-05	0.00174
ENSG00000258689	LINC01269	0.55	1.39	1.35	0.0004	0.00913
ENSG00000212456	U1	44.07	112.73	1.35	5e-05	0.00174
ENSG00000228541	AC093159.1	1.29	3.33	1.36	5e-05	0.00174
ENSG00000124116	WFDC3	3.01	7.8	1.37	5e-05	0.00174
ENSG00000100867	DHRS2	1.77	4.59	1.37	5e-05	0.00174
ENSG00000153714	LURAP1L	12.58	32.59	1.37	5e-05	0.00174
ENSG00000188910	GJB3	6.38	16.61	1.38	0.00085	0.0159
ENSG00000154133	ROBO4	0.68	1.8	1.41	5e-05	0.00174
ENSG00000172602	RND1	0.41	1.1	1.42	5e-05	0.00174
ENSG00000239775	AC017116.11	0.45	1.21	1.43	5e-05	0.00174
ENSG00000136279	DBNL	0.45	1.21	1.43	5e-05	0.00174
ENSG00000225485	ARHGAP23	0.66	1.81	1.45	0.0036	0.0442
ENSG00000115008	IL1A	0.4	1.09	1.45	5e-05	0.00174
ENSG00000118503	TNFAIP3	1.33	3.71	1.48	0.0001	0.00308
ENSG00000107738	C10orf54	0.82	2.27	1.48	5e-05	0.00174
ENSG00000166828	SCNN1G	2.93	8.39	1.52	5e-05	0.00174
ENSG00000169583	CLIC3	0.83	2.46	1.56	5e-05	0.00174
ENSG00000197180	CH17-340M24.3	1.18	3.51	1.57	0.00355	0.0438
ENSG00000146592	CREB5	1.02	3.04	1.57	5e-05	0.00174
ENSG00000167103	PIP5KL1	0.45	1.39	1.62	5e-05	0.00174
ENSG00000234498	RPL13AP20	4.03	12.49	1.63	5e-05	0.00174
ENSG00000185479	KRT6B	0.42	1.3	1.64	5e-05	0.00174
ENSG00000073734	ABCB11	0.39	1.2	1.64	5e-05	0.00174
ENSG00000172927	MYEOV	0.86	2.74	1.67	0.0004	0.00913
ENSG00000105696	TMEM59L	0.35	1.11	1.67	5e-05	0.00174
ENSG00000239705	RP11-65N13.8	0.56	1.8	1.69	5e-05	0.00174
ENSG00000188100	FAM25A	0.79	2.65	1.74	0.00015	0.0043
ENSG00000241544	RP11-6F2.5	0.83	2.78	1.74	5e-05	0.00174
ENSG00000010295	IFFO1	0.35	1.18	1.75	5e-05	0.00174
ENSG00000104413	ESRP1	0.46	1.57	1.78	5e-05	0.00174
ENSG00000168468	ATF6B	0.39	1.4	1.85	5e-05	0.00174
ENSG00000231608	TNXB	0.39	1.4	1.85	5e-05	0.00174
ENSG00000133328	HRASLS2	0.34	1.24	1.86	5e-05	0.00174
ENSG00000162772	ATF3	11.44	42.85	1.91	5e-05	0.00174
ENSG00000243582	AC087650.5	9.77	36.79	1.91	5e-05	0.00174
ENSG00000162892	IL24	0.35	1.31	1.92	5e-05	0.00174
ENSG00000163734	CXCL3	2.18	8.28	1.92	5e-05	0.00174
ENSG00000238005	RP11-443B7.1	0.57	2.32	2.02	5e-05	0.00174
ENSG00000113140	SPARC	1.72	7.01	2.03	5e-05	0.00174
ENSG00000205111	CDKL4	1.05	4.63	2.15	5e-05	0.00174
ENSG00000104081	BMF	0.22	1.03	2.23	5e-05	0.00174
ENSG00000171360	KRT38	0.31	1.54	2.33	5e-05	0.00174
ENSG00000108417	KRT37	2.42	12.49	2.37	5e-05	0.00174
ENSG00000139269	INHBE	0.59	3.22	2.46	5e-05	0.00174
ENSG00000134548	SPX	0.33	1.85	2.48	5e-05	0.00174
ENSG00000149781	FERMT3	0.23	1.32	2.5	0.00355	0.0438
ENSG00000248400	ST13P12	0.18	1.04	2.51	5e-05	0.00174
ENSG00000214145	LINC00887	0.39	2.27	2.53	5e-05	0.00174
ENSG00000105550	FGF21	1.27	7.76	2.61	5e-05	0.00174
ENSG00000231016	RP11-502H18.1	0.21	1.3	2.63	0.00245	0.0332
ENSG00000136244	IL6	0.63	3.96	2.65	5e-05	0.00174
ENSG00000140465	CYP1A1	0.5	4.45	3.15	5e-05	0.00174
ENSG00000257540	-	7.37	68.4	3.21	5e-05	0.00174
ENSG00000205426	KRT81	7.37	68.4	3.21	5e-05	0.00174
ENSG00000170523	KRT83	7.37	68.4	3.21	5e-05	0.00174
ENSG00000198576	ARC	0.78	8.06	3.37	5e-05	0.00174
ENSG00000184586	AP000244.1	0.38	5.5	3.84	5e-05	0.00174
ENSG00000227468	AL928742.12	0.06	1.2	4.3	5e-05	0.00174
ENSG00000211891	IGHE	0.06	1.2	4.3	5e-05	0.00174
ENSG00000254140	RP11-731F5.1	0.06	1.2	4.3	5e-05	0.00174
