# Supplementary material for: MBNL1 alternative splicing isoforms play opposing roles in cancer
Source: Life Sci Alliance. 2018 Sep 7;1(5):e201800157. doi: 10.26508/lsa.201800157 (PMC6238595; doi:10.26508/lsa.201800157)
Supplement: Supplementary file 7 [file LSA-2018-00157_TableS6.xlsx]

## Sheet: Table S6 DiffSpliced GO
Input ID	Gene ID	Type	Tax ID	Homologene Gene ID	Homologene Gene Tax ID	Gene Symbol	Description	Biological Process (GO)	Kinase Class (UniProt)	Protein Function (Protein Atlas)	Subcellular Location (Protein Atlas)	Drug (DrugBank)	Canonical Pathways Canonical Pathways Canonical Pathways Canonical Pathways Canonical Pathways Canonical Pathways Canonical Pathways Canonical Pathways Canonical Pathways Canonical Pathways Canonical Pathways Canonical Pathways Canonical Pathw	Hallmark Gene Sets Hallmark Gene Sets Hallmark Gene Sets Hallmark Gene Sets Hallmark Gene Sets Hallmark Gene Sets Hallmark Gene Sets Hallmark Gene Sets Hallmark Gene Sets Hallmark Gene Sets Hallmark Gene Sets Hallmark Gene Sets Hallmark Gene S	GO:0007015 actin filament organization	GO:0006281 DNA repair	GO:0016569 covalent chromatin modificatio	GO:0048667 cell morphogenesis involved in	GO:0009314 response to radiation	GO:0051301 cell division	GO:0051656 establishment of organelle loc	GO:0051129 negative regulation of cellula	GO:0051271 negative regulation of cellula	M00078 Heparan sulfate degradation	GO:0045786 negative regulation of cell cy	GO:0043623 cellular protein complex assem	GO:0033044 regulation of chromosome organ	GO:0043087 regulation of GTPase activity	GO:0016558 protein import into peroxisome	GO:0048268 clathrin coat assembly	CORUM:6671 PI4K2A-WASH complex	GO:0070528 protein kinase C signaling	GO:2000177 regulation of neural precursor	GO:0021543 pallium development
ENSG00000240498	100048912	ensembl_gene_id	H. sapiens	100048912	H. sapiens	CDKN2B-AS1	CDKN2B antisense RNA 1								0.0	0.0	0.0	0.0	0.0	0.0	0.0	0.0	0.0	0.0	0.0	0.0	0.0	0.0	0.0	0.0	0.0	0.0	0.0	0.0
ENSG00000136754	10006	ensembl_gene_id	H. sapiens	10006	H. sapiens	ABI1	abl interactor 1	GO:0038096 Fc-gamma receptor signaling pathway involved in phagocytosis;GO:0035855 megakaryocyte development;GO:0061098 positive regulation of protein tyrosine kinase activity			Cell Junctions;Plasma membrane(Supported)		(M277)PID INTEGRIN A4B1 PATHWAY; (M241)PID RAC1 REG PATHWAY; (M156)PID ECADHERIN NASCENT AJ PATHWAY	(M5950)HALLMARK ALLOGRAFT REJECTION; (M5932)HALLMARK INFLAMMATORY RESPONSE; (M5893)HALLMARK MITOTIC SPINDLE	1.0	0.0	0.0	1.0	0.0	0.0	0.0	0.0	0.0	0.0	0.0	0.0	0.0	0.0	0.0	0.0	0.0	0.0	0.0	0.0
ENSG00000269343	100293516	ensembl_gene_id	H. sapiens	100293516	H. sapiens	ZNF587B	zinc finger protein 587B	GO:0045892 negative regulation of transcription, DNA-templated;GO:1903507 negative regulation of nucleic acid-templated transcription;GO:1902679 negative regulation of RNA biosynthetic process			Nucleus(Uncertain)				0.0	0.0	0.0	0.0	0.0	0.0	0.0	0.0	0.0	0.0	0.0	0.0	0.0	0.0	0.0	0.0	0.0	0.0	0.0	0.0
ENSG00000234171	100506054	ensembl_gene_id	H. sapiens	100506054	H. sapiens	RNASEH1-AS1	RNASEH1 antisense RNA 1								0.0	0.0	0.0	0.0	0.0	0.0	0.0	0.0	0.0	0.0	0.0	0.0	0.0	0.0	0.0	0.0	0.0	0.0	0.0	0.0
ENSG00000113810	10051	ensembl_gene_id	H. sapiens	10051	H. sapiens	SMC4	structural maintenance of chromosomes 4	GO:0010032 meiotic chromosome condensation;GO:0007076 mitotic chromosome condensation;GO:0051383 kinetochore organization			Cytosol;Nuclear speckles(Supported)		(M14)PID AURORA B PATHWAY	(M5925)HALLMARK E2F TARGETS; (M5901)HALLMARK G2M CHECKPOINT; (M5893)HALLMARK MITOTIC SPINDLE	0.0	0.0	0.0	0.0	0.0	1.0	0.0	0.0	0.0	0.0	0.0	0.0	0.0	0.0	0.0	0.0	0.0	0.0	0.0	0.0
ENSG00000113522	10111	ensembl_gene_id	H. sapiens	10111	H. sapiens	RAD50	RAD50 double strand break repair protein	GO:1904354 negative regulation of telomere capping;GO:0031860 telomeric 3' overhang formation;GO:0000019 regulation of mitotic recombination			Nucleoplasm(Validated)		(M258)PID BARD1 PATHWAY; (M84)PID ATM PATHWAY; (M1)PID FANCONI PATHWAY	(M5925)HALLMARK E2F TARGETS	1.0	1.0	0.0	0.0	0.0	1.0	0.0	1.0	0.0	0.0	0.0	0.0	1.0	0.0	0.0	0.0	0.0	0.0	0.0	0.0
ENSG00000122644	10124	ensembl_gene_id	H. sapiens	10124	H. sapiens	ARL4A	ADP ribosylation factor like GTPase 4A	GO:0050873 brown fat cell differentiation;GO:0045444 fat cell differentiation;GO:0007264 small GTPase mediated signal transduction			Cytosol;Nucleoplasm(Supported)			(M5951)HALLMARK SPERMATOGENESIS; (M5913)HALLMARK INTERFERON GAMMA RESPONSE; (M5947)HALLMARK IL2 STAT5 SIGNALING	0.0	0.0	0.0	0.0	0.0	0.0	0.0	0.0	0.0	0.0	0.0	0.0	0.0	0.0	0.0	0.0	0.0	0.0	0.0	0.0
ENSG00000138640	10144	ensembl_gene_id	H. sapiens	10144	H. sapiens	FAM13A	family with sequence similarity 13 member A	GO:0043547 positive regulation of GTPase activity;GO:0051056 regulation of small GTPase mediated signal transduction;GO:0043087 regulation of GTPase activity			Cell Junctions;Cytosol;Nucleoli(Approved)				0.0	0.0	0.0	0.0	0.0	0.0	0.0	0.0	0.0	0.0	0.0	0.0	0.0	1.0	0.0	0.0	0.0	0.0	0.0	0.0
ENSG00000064607	10147	ensembl_gene_id	H. sapiens	10147	H. sapiens	SUGP2	SURP and G-patch domain containing 2	GO:0008380 RNA splicing;GO:0006397 mRNA processing;GO:0016071 mRNA metabolic process			Nucleoplasm(Validated)Nuclear bodies(Approved)				0.0	0.0	0.0	0.0	0.0	0.0	0.0	0.0	0.0	0.0	0.0	0.0	0.0	0.0	0.0	0.0	0.0	0.0	0.0	0.0
ENSG00000261008	101927957	ensembl_gene_id	H. sapiens	101927957	H. sapiens	LINC01572	long intergenic non-protein coding RNA 1572								0.0	0.0	0.0	0.0	0.0	0.0	0.0	0.0	0.0	0.0	0.0	0.0	0.0	0.0	0.0	0.0	0.0	0.0	0.0	0.0
ENSG00000172113	10201	ensembl_gene_id	H. sapiens	10201	H. sapiens	NME6	NME/NM23 nucleoside diphosphate kinase 6	GO:0006183 GTP biosynthetic process;GO:0006228 UTP biosynthetic process;GO:0006241 CTP biosynthetic process		Enzymes/ENZYME proteins/Transferases	Vesicles(Approved)				0.0	0.0	0.0	0.0	0.0	1.0	0.0	1.0	0.0	0.0	1.0	0.0	0.0	0.0	0.0	0.0	0.0	0.0	0.0	0.0
ENSG00000070404	10272	ensembl_gene_id	H. sapiens	10272	H. sapiens	FSTL3	follistatin like 3	GO:0045671 negative regulation of osteoclast differentiation;GO:0032926 negative regulation of activin receptor signaling pathway;GO:0002762 negative regulation of myeloid leukocyte differentiation			Nucleoplasm(Approved)		(M5883)NABA SECRETED FACTORS; (M5885)NABA MATRISOME ASSOCIATED; (M5889)NABA MATRISOME	(M5930)HALLMARK EPITHELIAL MESENCHYMAL TRANSITION	0.0	0.0	0.0	0.0	0.0	0.0	0.0	0.0	0.0	0.0	0.0	0.0	0.0	0.0	0.0	0.0	0.0	0.0	0.0	0.0
ENSG00000145901	10318	ensembl_gene_id	H. sapiens	10318	H. sapiens	TNIP1	TNFAIP3 interacting protein 1	GO:0085032 modulation by symbiont of host I-kappaB kinase/NF-kappaB cascade;GO:0052027 modulation by symbiont of host signal transduction pathway;GO:0052250 modulation of signal transduction in other organism involved in symbiotic interaction			Cytosol;Nucleoplasm(Supported)			(M5890)HALLMARK TNFA SIGNALING VIA NFKB	0.0	0.0	0.0	0.0	0.0	0.0	0.0	0.0	0.0	0.0	0.0	0.0	0.0	0.0	0.0	0.0	0.0	0.0	0.0	0.0
ENSG00000154263	10349	ensembl_gene_id	H. sapiens	10349	H. sapiens	ABCA10	ATP binding cassette subfamily A member 10	GO:0006869 lipid transport;GO:0010876 lipid localization;GO:0055085 transmembrane transport		Transporters/Primary Active Transporters					0.0	0.0	0.0	0.0	0.0	0.0	0.0	0.0	0.0	0.0	0.0	0.0	0.0	0.0	0.0	0.0	0.0	0.0	0.0	0.0
ENSG00000197381	104	ensembl_gene_id	H. sapiens	104	H. sapiens	ADARB1	adenosine deaminase, RNA specific B1	GO:0021965 spinal cord ventral commissure morphogenesis;GO:0021618 hypoglossal nerve morphogenesis;GO:0021566 hypoglossal nerve development		Enzymes/ENZYME proteins/Hydrolases	Nucleoplasm(Supported)Cytosol(Approved)				0.0	0.0	0.0	1.0	0.0	0.0	0.0	0.0	1.0	0.0	0.0	0.0	0.0	0.0	0.0	0.0	0.0	0.0	0.0	0.0
ENSG00000064225	10402	ensembl_gene_id	H. sapiens	10402	H. sapiens	ST3GAL6	ST3 beta-galactoside alpha-2,3-sialyltransferase 6	GO:0018146 keratan sulfate biosynthetic process;GO:0042339 keratan sulfate metabolic process;GO:0018279 protein N-linked glycosylation via asparagine						(M5903)HALLMARK NOTCH SIGNALING	0.0	0.0	0.0	0.0	0.0	0.0	0.0	0.0	0.0	0.0	0.0	0.0	0.0	0.0	0.0	0.0	0.0	0.0	0.0	0.0
ENSG00000177479	10425	ensembl_gene_id	H. sapiens	10425	H. sapiens	ARIH2	ariadne RBR E3 ubiquitin protein ligase 2	GO:0032436 positive regulation of proteasomal ubiquitin-dependent protein catabolic process;GO:1903955 positive regulation of protein targeting to mitochondrion;GO:1901800 positive regulation of proteasomal protein catabolic process			Nucleoplasm(Validated)				1.0	0.0	0.0	1.0	0.0	0.0	0.0	0.0	0.0	0.0	0.0	0.0	0.0	0.0	0.0	0.0	0.0	0.0	0.0	0.0
ENSG00000115694	10494	ensembl_gene_id	H. sapiens	10494	H. sapiens	STK25	serine/threonine kinase 25	GO:0036481 intrinsic apoptotic signaling pathway in response to hydrogen peroxide;GO:0090168 Golgi reassembly;GO:0010421 hydrogen peroxide-mediated programmed cell death	STE Ser/Thr protein kinase family	Enzymes/{ENZYME proteins/Transferases,Kinases/STE Ser/Thr protein kinases}				(M5938)HALLMARK REACTIVE OXIGEN SPECIES PATHWAY; (M5941)HALLMARK UV RESPONSE UP	0.0	0.0	0.0	1.0	0.0	0.0	1.0	0.0	0.0	0.0	0.0	0.0	0.0	0.0	0.0	0.0	0.0	0.0	0.0	0.0
ENSG00000108010	10539	ensembl_gene_id	H. sapiens	10539	H. sapiens	GLRX3	glutaredoxin 3	GO:0010614 negative regulation of cardiac muscle hypertrophy;GO:0044571 [2Fe-2S] cluster assembly;GO:0014741 negative regulation of muscle hypertrophy							0.0	0.0	0.0	0.0	0.0	0.0	0.0	0.0	0.0	0.0	0.0	0.0	0.0	0.0	0.0	0.0	0.0	0.0	0.0	0.0
ENSG00000138778	1062	ensembl_gene_id	H. sapiens	1062	H. sapiens	CENPE	centromere protein E	GO:0099607 lateral attachment of mitotic spindle microtubules to kinetochore;GO:0007079 mitotic chromosome movement towards spindle pole;GO:0051315 attachment of mitotic spindle microtubules to kinetochore			Cytosol;Microtubules(Supported)	GSK-923295 (Microtubule motor activity)	(M129)PID PLK1 PATHWAY	(M5925)HALLMARK E2F TARGETS; (M5901)HALLMARK G2M CHECKPOINT; (M5893)HALLMARK MITOTIC SPINDLE	0.0	0.0	0.0	0.0	0.0	1.0	1.0	0.0	0.0	0.0	1.0	1.0	1.0	0.0	0.0	0.0	0.0	0.0	0.0	0.0
ENSG00000221926	10626	ensembl_gene_id	H. sapiens	10626	H. sapiens	TRIM16	tripartite motif containing 16	GO:0050718 positive regulation of interleukin-1 beta secretion;GO:0050716 positive regulation of interleukin-1 secretion;GO:0050706 regulation of interleukin-1 beta secretion			Cytosol(Supported)Plasma membrane(Approved)				0.0	0.0	1.0	0.0	0.0	0.0	0.0	0.0	0.0	0.0	0.0	0.0	0.0	0.0	0.0	0.0	0.0	0.0	0.0	0.0
ENSG00000185340	10634	ensembl_gene_id	H. sapiens	10634	H. sapiens	GAS2L1	growth arrest specific 2 like 1	GO:0097067 cellular response to thyroid hormone stimulus;GO:0097066 response to thyroid hormone;GO:0009267 cellular response to starvation			Cell Junctions;Plasma membrane(Approved)				0.0	0.0	0.0	0.0	0.0	0.0	0.0	0.0	0.0	0.0	1.0	0.0	0.0	0.0	0.0	0.0	0.0	0.0	0.0	0.0
ENSG00000156261	10694	ensembl_gene_id	H. sapiens	10694	H. sapiens	CCT8	chaperonin containing TCP1 subunit 8	GO:1904871 positive regulation of protein localization to Cajal body;GO:1904869 regulation of protein localization to Cajal body;GO:1904851 positive regulation of establishment of protein localization to telomere			Intermediate filaments(Supported)Cytosol;Nucleus(Approved)				1.0	0.0	0.0	0.0	0.0	0.0	0.0	0.0	0.0	0.0	0.0	0.0	1.0	0.0	0.0	0.0	0.0	0.0	0.0	0.0
ENSG00000129250	10749	ensembl_gene_id	H. sapiens	10749	H. sapiens	KIF1C	kinesin family member 1C	GO:0006890 retrograde vesicle-mediated transport, Golgi to ER;GO:0030705 cytoskeleton-dependent intracellular transport;GO:0007018 microtubule-based movement							0.0	0.0	0.0	0.0	0.0	0.0	0.0	0.0	0.0	0.0	0.0	0.0	0.0	0.0	0.0	0.0	0.0	0.0	0.0	0.0
ENSG00000105171	10775	ensembl_gene_id	H. sapiens	10775	H. sapiens	POP4	POP4 homolog, ribonuclease P/MRP subunit	GO:0001682 tRNA 5'-leader removal;GO:0006379 mRNA cleavage;GO:0090502 RNA phosphodiester bond hydrolysis, endonucleolytic		Enzymes/ENZYME proteins/Hydrolases				(M5922)HALLMARK UNFOLDED PROTEIN RESPONSE	0.0	0.0	0.0	0.0	0.0	0.0	0.0	0.0	0.0	0.0	0.0	0.0	0.0	0.0	0.0	0.0	0.0	0.0	0.0	0.0
ENSG00000132824	10955	ensembl_gene_id	H. sapiens	10955	H. sapiens	SERINC3	serine incorporator 3	GO:0015825 L-serine transport;GO:1902237 positive regulation of endoplasmic reticulum stress-induced intrinsic apoptotic signaling pathway;GO:0006564 L-serine biosynthetic process							0.0	0.0	0.0	0.0	0.0	0.0	0.0	0.0	0.0	0.0	0.0	0.0	0.0	0.0	0.0	0.0	0.0	0.0	0.0	0.0
ENSG00000089154	10985	ensembl_gene_id	H. sapiens	10985	H. sapiens	GCN1	GCN1, eIF2 alpha kinase activator homolog	GO:1990253 cellular response to leucine starvation;GO:0036003 positive regulation of transcription from RNA polymerase II promoter in response to stress;GO:0034198 cellular response to amino acid starvation			Cytosol(Validated)				0.0	0.0	0.0	0.0	0.0	0.0	0.0	0.0	0.0	0.0	0.0	0.0	0.0	0.0	0.0	0.0	0.0	0.0	0.0	0.0
ENSG00000146872	11011	ensembl_gene_id	H. sapiens	11011	H. sapiens	TLK2	tousled like kinase 2	GO:0032435 negative regulation of proteasomal ubiquitin-dependent protein catabolic process;GO:1901799 negative regulation of proteasomal protein catabolic process;GO:1903051 negative regulation of proteolysis involved in cellular protein catabolic proces	Other	Enzymes/{ENZYME proteins/Transferases,Kinases}					0.0	1.0	1.0	0.0	1.0	1.0	0.0	0.0	0.0	0.0	0.0	0.0	1.0	0.0	0.0	0.0	0.0	0.0	0.0	0.0
ENSG00000130958	11046	ensembl_gene_id	H. sapiens	11046	H. sapiens	SLC35D2	solute carrier family 35 member D2	GO:0018146 keratan sulfate biosynthetic process;GO:0042339 keratan sulfate metabolic process;GO:0006024 glycosaminoglycan biosynthetic process		Transporters/Electrochemical Potential-driven transporters	Golgi apparatus(Validated)				0.0	0.0	0.0	0.0	0.0	0.0	0.0	0.0	0.0	0.0	0.0	0.0	0.0	0.0	0.0	0.0	0.0	0.0	0.0	0.0
ENSG00000153922	1105	ensembl_gene_id	H. sapiens	1105	H. sapiens	CHD1	chromodomain helicase DNA binding protein 1	GO:0043923 positive regulation by host of viral transcription;GO:0043921 modulation by host of viral transcription;GO:0050434 positive regulation of viral transcription		Enzymes/ENZYME proteins/Hydrolases	Nucleoli fibrillar center;Nucleus(Supported)	Epirubicin (Methylated histone binding)			0.0	1.0	1.0	0.0	0.0	0.0	0.0	0.0	0.0	0.0	0.0	0.0	0.0	0.0	0.0	0.0	0.0	0.0	0.0	0.0
ENSG00000174233	112	ensembl_gene_id	H. sapiens	112	H. sapiens	ADCY6	adenylate cyclase 6	GO:0007190 activation of adenylate cyclase activity;GO:0045762 positive regulation of adenylate cyclase activity;GO:1904117 cellular response to vasopressin		Enzymes/ENZYME proteins/Lyases	Golgi apparatus(Approved)		(M56)PID LPA4 PATHWAY; (M8)PID ENDOTHELIN PATHWAY; (M15)PID LYSOPHOSPHOLIPID PATHWAY	(M5898)HALLMARK DNA REPAIR; (M5905)HALLMARK ADIPOGENESIS	1.0	0.0	0.0	1.0	0.0	0.0	0.0	1.0	0.0	0.0	0.0	0.0	0.0	0.0	0.0	0.0	0.0	0.0	0.0	0.0
ENSG00000023516	11215	ensembl_gene_id	H. sapiens	11215	H. sapiens	AKAP11	A-kinase anchoring protein 11	GO:0010738 regulation of protein kinase A signaling;GO:0010737 protein kinase A signaling;GO:1902531 regulation of intracellular signal transduction			Cytosol;Nucleoli;Plasma membrane(Approved)				0.0	0.0	0.0	0.0	0.0	0.0	0.0	0.0	0.0	0.0	0.0	0.0	0.0	0.0	0.0	0.0	0.0	0.0	0.0	0.0
ENSG00000256525	11232	ensembl_gene_id	H. sapiens	11232	H. sapiens	POLG2	DNA polymerase gamma 2, accessory subunit	GO:0006426 glycyl-tRNA aminoacylation;GO:0006418 tRNA aminoacylation for protein translation;GO:0032042 mitochondrial DNA metabolic process		Enzymes/ENZYME proteins/Transferases	Mitochondria(Supported)Nuclear bodies(Uncertain)			(M5941)HALLMARK UV RESPONSE UP	0.0	1.0	0.0	1.0	0.0	0.0	0.0	0.0	0.0	0.0	0.0	0.0	1.0	0.0	0.0	0.0	0.0	0.0	0.0	0.0
ENSG00000159210	11267	ensembl_gene_id	H. sapiens	11267	H. sapiens	SNF8	SNF8, ESCRT-II complex subunit	GO:1903772 regulation of viral budding via host ESCRT complex;GO:0010797 regulation of multivesicular body size involved in endosome transport;GO:0039702 viral budding via host ESCRT complex			Cytosol;Nucleoplasm(Supported)				1.0	0.0	0.0	0.0	0.0	0.0	0.0	0.0	0.0	0.0	0.0	0.0	0.0	0.0	0.0	0.0	0.0	0.0	0.0	0.0
ENSG00000039650	11284	ensembl_gene_id	H. sapiens	11284	H. sapiens	PNKP	polynucleotide kinase 3'-phosphatase	GO:0098504 DNA 3' dephosphorylation involved in DNA repair;GO:0000718 nucleotide-excision repair, DNA damage removal;GO:0098503 DNA 3' dephosphorylation		Enzymes/ENZYME proteins/{Hydrolases,Transferases}	Nucleoli;Nucleus(Supported)		(M42)PID DNA PK PATHWAY		1.0	1.0	0.0	0.0	1.0	0.0	0.0	0.0	0.0	0.0	0.0	0.0	1.0	0.0	0.0	0.0	0.0	0.0	0.0	0.0
ENSG00000176476	112869	ensembl_gene_id	H. sapiens	112869	H. sapiens	SGF29	SAGA complex associated factor 29	GO:0071169 establishment of protein localization to chromatin;GO:0043966 histone H3 acetylation;GO:0070199 establishment of protein localization to chromosome			Nucleoli;Nucleus(Approved)				0.0	0.0	1.0	0.0	0.0	0.0	0.0	0.0	0.0	0.0	0.0	0.0	0.0	0.0	0.0	0.0	0.0	0.0	0.0	0.0
ENSG00000007376	113000	ensembl_gene_id	H. sapiens	113000	H. sapiens	RPUSD1	RNA pseudouridylate synthase domain containing 1	GO:0001522 pseudouridine synthesis;GO:0009451 RNA modification;GO:0043412 macromolecule modification			Cell Junctions;Cytosol;Golgi apparatus;Nucleus(Approved)				0.0	0.0	0.0	0.0	0.0	0.0	0.0	0.0	0.0	0.0	0.0	0.0	0.0	0.0	0.0	0.0	0.0	0.0	0.0	0.0
ENSG00000082996	11342	ensembl_gene_id	H. sapiens	11342	H. sapiens	RNF13	ring finger protein 13	GO:0051865 protein autoubiquitination;GO:0016567 protein ubiquitination;GO:0032446 protein modification by small protein conjugation			Cytosol;Nucleoplasm;Vesicles(Approved)				0.0	0.0	0.0	0.0	0.0	0.0	0.0	0.0	0.0	0.0	0.0	0.0	0.0	0.0	0.0	0.0	0.0	0.0	0.0	0.0
ENSG00000142920	113451	ensembl_gene_id	H. sapiens	113451	H. sapiens	AZIN2	antizyme inhibitor 2	GO:0033387 putrescine biosynthetic process from ornithine;GO:0097055 agmatine biosynthetic process;GO:1902269 positive regulation of polyamine transmembrane transport			Cytosol(Approved)	Pyridoxal Phosphate (Putrescine transmembrane transporter activity);L-Arginine (Putrescine transmembrane transporter activity)			0.0	0.0	0.0	0.0	0.0	0.0	0.0	0.0	0.0	0.0	0.0	0.0	0.0	0.0	0.0	0.0	0.0	0.0	0.0	0.0
ENSG00000162601	114803	ensembl_gene_id	H. sapiens	114803	H. sapiens	MYSM1	Myb like, SWIRM and MPN domains 1	GO:0035522 monoubiquitinated histone H2A deubiquitination;GO:0035521 monoubiquitinated histone deubiquitination;GO:0051797 regulation of hair follicle development		Enzymes/Peptidases/Metallopeptidases	Nucleoplasm(Supported)Plasma membrane(Approved)				0.0	0.0	1.0	0.0	0.0	0.0	0.0	0.0	1.0	0.0	0.0	0.0	0.0	0.0	0.0	0.0	0.0	0.0	0.0	0.0
ENSG00000141447	114876	ensembl_gene_id	H. sapiens	114876	H. sapiens	OSBPL1A	oxysterol binding protein like 1A	GO:0006699 bile acid biosynthetic process;GO:0019886 antigen processing and presentation of exogenous peptide antigen via MHC class II;GO:0008206 bile acid metabolic process			Cytosol(Approved)Nucleoplasm(Uncertain)				0.0	0.0	0.0	0.0	0.0	0.0	0.0	0.0	0.0	0.0	0.0	0.0	0.0	0.0	0.0	0.0	0.0	0.0	0.0	0.0
ENSG00000157657	114991	ensembl_gene_id	H. sapiens	114991	H. sapiens	ZNF618	zinc finger protein 618	GO:0006355 regulation of transcription, DNA-templated;GO:1903506 regulation of nucleic acid-templated transcription;GO:0006351 transcription, DNA-templated		Transcription factors/Zinc-coordinating DNA-binding domains	Nucleoplasm(Approved)				0.0	0.0	0.0	0.0	0.0	0.0	0.0	0.0	0.0	0.0	0.0	0.0	0.0	0.0	0.0	0.0	0.0	0.0	0.0	0.0
ENSG00000157107	115548	ensembl_gene_id	H. sapiens	115548	H. sapiens	FCHO2	FCH domain only 2	GO:0048488 synaptic vesicle endocytosis;GO:0036465 synaptic vesicle recycling;GO:0048268 clathrin coat assembly			Centrosome;Cytosol;Vesicles(Approved)				0.0	0.0	0.0	0.0	0.0	0.0	1.0	0.0	0.0	0.0	0.0	1.0	0.0	0.0	0.0	1.0	0.0	0.0	0.0	0.0
ENSG00000188037	1180	ensembl_gene_id	H. sapiens	1180	H. sapiens	CLCN1	chloride voltage-gated channel 1	GO:0019227 neuronal action potential propagation;GO:0098870 action potential propagation;GO:1903959 regulation of anion transmembrane transport		Transporters/Electrochemical Potential-driven transporters					0.0	0.0	0.0	0.0	0.0	0.0	0.0	0.0	0.0	0.0	0.0	0.0	0.0	0.0	0.0	0.0	0.0	0.0	0.0	0.0
ENSG00000176444	1196	ensembl_gene_id	H. sapiens	1196	H. sapiens	CLK2	CDC like kinase 2	GO:0045721 negative regulation of gluconeogenesis;GO:0006111 regulation of gluconeogenesis;GO:0006094 gluconeogenesis	CMGC Ser/Thr protein kinase family	Enzymes/{ENZYME proteins/Transferases,Kinases/CMGC Ser/Thr protein kinases}	Nucleoplasm(Validated)Nuclear bodies(Supported)				0.0	0.0	0.0	0.0	1.0	0.0	0.0	0.0	0.0	0.0	0.0	0.0	0.0	0.0	0.0	0.0	0.0	0.0	0.0	0.0
ENSG00000139350	121441	ensembl_gene_id	H. sapiens	121441	H. sapiens	NEDD1	neural precursor cell expressed, developmentally down-regulated 1	GO:0071539 protein localization to centrosome;GO:1905508 protein localization to microtubule organizing center;GO:0072698 protein localization to microtubule cytoskeleton							0.0	0.0	0.0	0.0	0.0	1.0	0.0	0.0	0.0	0.0	1.0	0.0	0.0	0.0	0.0	0.0	0.0	0.0	0.0	0.0
ENSG00000172590	122704	ensembl_gene_id	H. sapiens	122704	H. sapiens	MRPL52	mitochondrial ribosomal protein L52	GO:0070126 mitochondrial translational termination;GO:0070125 mitochondrial translational elongation;GO:0006415 translational termination			Mitochondria(Approved)				0.0	0.0	0.0	0.0	0.0	0.0	0.0	0.0	0.0	0.0	0.0	0.0	0.0	0.0	0.0	0.0	0.0	0.0	0.0	0.0
ENSG00000168096	124401	ensembl_gene_id	H. sapiens	124401	H. sapiens	ANKS3	ankyrin repeat and sterile alpha motif domain containing 3				Cytosol;Nucleoplasm(Supported)				0.0	0.0	0.0	0.0	0.0	0.0	0.0	0.0	0.0	0.0	0.0	0.0	0.0	0.0	0.0	0.0	0.0	0.0	0.0	0.0
ENSG00000149932	124446	ensembl_gene_id	H. sapiens	124446	H. sapiens	TMEM219	transmembrane protein 219	GO:0042981 regulation of apoptotic process;GO:0043067 regulation of programmed cell death;GO:0006915 apoptotic process							0.0	0.0	0.0	0.0	0.0	0.0	0.0	0.0	0.0	0.0	0.0	0.0	0.0	0.0	0.0	0.0	0.0	0.0	0.0	0.0
ENSG00000171302	124583	ensembl_gene_id	H. sapiens	124583	H. sapiens	CANT1	calcium activated nucleotidase 1	GO:0043312 neutrophil degranulation;GO:0002283 neutrophil activation involved in immune response;GO:0030166 proteoglycan biosynthetic process		Enzymes/ENZYME proteins/Hydrolases		Phosphomethylphosphonic Acid Guanosyl Ester (Uridine-diphosphatase activity);Tris (Uridine-diphosphatase activity)		(M5898)HALLMARK DNA REPAIR; (M5906)HALLMARK ESTROGEN RESPONSE EARLY	0.0	0.0	0.0	0.0	0.0	0.0	0.0	0.0	0.0	0.0	0.0	0.0	0.0	0.0	0.0	0.0	0.0	0.0	0.0	0.0
ENSG00000178852	124989	ensembl_gene_id	H. sapiens	124989	H. sapiens	EFCAB13	EF-hand calcium binding domain 13								0.0	0.0	0.0	0.0	0.0	0.0	0.0	0.0	0.0	0.0	0.0	0.0	0.0	0.0	0.0	0.0	0.0	0.0	0.0	0.0
ENSG00000183077	125061	ensembl_gene_id	H. sapiens	125061	H. sapiens	AFMID	arylformamidase	GO:0019441 tryptophan catabolic process to kynurenine;GO:0006569 tryptophan catabolic process;GO:0046218 indolalkylamine catabolic process		Enzymes/ENZYME proteins/Hydrolases	Mitochondria(Approved)				0.0	0.0	0.0	0.0	0.0	0.0	0.0	0.0	0.0	0.0	0.0	0.0	0.0	0.0	0.0	0.0	0.0	0.0	0.0	0.0
ENSG00000161091	126321	ensembl_gene_id	H. sapiens	126321	H. sapiens	MFSD12	major facilitator superfamily domain containing 12	GO:0006810 transport;GO:0051234 establishment of localization;GO:0051179 localization			Mitochondria;Nucleoplasm(Approved)				0.0	0.0	0.0	0.0	0.0	0.0	0.0	0.0	0.0	0.0	0.0	0.0	0.0	0.0	0.0	0.0	0.0	0.0	0.0	0.0
ENSG00000174365	128439	ensembl_gene_id	H. sapiens	128439	H. sapiens	SNHG11	small nucleolar RNA host gene 11								0.0	0.0	0.0	0.0	0.0	0.0	0.0	0.0	0.0	0.0	0.0	0.0	0.0	0.0	0.0	0.0	0.0	0.0	0.0	0.0
ENSG00000197467	1305	ensembl_gene_id	H. sapiens	1305	H. sapiens	COL13A1	collagen type XIII alpha 1 chain	GO:0001958 endochondral ossification;GO:0030574 collagen catabolic process;GO:0060350 endochondral bone morphogenesis					(M3005)NABA COLLAGENS; (M198)PID SYNDECAN 1 PATHWAY; (M160)PID AVB3 INTEGRIN PATHWAY		0.0	0.0	0.0	0.0	0.0	0.0	0.0	0.0	0.0	0.0	0.0	0.0	0.0	0.0	0.0	0.0	0.0	0.0	0.0	0.0
ENSG00000163870	131601	ensembl_gene_id	H. sapiens	131601	H. sapiens	TPRA1	transmembrane protein adipocyte associated 1	GO:0040016 embryonic cleavage;GO:1901991 negative regulation of mitotic cell cycle phase transition;GO:1901988 negative regulation of cell cycle phase transition			Vesicles(Approved)				0.0	0.0	0.0	0.0	0.0	1.0	0.0	0.0	0.0	0.0	1.0	0.0	0.0	0.0	0.0	0.0	0.0	0.0	0.0	0.0
ENSG00000206562	131965	ensembl_gene_id	H. sapiens	131965	H. sapiens	METTL6	methyltransferase like 6	GO:0032259 methylation;GO:0008152 metabolic process;GO:0008150 biological_process			Vesicles(Approved)				0.0	0.0	0.0	0.0	0.0	0.0	0.0	0.0	0.0	0.0	0.0	0.0	0.0	0.0	0.0	0.0	0.0	0.0	0.0	0.0
ENSG00000137449	132864	ensembl_gene_id	H. sapiens	132864	H. sapiens	CPEB2	cytoplasmic polyadenylation element binding protein 2	GO:1900248 negative regulation of cytoplasmic translational elongation;GO:1900247 regulation of cytoplasmic translational elongation;GO:0045900 negative regulation of translational elongation			Cytosol(Supported)Nucleoplasm(Approved)			(M5892)HALLMARK CHOLESTEROL HOMEOSTASIS	0.0	0.0	0.0	0.0	0.0	0.0	0.0	0.0	0.0	0.0	0.0	0.0	0.0	1.0	0.0	0.0	0.0	0.0	0.0	0.0
ENSG00000163633	132989	ensembl_gene_id	H. sapiens	132989	H. sapiens	C4orf36	chromosome 4 open reading frame 36				Cytosol;Focal adhesion sites(Approved)				0.0	0.0	0.0	0.0	0.0	0.0	0.0	0.0	0.0	0.0	0.0	0.0	0.0	0.0	0.0	0.0	0.0	0.0	0.0	0.0
ENSG00000164038	133308	ensembl_gene_id	H. sapiens	133308	H. sapiens	SLC9B2	solute carrier family 9 member B2	GO:2001206 positive regulation of osteoclast development;GO:2001204 regulation of osteoclast development;GO:0045672 positive regulation of osteoclast differentiation		Transporters/Electrochemical Potential-driven transporters	Cell Junctions;Nucleoplasm(Approved)				0.0	0.0	0.0	1.0	0.0	0.0	0.0	0.0	0.0	0.0	0.0	0.0	0.0	0.0	0.0	0.0	0.0	0.0	0.0	0.0
ENSG00000155846	133522	ensembl_gene_id	H. sapiens	133522	H. sapiens	PPARGC1B	PPARG coactivator 1 beta	GO:0010694 positive regulation of alkaline phosphatase activity;GO:0045672 positive regulation of osteoclast differentiation;GO:0045780 positive regulation of bone resorption			Nucleus(Supported)				1.0	0.0	0.0	0.0	0.0	0.0	0.0	0.0	0.0	0.0	0.0	0.0	1.0	0.0	0.0	0.0	0.0	0.0	0.0	0.0
ENSG00000165102	138050	ensembl_gene_id	H. sapiens	138050	H. sapiens	HGSNAT	heparan-alpha-glucosaminide N-acetyltransferase	GO:0043312 neutrophil degranulation;GO:0006027 glycosaminoglycan catabolic process;GO:0002283 neutrophil activation involved in immune response		Enzymes/ENZYME proteins/Transferases					0.0	0.0	0.0	0.0	0.0	0.0	0.0	0.0	0.0	1.0	0.0	0.0	0.0	0.0	0.0	0.0	0.0	0.0	0.0	0.0
ENSG00000166435	143570	ensembl_gene_id	H. sapiens	143570	H. sapiens	XRRA1	X-ray radiation resistance associated 1	GO:0010165 response to X-ray;GO:0010212 response to ionizing radiation;GO:0009314 response to radiation			Nuclear bodies;Nucleoplasm(Supported)				0.0	0.0	0.0	0.0	1.0	0.0	0.0	0.0	0.0	0.0	0.0	0.0	0.0	0.0	0.0	0.0	0.0	0.0	0.0	0.0
ENSG00000151292	1456	ensembl_gene_id	H. sapiens	1456	H. sapiens	CSNK1G3	casein kinase 1 gamma 3	GO:0008360 regulation of cell shape;GO:0018105 peptidyl-serine phosphorylation;GO:0018209 peptidyl-serine modification	CK1 Ser/Thr protein kinase family	Enzymes/{ENZYME proteins/Transferases,Kinases/CK1 Ser/Thr protein kinases}		Purvalanol A (Protein serine/threonine kinase activity);{(2Z)-4-AMINO-2-[(4-METHOXYPHENYL)IMINO]-2,3-DIHYDRO-1,3-THIAZOL-5-YL}(4-METHOXYPHENYL)METHANONE (Protein serine/threonine kinase activity);{[4-AMINO-2-(3-CHLOROANILINO)-1,3-THIAZOL-5-YL](4-FLUOROPHE	(M219)PID HEDGEHOG GLI PATHWAY; (M136)PID FOXO PATHWAY; (M261)PID P53 REGULATION PATHWAY		0.0	0.0	0.0	1.0	0.0	0.0	0.0	0.0	0.0	0.0	0.0	0.0	0.0	0.0	0.0	0.0	0.0	0.0	0.0	0.0
ENSG00000215769	146880	ensembl_gene_id	H. sapiens	146880	H. sapiens	ARHGAP27P1	Rho GTPase activating protein 27 pseudogene 1								0.0	0.0	0.0	0.0	0.0	0.0	0.0	0.0	0.0	0.0	0.0	0.0	0.0	0.0	0.0	0.0	0.0	0.0	0.0	0.0
ENSG00000213889	147699	ensembl_gene_id	H. sapiens	147699	H. sapiens	PPM1N	protein phosphatase, Mg2+/Mn2+ dependent 1N (putative)	GO:0006470 protein dephosphorylation;GO:0016311 dephosphorylation;GO:0006796 phosphate-containing compound metabolic process		Enzymes/ENZYME proteins/Hydrolases	Vesicles(Supported)				0.0	0.0	0.0	0.0	0.0	0.0	0.0	0.0	0.0	0.0	0.0	0.0	0.0	0.0	0.0	0.0	0.0	0.0	0.0	0.0
ENSG00000162642	148423	ensembl_gene_id	H. sapiens	148423	H. sapiens	C1orf52	chromosome 1 open reading frame 52				Nucleus(Validated)				0.0	0.0	0.0	0.0	0.0	0.0	0.0	0.0	0.0	0.0	0.0	0.0	0.0	0.0	0.0	0.0	0.0	0.0	0.0	0.0
ENSG00000183780	148641	ensembl_gene_id	H. sapiens	148641	H. sapiens	SLC35F3	solute carrier family 35 member F3	GO:0015888 thiamine transport;GO:0045117 azole transport;GO:0051180 vitamin transport		Transporters/Electrochemical Potential-driven transporters	Golgi apparatus;Nucleoli(Approved)				0.0	0.0	0.0	0.0	0.0	0.0	0.0	0.0	0.0	0.0	0.0	0.0	0.0	0.0	0.0	0.0	0.0	0.0	0.0	0.0
ENSG00000151687	150709	ensembl_gene_id	H. sapiens	150709	H. sapiens	ANKAR	ankyrin and armadillo repeat containing				Microtubule organizing center;Nucleus(Approved)				0.0	0.0	0.0	0.0	0.0	0.0	0.0	0.0	0.0	0.0	0.0	0.0	0.0	0.0	0.0	0.0	0.0	0.0	0.0	0.0
ENSG00000152117	150776	ensembl_gene_id	H. sapiens	150776	H. sapiens	LOC150776	sphingomyelin phosphodiesterase 4, neutral membrane (neutral sphingomyelinase-3) pseudogene								0.0	0.0	0.0	0.0	0.0	0.0	0.0	0.0	0.0	0.0	0.0	0.0	0.0	0.0	0.0	0.0	0.0	0.0	0.0	0.0
ENSG00000162981	151354	ensembl_gene_id	H. sapiens	151354	H. sapiens	FAM84A	family with sequence similarity 84 member A				Nucleus(Approved)				0.0	0.0	0.0	0.0	0.0	0.0	0.0	0.0	0.0	0.0	0.0	0.0	0.0	0.0	0.0	0.0	0.0	0.0	0.0	0.0
ENSG00000163328	151556	ensembl_gene_id	H. sapiens	151556	H. sapiens	GPR155	G protein-coupled receptor 155	GO:0050890 cognition;GO:0055085 transmembrane transport;GO:0050877 neurological system process			Cytosol(Approved)Nuclear bodies(Uncertain)				0.0	0.0	0.0	0.0	0.0	0.0	0.0	0.0	0.0	0.0	0.0	0.0	0.0	0.0	0.0	0.0	0.0	0.0	0.0	0.0
ENSG00000174776	151790	ensembl_gene_id	H. sapiens	151790	H. sapiens	WDR49	WD repeat domain 49								0.0	0.0	0.0	0.0	0.0	0.0	0.0	0.0	0.0	0.0	0.0	0.0	0.0	0.0	0.0	0.0	0.0	0.0	0.0	0.0
ENSG00000174899	152078	ensembl_gene_id	H. sapiens	152078	H. sapiens	PQLC2L	PQ loop repeat containing 2 like				Nuclear bodies;Nucleoplasm(Approved)				0.0	0.0	0.0	0.0	0.0	0.0	0.0	0.0	0.0	0.0	0.0	0.0	0.0	0.0	0.0	0.0	0.0	0.0	0.0	0.0
ENSG00000152492	152137	ensembl_gene_id	H. sapiens	152137	H. sapiens	CCDC50	coiled-coil domain containing 50	GO:0007605 sensory perception of sound;GO:0050954 sensory perception of mechanical stimulus;GO:0007600 sensory perception			Cytosol(Supported)				0.0	0.0	0.0	0.0	0.0	0.0	0.0	0.0	0.0	0.0	0.0	0.0	0.0	0.0	0.0	0.0	0.0	0.0	0.0	0.0
ENSG00000174796	152815	ensembl_gene_id	H. sapiens	152815	H. sapiens	THAP6	THAP domain containing 6			Transcription factors/Zinc-coordinating DNA-binding domains	Centrosome;Nucleus(Approved)				0.0	0.0	0.0	0.0	0.0	0.0	0.0	0.0	0.0	0.0	0.0	0.0	0.0	0.0	0.0	0.0	0.0	0.0	0.0	0.0
ENSG00000214510	153218	ensembl_gene_id	H. sapiens	153218	H. sapiens	SPINK13	serine peptidase inhibitor, Kazal type 13 (putative)	GO:1902225 negative regulation of acrosome reaction;GO:1900004 negative regulation of serine-type endopeptidase activity;GO:0060467 negative regulation of fertilization			Nucleus;Plasma membrane(Approved)				0.0	0.0	0.0	0.0	0.0	0.0	0.0	0.0	0.0	0.0	0.0	0.0	0.0	0.0	0.0	0.0	0.0	0.0	0.0	0.0
ENSG00000165105	158158	ensembl_gene_id	H. sapiens	158158	H. sapiens	RASEF	RAS and EF-hand domain containing	GO:0007264 small GTPase mediated signal transduction;GO:0035556 intracellular signal transduction;GO:0007165 signal transduction			Microtubules(Approved)				0.0	0.0	0.0	0.0	0.0	0.0	0.0	0.0	0.0	0.0	0.0	0.0	0.0	0.0	0.0	0.0	0.0	0.0	0.0	0.0
ENSG00000158423	158787	ensembl_gene_id	H. sapiens	158787	H. sapiens	RIBC1	RIB43A domain with coiled-coils 1				Nuclear bodies(Approved)				0.0	0.0	0.0	0.0	0.0	0.0	0.0	0.0	0.0	0.0	0.0	0.0	0.0	0.0	0.0	0.0	0.0	0.0	0.0	0.0
ENSG00000166348	159195	ensembl_gene_id	H. sapiens	159195	H. sapiens	USP54	ubiquitin specific peptidase 54	GO:0016579 protein deubiquitination;GO:0070646 protein modification by small protein removal;GO:0070647 protein modification by small protein conjugation or removal		Enzymes/Peptidases/Cysteine-type peptidases	Mitochondria(Approved)				0.0	0.0	0.0	0.0	0.0	0.0	0.0	0.0	0.0	0.0	0.0	0.0	0.0	0.0	0.0	0.0	0.0	0.0	0.0	0.0
ENSG00000196352	1604	ensembl_gene_id	H. sapiens	1604	H. sapiens	CD55	CD55 molecule (Cromer blood group)	GO:2000563 positive regulation of CD4-positive, alpha-beta T cell proliferation;GO:2000561 regulation of CD4-positive, alpha-beta T cell proliferation;GO:0046641 positive regulation of alpha-beta T cell proliferation		Blood group antigen proteins;CD markers	Midbody ring;Vesicles(Uncertain)	Chloramphenicol (Virus receptor activity)	(M14532)ST PHOSPHOINOSITIDE 3 KINASE PATHWAY	(M5921)HALLMARK COMPLEMENT; (M5932)HALLMARK INFLAMMATORY RESPONSE	0.0	0.0	0.0	0.0	0.0	0.0	0.0	0.0	0.0	0.0	0.0	0.0	0.0	0.0	0.0	0.0	0.0	0.0	0.0	0.0
ENSG00000065357	1606	ensembl_gene_id	H. sapiens	1606	H. sapiens	DGKA	diacylglycerol kinase alpha	GO:0006654 phosphatidic acid biosynthetic process;GO:0046339 diacylglycerol metabolic process;GO:0046473 phosphatidic acid metabolic process		Enzymes/ENZYME proteins/Transferases	Mitochondria;Nucleoplasm;Vesicles(Approved)	Vitamin E (Phospholipid binding)	(M60)PID NFAT TFPATHWAY	(M5939)HALLMARK P53 PATHWAY	0.0	0.0	0.0	0.0	0.0	0.0	0.0	0.0	0.0	0.0	0.0	0.0	0.0	0.0	0.0	0.0	0.0	0.0	0.0	0.0
ENSG00000172869	1657	ensembl_gene_id	H. sapiens	1657	H. sapiens	DMXL1	Dmx like 1	GO:0007035 vacuolar acidification;GO:0070072 vacuolar proton-transporting V-type ATPase complex assembly;GO:0051452 intracellular pH reduction			Cytosol;Nucleoli(Supported)				0.0	0.0	0.0	0.0	0.0	0.0	0.0	0.0	0.0	0.0	0.0	1.0	0.0	0.0	0.0	0.0	0.0	0.0	0.0	0.0
ENSG00000164329	167153	ensembl_gene_id	H. sapiens	167153	H. sapiens	PAPD4	poly(A) RNA polymerase D4, non-canonical	GO:1990603 dark adaptation;GO:0071485 cellular response to absence of light;GO:0071044 histone mRNA catabolic process		Enzymes/ENZYME proteins/Transferases	Cytosol(Approved)				0.0	0.0	0.0	0.0	1.0	0.0	0.0	0.0	0.0	0.0	0.0	0.0	0.0	0.0	0.0	0.0	0.0	0.0	0.0	1.0
ENSG00000146757	168374	ensembl_gene_id	H. sapiens	168374	H. sapiens	ZNF92	zinc finger protein 92	GO:0006355 regulation of transcription, DNA-templated;GO:1903506 regulation of nucleic acid-templated transcription;GO:0006351 transcription, DNA-templated		Transcription factors/Zinc-coordinating DNA-binding domains	Nucleus(Approved)				0.0	0.0	0.0	0.0	0.0	0.0	0.0	0.0	0.0	0.0	0.0	0.0	0.0	0.0	0.0	0.0	0.0	0.0	0.0	0.0
ENSG00000039139	1767	ensembl_gene_id	H. sapiens	1767	H. sapiens	DNAH5	dynein axonemal heavy chain 5	GO:0036158 outer dynein arm assembly;GO:0021670 lateral ventricle development;GO:0070286 axonemal dynein complex assembly							0.0	0.0	0.0	0.0	0.0	0.0	0.0	0.0	0.0	0.0	0.0	1.0	0.0	0.0	0.0	0.0	0.0	0.0	0.0	1.0
ENSG00000079805	1785	ensembl_gene_id	H. sapiens	1785	H. sapiens	DNM2	dynamin 2	GO:1903408 positive regulation of sodium:potassium-exchanging ATPase activity;GO:1903406 regulation of sodium:potassium-exchanging ATPase activity;GO:1903526 negative regulation of membrane tubulation		Enzymes/ENZYME proteins/Hydrolases	Cytosol;Golgi apparatus(Approved)		(M165)PID SYNDECAN 4 PATHWAY; (M238)PID THROMBIN PAR1 PATHWAY; (M142)PID AJDISS 2PATHWAY		1.0	0.0	0.0	1.0	1.0	1.0	1.0	1.0	0.0	0.0	1.0	1.0	0.0	0.0	0.0	0.0	1.0	0.0	0.0	0.0
ENSG00000130816	1786	ensembl_gene_id	H. sapiens	1786	H. sapiens	DNMT1	DNA methyltransferase 1	GO:0090309 positive regulation of methylation-dependent chromatin silencing;GO:0090116 C-5 methylation of cytosine;GO:0051573 negative regulation of histone H3-K9 methylation		Enzymes/ENZYME proteins/Transferases;Transcription factors/Zinc-coordinating DNA-binding domains	Nucleoplasm(Validated)	Azacitidine (Zinc ion binding);Procainamide (Zinc ion binding);Flucytosine (Zinc ion binding);Decitabine (Zinc ion binding)	(M279)PID RB 1PATHWAY	(M5925)HALLMARK E2F TARGETS	1.0	0.0	1.0	0.0	0.0	0.0	0.0	1.0	0.0	0.0	0.0	0.0	1.0	0.0	0.0	0.0	0.0	0.0	0.0	0.0
ENSG00000107614	1787	ensembl_gene_id	H. sapiens	1787	H. sapiens	TRDMT1	tRNA aspartic acid methyltransferase 1	GO:0030488 tRNA methylation;GO:0001975 response to amphetamine;GO:0014075 response to amine		Enzymes/ENZYME proteins/Transferases	Centrosome;Nucleoli;Nucleus(Approved)	Pentamidine (Trna methyltransferase activity);S-Adenosyl-L-Homocysteine (Trna methyltransferase activity);Glycerol (Trna methyltransferase activity)			0.0	0.0	0.0	0.0	0.0	0.0	0.0	0.0	0.0	0.0	0.0	0.0	0.0	0.0	0.0	0.0	0.0	0.0	0.0	0.0
ENSG00000172269	1798	ensembl_gene_id	H. sapiens	1798	H. sapiens	DPAGT1	dolichyl-phosphate N-acetylglucosaminephosphotransferase 1	GO:0006489 dolichyl diphosphate biosynthetic process;GO:0046465 dolichyl diphosphate metabolic process;GO:0019348 dolichol metabolic process		Enzymes/ENZYME proteins/Transferases					0.0	0.0	0.0	0.0	0.0	0.0	0.0	0.0	0.0	0.0	0.0	0.0	0.0	0.0	0.0	0.0	0.0	0.0	0.0	0.0
ENSG00000156976	1974	ensembl_gene_id	H. sapiens	1974	H. sapiens	EIF4A2	eukaryotic translation initiation factor 4A2	GO:1900260 negative regulation of RNA-directed 5'-3' RNA polymerase activity;GO:1900259 regulation of RNA-directed 5'-3' RNA polymerase activity;GO:0000289 nuclear-transcribed mRNA poly(A) tail shortening		Enzymes/ENZYME proteins/Hydrolases	Cytosol(Approved)			(M5922)HALLMARK UNFOLDED PROTEIN RESPONSE; (M5909)HALLMARK MYOGENESIS	0.0	0.0	0.0	0.0	0.0	0.0	0.0	0.0	0.0	0.0	0.0	0.0	0.0	0.0	0.0	0.0	0.0	0.0	0.0	0.0
ENSG00000169762	202018	ensembl_gene_id	H. sapiens	202018	H. sapiens	TAPT1	transmembrane anterior posterior transformation 1	GO:1903012 positive regulation of bone development;GO:0045724 positive regulation of cilium assembly;GO:0061036 positive regulation of cartilage development			Vesicles(Approved)				1.0	0.0	0.0	1.0	0.0	0.0	0.0	0.0	0.0	0.0	0.0	0.0	0.0	0.0	0.0	0.0	0.0	0.0	0.0	0.0
ENSG00000088367	2036	ensembl_gene_id	H. sapiens	2036	H. sapiens	EPB41L1	erythrocyte membrane protein band 4.1 like 1	GO:0030866 cortical actin cytoskeleton organization;GO:0030865 cortical cytoskeleton organization;GO:0031032 actomyosin structure organization			Plasma membrane(Supported)		(M271)PID PI3K PLC TRK PATHWAY		1.0	0.0	0.0	0.0	0.0	0.0	0.0	0.0	0.0	0.0	0.0	0.0	0.0	0.0	0.0	0.0	0.0	0.0	0.0	0.0
ENSG00000104884	2068	ensembl_gene_id	H. sapiens	2068	H. sapiens	ERCC2	ERCC excision repair 2, TFIIH core complex helicase subunit	GO:0032289 central nervous system myelin formation;GO:0043249 erythrocyte maturation;GO:0022010 central nervous system myelination		Enzymes/ENZYME proteins/Hydrolases	Nucleoplasm(Supported)			(M5938)HALLMARK REACTIVE OXIGEN SPECIES PATHWAY; (M5898)HALLMARK DNA REPAIR	1.0	1.0	0.0	1.0	1.0	1.0	0.0	0.0	0.0	0.0	1.0	1.0	0.0	0.0	0.0	0.0	0.0	0.0	1.0	0.0
ENSG00000173153	2101	ensembl_gene_id	H. sapiens	2101	H. sapiens	ESRRA	estrogen related receptor alpha	GO:1900078 positive regulation of cellular response to insulin stimulus;GO:0045670 regulation of osteoclast differentiation;GO:1900076 regulation of cellular response to insulin stimulus		Nuclear receptors;Transcription factors/Zinc-coordinating DNA-binding domains	Nucleus(Supported)Cytokinetic bridge;Microtubules;Nucleoli fibrillar center(Approved)	Troglitazone (Zinc ion binding);1-CYCLOHEXYL-N-{[1-(4-METHYLPHENYL)-1H-INDOL-3-YL]METHYL}METHANAMINE (Zinc ion binding)		(M5905)HALLMARK ADIPOGENESIS	0.0	0.0	0.0	0.0	0.0	0.0	0.0	0.0	0.0	0.0	0.0	0.0	0.0	0.0	0.0	0.0	0.0	0.0	0.0	0.0
ENSG00000106462	2146	ensembl_gene_id	H. sapiens	2146	H. sapiens	EZH2	enhancer of zeste 2 polycomb repressive complex 2 subunit	GO:0098532 histone H3-K27 trimethylation;GO:0014834 skeletal muscle satellite cell maintenance involved in skeletal muscle regeneration;GO:0034244 negative regulation of transcription elongation from RNA polymerase II promoter		Enzymes/ENZYME proteins/Transferases	Nucleoplasm(Supported)			(M5951)HALLMARK SPERMATOGENESIS; (M5901)HALLMARK G2M CHECKPOINT; (M5925)HALLMARK E2F TARGETS	0.0	0.0	1.0	1.0	0.0	0.0	0.0	0.0	0.0	0.0	1.0	0.0	0.0	1.0	0.0	0.0	0.0	0.0	1.0	1.0
ENSG00000171634	2186	ensembl_gene_id	H. sapiens	2186	H. sapiens	BPTF	bromodomain PHD finger transcription factor	GO:1990090 cellular response to nerve growth factor stimulus;GO:0001892 embryonic placenta development;GO:1990089 response to nerve growth factor			Nucleoplasm(Validated)				0.0	0.0	1.0	0.0	0.0	0.0	0.0	0.0	0.0	0.0	0.0	0.0	0.0	0.0	0.0	0.0	0.0	0.0	0.0	0.0
ENSG00000108100	219771	ensembl_gene_id	H. sapiens	219771	H. sapiens	CCNY	cyclin Y	GO:0045737 positive regulation of cyclin-dependent protein serine/threonine kinase activity;GO:1904031 positive regulation of cyclin-dependent protein kinase activity;GO:0000079 regulation of cyclin-dependent protein serine/threonine kinase activity							0.0	0.0	0.0	0.0	0.0	1.0	0.0	0.0	0.0	0.0	1.0	0.0	0.0	0.0	0.0	0.0	0.0	0.0	0.0	0.0
ENSG00000147996	220869	ensembl_gene_id	H. sapiens	220869	H. sapiens	CBWD5	COBW domain containing 5				Plasma membrane(Approved)				0.0	0.0	0.0	0.0	0.0	0.0	0.0	0.0	0.0	0.0	0.0	0.0	0.0	0.0	0.0	0.0	0.0	0.0	0.0	0.0
ENSG00000161912	221442	ensembl_gene_id	H. sapiens	221442	H. sapiens	ADCY10P1	adenylate cyclase 10, soluble pseudogene 1								0.0	0.0	0.0	0.0	0.0	0.0	0.0	0.0	0.0	0.0	0.0	0.0	0.0	0.0	0.0	0.0	0.0	0.0	0.0	0.0
ENSG00000104870	2217	ensembl_gene_id	H. sapiens	2217	H. sapiens	FCGRT	Fc fragment of IgG receptor and transporter	GO:0002416 IgG immunoglobulin transcytosis in epithelial cells mediated by FcRn immunoglobulin receptor;GO:0002414 immunoglobulin transcytosis in epithelial cells;GO:0038094 Fc-gamma receptor signaling pathway							0.0	0.0	0.0	0.0	0.0	0.0	0.0	0.0	0.0	0.0	0.0	0.0	0.0	0.0	0.0	0.0	0.0	0.0	0.0	0.0
ENSG00000102531	22862	ensembl_gene_id	H. sapiens	22862	H. sapiens	FNDC3A	fibronectin type III domain containing 3A	GO:0060009 Sertoli cell development;GO:0060008 Sertoli cell differentiation;GO:0007286 spermatid development			Endoplasmic reticulum(Approved)				0.0	0.0	0.0	0.0	0.0	0.0	0.0	0.0	0.0	0.0	0.0	0.0	0.0	0.0	0.0	0.0	0.0	0.0	0.0	0.0
ENSG00000171603	22883	ensembl_gene_id	H. sapiens	22883	H. sapiens	CLSTN1	calsyntenin 1	GO:0050806 positive regulation of synaptic transmission;GO:0051965 positive regulation of synapse assembly;GO:0051963 regulation of synapse assembly							1.0	0.0	0.0	1.0	0.0	0.0	0.0	0.0	0.0	0.0	0.0	0.0	0.0	0.0	0.0	0.0	0.0	0.0	0.0	0.0
ENSG00000110274	22897	ensembl_gene_id	H. sapiens	22897	H. sapiens	CEP164	centrosomal protein 164	GO:0097711 ciliary basal body docking;GO:0000086 G2/M transition of mitotic cell cycle;GO:0044839 cell cycle G2/M phase transition			Centrosome;Nucleoplasm(Supported)		(M46)PID ATR PATHWAY		0.0	1.0	0.0	0.0	0.0	1.0	0.0	0.0	0.0	0.0	1.0	0.0	0.0	0.0	0.0	0.0	0.0	0.0	0.0	0.0
ENSG00000018189	22902	ensembl_gene_id	H. sapiens	22902	H. sapiens	RUFY3	RUN and FYVE domain containing 3	GO:0045773 positive regulation of axon extension;GO:0050771 negative regulation of axonogenesis;GO:0050772 positive regulation of axonogenesis			Cytosol(Supported)				1.0	0.0	0.0	1.0	0.0	0.0	1.0	1.0	1.0	0.0	0.0	0.0	0.0	0.0	0.0	0.0	0.0	0.0	0.0	0.0
ENSG00000115839	22930	ensembl_gene_id	H. sapiens	22930	H. sapiens	RAB3GAP1	RAB3 GTPase activating protein catalytic subunit 1	GO:0061646 positive regulation of glutamate neurotransmitter secretion in response to membrane depolarization;GO:1903296 positive regulation of glutamate secretion, neurotransmission;GO:1903233 regulation of calcium ion-dependent exocytosis of neurotransm			Cytosol(Supported)Nucleoplasm(Approved)			(M5893)HALLMARK MITOTIC SPINDLE	1.0	0.0	0.0	0.0	0.0	0.0	1.0	0.0	0.0	0.0	0.0	0.0	0.0	1.0	0.0	0.0	0.0	0.0	0.0	1.0
ENSG00000068903	22933	ensembl_gene_id	H. sapiens	22933	H. sapiens	SIRT2	sirtuin 2	GO:1900195 positive regulation of oocyte maturation;GO:2000777 positive regulation of proteasomal ubiquitin-dependent protein catabolic process involved in cellular response to hypoxia;GO:0060282 positive regulation of oocyte development			Cytosol;Nucleoli;Nucleus(Approved)		(M32)PID HDAC CLASSIII PATHWAY; (M101)PID HDAC CLASSI PATHWAY	(M5946)HALLMARK COAGULATION; (M5909)HALLMARK MYOGENESIS	1.0	0.0	1.0	1.0	0.0	1.0	0.0	1.0	0.0	0.0	1.0	1.0	0.0	0.0	0.0	0.0	0.0	0.0	1.0	0.0
ENSG00000064042	22998	ensembl_gene_id	H. sapiens	22998	H. sapiens	LIMCH1	LIM and calponin homology domains 1	GO:0031032 actomyosin structure organization;GO:0030036 actin cytoskeleton organization;GO:0030029 actin filament-based process			Actin filaments(Approved)				1.0	0.0	0.0	0.0	0.0	0.0	0.0	0.0	0.0	0.0	0.0	0.0	0.0	0.0	0.0	0.0	0.0	0.0	0.0	0.0
ENSG00000163625	23001	ensembl_gene_id	H. sapiens	23001	H. sapiens	WDFY3	WD repeat and FYVE domain containing 3	GO:0035973 aggrephagy;GO:0016236 macroautophagy;GO:0006914 autophagy			Cytosol(Supported)Nucleoli;Plasma membrane(Uncertain)				0.0	0.0	0.0	0.0	0.0	0.0	0.0	0.0	0.0	0.0	0.0	0.0	0.0	0.0	0.0	0.0	0.0	0.0	0.0	0.0
ENSG00000065526	23013	ensembl_gene_id	H. sapiens	23013	H. sapiens	SPEN	spen family transcriptional repressor	GO:0000398 mRNA splicing, via spliceosome;GO:0000122 negative regulation of transcription from RNA polymerase II promoter;GO:0050769 positive regulation of neurogenesis			Nucleoplasm(Validated)		(M288)PID HES HEY PATHWAY; (M17)PID NOTCH PATHWAY		0.0	0.0	0.0	1.0	0.0	0.0	0.0	0.0	0.0	0.0	0.0	0.0	0.0	0.0	0.0	0.0	0.0	0.0	0.0	0.0
ENSG00000137200	23070	ensembl_gene_id	H. sapiens	23070	H. sapiens	CMTR1	cap methyltransferase 1	GO:0097309 cap1 mRNA methylation;GO:0036451 cap mRNA methylation;GO:0080009 mRNA methylation		Enzymes/ENZYME proteins/Transferases	Cytosol;Nucleoplasm(Validated)			(M5911)HALLMARK INTERFERON ALPHA RESPONSE; (M5913)HALLMARK INTERFERON GAMMA RESPONSE	0.0	0.0	0.0	0.0	0.0	0.0	0.0	0.0	0.0	0.0	0.0	0.0	0.0	0.0	0.0	0.0	0.0	0.0	0.0	0.0
ENSG00000133789	23075	ensembl_gene_id	H. sapiens	23075	H. sapiens	SWAP70	SWAP switching B-cell complex subunit 70	GO:0033633 negative regulation of cell-cell adhesion mediated by integrin;GO:0060754 positive regulation of mast cell chemotaxis;GO:1902309 negative regulation of peptidyl-serine dephosphorylation						(M5947)HALLMARK IL2 STAT5 SIGNALING	1.0	1.0	0.0	0.0	0.0	0.0	0.0	1.0	1.0	0.0	0.0	0.0	0.0	0.0	0.0	0.0	0.0	0.0	0.0	0.0
ENSG00000136068	2317	ensembl_gene_id	H. sapiens	2317	H. sapiens	FLNB	filamin B	GO:0003334 keratinocyte development;GO:0007016 cytoskeletal anchoring at plasma membrane;GO:0003382 epithelial cell morphogenesis			Cytosol;Plasma membrane(Supported)Actin filaments;Golgi apparatus(Approved)			(M5893)HALLMARK MITOTIC SPINDLE; (M5907)HALLMARK ESTROGEN RESPONSE LATE; (M5906)HALLMARK ESTROGEN RESPONSE EARLY	1.0	0.0	0.0	1.0	0.0	0.0	0.0	0.0	0.0	0.0	0.0	0.0	0.0	0.0	0.0	0.0	0.0	0.0	0.0	0.0
ENSG00000165660	23172	ensembl_gene_id	H. sapiens	23172	H. sapiens	FAM175B	family with sequence similarity 175 member B	GO:0070536 protein K63-linked deubiquitination;GO:0090307 mitotic spindle assembly;GO:0008608 attachment of spindle microtubules to kinetochore			Cytosol(Approved)				0.0	0.0	0.0	0.0	0.0	1.0	0.0	0.0	0.0	0.0	0.0	0.0	0.0	0.0	0.0	0.0	0.0	0.0	0.0	0.0
ENSG00000054654	23224	ensembl_gene_id	H. sapiens	23224	H. sapiens	SYNE2	spectrin repeat containing nuclear envelope protein 2	GO:0021817 nucleokinesis involved in cell motility in cerebral cortex radial glia guided migration;GO:0021815 modulation of microtubule cytoskeleton involved in cerebral cortex radial glia guided migration;GO:0021814 cell motility involved in cerebral cor			Nuclear membrane(Validated)				1.0	0.0	0.0	1.0	0.0	1.0	1.0	0.0	1.0	0.0	0.0	0.0	0.0	0.0	0.0	0.0	0.0	0.0	1.0	1.0
ENSG00000101745	23253	ensembl_gene_id	H. sapiens	23253	H. sapiens	ANKRD12	ankyrin repeat domain 12				Nucleoplasm(Supported)Cytosol(Approved)				0.0	0.0	0.0	0.0	0.0	0.0	0.0	0.0	0.0	0.0	0.0	0.0	0.0	0.0	0.0	0.0	0.0	0.0	0.0	0.0
ENSG00000100154	23331	ensembl_gene_id	H. sapiens	23331	H. sapiens	TTC28	tetratricopeptide repeat domain 28	GO:0007067 mitotic nuclear division;GO:0007346 regulation of mitotic cell cycle;GO:0000280 nuclear division			Mitochondria;Nucleoli(Approved)				0.0	0.0	0.0	0.0	0.0	1.0	0.0	0.0	0.0	0.0	1.0	0.0	0.0	0.0	0.0	0.0	0.0	0.0	0.0	0.0
ENSG00000101126	23394	ensembl_gene_id	H. sapiens	23394	H. sapiens	ADNP	activity dependent neuroprotector homeobox	GO:0030828 positive regulation of cGMP biosynthetic process;GO:0010835 regulation of protein ADP-ribosylation;GO:0030826 regulation of cGMP biosynthetic process		Transcription factors/{Helix-turn-helix domains,Zinc-coordinating DNA-binding domains}	Nucleoplasm(Approved)				1.0	0.0	0.0	1.0	0.0	0.0	0.0	0.0	0.0	0.0	0.0	0.0	0.0	0.0	0.0	0.0	0.0	0.0	0.0	0.0
ENSG00000180900	23513	ensembl_gene_id	H. sapiens	23513	H. sapiens	SCRIB	scribbled planar cell polarity protein	GO:0060088 auditory receptor cell stereocilium organization;GO:0098887 neurotransmitter receptor transport, endosome to postsynaptic membrane;GO:0098968 neurotransmitter receptor transport postsynaptic membrane to endosome			Cell Junctions;Nucleoplasm;Plasma membrane(Validated)Rods & Rings(Approved)				0.0	0.0	0.0	1.0	0.0	0.0	1.0	0.0	0.0	0.0	1.0	0.0	0.0	1.0	0.0	0.0	0.0	0.0	1.0	0.0
ENSG00000099991	23523	ensembl_gene_id	H. sapiens	23523	H. sapiens	CABIN1	calcineurin binding protein 1	GO:0006336 DNA replication-independent nucleosome assembly;GO:0034724 DNA replication-independent nucleosome organization;GO:0006334 nucleosome assembly			Aggresome;Cytosol;Nucleoplasm(Approved)		(M235)PID TCR CALCIUM PATHWAY; (M113)PID NFAT 3PATHWAY		0.0	0.0	1.0	0.0	0.0	0.0	0.0	0.0	0.0	0.0	0.0	0.0	0.0	0.0	0.0	0.0	0.0	0.0	0.0	0.0
ENSG00000123415	23583	ensembl_gene_id	H. sapiens	23583	H. sapiens	SMUG1	single-strand-selective monofunctional uracil-DNA glycosylase 1	GO:0045008 depyrimidination;GO:0009223 pyrimidine deoxyribonucleotide catabolic process;GO:0006244 pyrimidine nucleotide catabolic process			Vesicles(Approved)Centrosome(Uncertain)				0.0	1.0	0.0	0.0	0.0	0.0	0.0	0.0	0.0	0.0	0.0	0.0	0.0	0.0	0.0	0.0	0.0	0.0	0.0	0.0
ENSG00000101040	23613	ensembl_gene_id	H. sapiens	23613	H. sapiens	ZMYND8	zinc finger MYND-type containing 8	GO:1902952 positive regulation of dendritic spine maintenance;GO:1902897 regulation of postsynaptic density protein 95 clustering;GO:1903758 negative regulation of transcription from RNA polymerase II promoter by histone modification			Golgi apparatus;Nucleoplasm(Approved)				1.0	0.0	1.0	1.0	0.0	0.0	0.0	0.0	1.0	0.0	0.0	0.0	0.0	0.0	0.0	0.0	0.0	0.0	0.0	0.0
ENSG00000105223	23646	ensembl_gene_id	H. sapiens	23646	H. sapiens	PLD3	phospholipase D family member 3	GO:0016042 lipid catabolic process;GO:0044712 single-organism catabolic process;GO:0006629 lipid metabolic process		Enzymes/ENZYME proteins/Hydrolases			(M15743)ST GA12 PATHWAY; (M7416)ST GAQ PATHWAY; (M12645)ST GA13 PATHWAY		0.0	0.0	0.0	0.0	0.0	0.0	0.0	0.0	0.0	0.0	0.0	0.0	0.0	0.0	0.0	0.0	0.0	0.0	0.0	0.0
ENSG00000164327	253260	ensembl_gene_id	H. sapiens	253260	H. sapiens	RICTOR	RPTOR independent companion of MTOR complex 2	GO:0031295 T cell costimulation;GO:0030950 establishment or maintenance of actin cytoskeleton polarity;GO:0031294 lymphocyte costimulation			Mitochondria(Approved)		(M249)PID PI3KCI AKT PATHWAY; (M222)PID CXCR3 PATHWAY; (M71)PID ILK PATHWAY	(M5893)HALLMARK MITOTIC SPINDLE	1.0	0.0	0.0	0.0	0.0	0.0	1.0	0.0	0.0	0.0	0.0	1.0	0.0	1.0	0.0	0.0	0.0	0.0	0.0	0.0
ENSG00000180776	253832	ensembl_gene_id	H. sapiens	253832	H. sapiens	ZDHHC20	zinc finger DHHC-type containing 20	GO:0018345 protein palmitoylation;GO:0006497 protein lipidation;GO:0042158 lipoprotein biosynthetic process		Enzymes/ENZYME proteins/Transferases	Mitochondria;Plasma membrane;Vesicles(Uncertain)				0.0	0.0	0.0	0.0	0.0	0.0	0.0	0.0	0.0	0.0	0.0	0.0	0.0	0.0	0.0	0.0	0.0	0.0	0.0	0.0
ENSG00000166046	255394	ensembl_gene_id	H. sapiens	255394	H. sapiens	TCP11L2	t-complex 11 like 2				Nuclear speckles(Supported)				0.0	0.0	0.0	0.0	0.0	0.0	0.0	0.0	0.0	0.0	0.0	0.0	0.0	0.0	0.0	0.0	0.0	0.0	0.0	0.0
ENSG00000185485	255812	ensembl_gene_id	H. sapiens	255812	H. sapiens	SDHAP1	succinate dehydrogenase complex flavoprotein subunit A pseudogene 1								0.0	0.0	0.0	0.0	0.0	0.0	0.0	0.0	0.0	0.0	0.0	0.0	0.0	0.0	0.0	0.0	0.0	0.0	0.0	0.0
ENSG00000161860	256126	ensembl_gene_id	H. sapiens	256126	H. sapiens	SYCE2	synaptonemal complex central element protein 2	GO:0007130 synaptonemal complex assembly;GO:0007129 synapsis;GO:0045143 homologous chromosome segregation			Nucleus(Supported)				0.0	0.0	0.0	0.0	0.0	1.0	0.0	0.0	0.0	0.0	0.0	0.0	0.0	0.0	0.0	0.0	0.0	0.0	0.0	0.0
ENSG00000110844	25766	ensembl_gene_id	H. sapiens	25766	H. sapiens	PRPF40B	pre-mRNA processing factor 40 homolog B	GO:0000398 mRNA splicing, via spliceosome;GO:0000377 RNA splicing, via transesterification reactions with bulged adenosine as nucleophile;GO:0000375 RNA splicing, via transesterification reactions			Nuclear bodies(Supported)Aggresome;Cytosol;Nucleoplasm(Approved)				0.0	0.0	0.0	0.0	0.0	0.0	0.0	0.0	0.0	0.0	0.0	0.0	0.0	0.0	0.0	0.0	0.0	0.0	0.0	0.0
ENSG00000054983	2581	ensembl_gene_id	H. sapiens	2581	H. sapiens	GALC	galactosylceramidase	GO:0006683 galactosylceramide catabolic process;GO:0019376 galactolipid catabolic process;GO:0046477 glycosylceramide catabolic process		Enzymes/ENZYME proteins/Hydrolases				(M5910)HALLMARK PROTEIN SECRETION	0.0	0.0	0.0	0.0	0.0	0.0	0.0	0.0	0.0	1.0	0.0	0.0	0.0	0.0	0.0	0.0	0.0	0.0	0.0	0.0
ENSG00000154175	25890	ensembl_gene_id	H. sapiens	25890	H. sapiens	ABI3BP	ABI family member 3 binding protein	GO:0010811 positive regulation of cell-substrate adhesion;GO:0010810 regulation of cell-substrate adhesion;GO:0045785 positive regulation of cell adhesion			Centrosome;Cytosol;Nuclear speckles;Nucleoli(Uncertain)		(M3008)NABA ECM GLYCOPROTEINS; (M5884)NABA CORE MATRISOME; (M5889)NABA MATRISOME	(M5930)HALLMARK EPITHELIAL MESENCHYMAL TRANSITION	0.0	0.0	0.0	0.0	0.0	0.0	0.0	0.0	0.0	0.0	0.0	0.0	0.0	0.0	0.0	0.0	0.0	0.0	0.0	0.0
ENSG00000176225	25914	ensembl_gene_id	H. sapiens	25914	H. sapiens	RTTN	rotatin	GO:0044782 cilium organization;GO:0030030 cell projection organization;GO:1902589 single-organism organelle organization							0.0	0.0	0.0	0.0	0.0	0.0	0.0	0.0	0.0	0.0	0.0	0.0	0.0	0.0	0.0	0.0	0.0	0.0	0.0	0.0
ENSG00000129493	25938	ensembl_gene_id	H. sapiens	25938	H. sapiens	HEATR5A	HEAT repeat containing 5A								0.0	0.0	0.0	0.0	0.0	0.0	0.0	0.0	0.0	0.0	0.0	0.0	0.0	0.0	0.0	0.0	0.0	0.0	0.0	0.0
ENSG00000070882	26031	ensembl_gene_id	H. sapiens	26031	H. sapiens	OSBPL3	oxysterol binding protein like 3	GO:0006699 bile acid biosynthetic process;GO:0008206 bile acid metabolic process;GO:0015918 sterol transport			Cytosol;Nucleoli(Supported)				0.0	0.0	0.0	0.0	0.0	0.0	0.0	0.0	0.0	0.0	0.0	0.0	0.0	0.0	0.0	0.0	0.0	0.0	0.0	0.0
ENSG00000148634	26091	ensembl_gene_id	H. sapiens	26091	H. sapiens	HERC4	HECT and RLD domain containing E3 ubiquitin protein ligase 4	GO:0007283 spermatogenesis;GO:0048232 male gamete generation;GO:0016567 protein ubiquitination			Cytosol(Supported)Nucleoli fibrillar center(Approved)				0.0	0.0	0.0	0.0	0.0	0.0	0.0	0.0	0.0	0.0	0.0	0.0	0.0	0.0	0.0	0.0	0.0	0.0	0.0	0.0
ENSG00000165219	26130	ensembl_gene_id	H. sapiens	26130	H. sapiens	GAPVD1	GTPase activating protein and VPS9 domains 1	GO:0043547 positive regulation of GTPase activity;GO:0051223 regulation of protein transport;GO:0043087 regulation of GTPase activity			Cytosol(Supported)			(M5945)HALLMARK HEME METABOLISM	0.0	0.0	0.0	0.0	0.0	0.0	0.0	0.0	0.0	0.0	0.0	0.0	0.0	1.0	0.0	0.0	0.0	0.0	0.0	0.0
ENSG00000131697	261734	ensembl_gene_id	H. sapiens	261734	H. sapiens	NPHP4	nephrocystin 4	GO:1903348 positive regulation of bicellular tight junction assembly;GO:2000810 regulation of bicellular tight junction assembly;GO:0035845 photoreceptor cell outer segment organization							1.0	0.0	0.0	0.0	1.0	0.0	0.0	0.0	0.0	0.0	0.0	0.0	1.0	0.0	0.0	0.0	0.0	0.0	0.0	0.0
ENSG00000118564	26234	ensembl_gene_id	H. sapiens	26234	H. sapiens	FBXL5	F-box and leucine rich repeat protein 5	GO:0031146 SCF-dependent proteasomal ubiquitin-dependent protein catabolic process;GO:0055072 iron ion homeostasis;GO:1903364 positive regulation of cellular protein catabolic process							0.0	0.0	0.0	0.0	0.0	0.0	0.0	0.0	0.0	0.0	0.0	0.0	0.0	0.0	0.0	0.0	0.0	0.0	0.0	0.0
ENSG00000153292	266977	ensembl_gene_id	H. sapiens	266977	H. sapiens	ADGRF1	adhesion G protein-coupled receptor F1	GO:0007186 G-protein coupled receptor signaling pathway;GO:0007166 cell surface receptor signaling pathway;GO:0007165 signal transduction		G-protein coupled receptors/{Family 2 (B) receptors,GPCRs excl olfactory receptors}		751689 (G-protein coupled receptor activity)			0.0	0.0	0.0	0.0	0.0	0.0	0.0	0.0	0.0	0.0	0.0	0.0	0.0	0.0	0.0	0.0	0.0	0.0	0.0	0.0
ENSG00000105856	26959	ensembl_gene_id	H. sapiens	26959	H. sapiens	HBP1	HMG-box transcription factor 1	GO:0007050 cell cycle arrest;GO:0016055 Wnt signaling pathway;GO:0198738 cell-cell signaling by wnt		Transcription factors/Other all-alpha-helical DNA-binding domains	Nuclear speckles(Validated)		(M139)PID MYC PATHWAY; (M229)PID P38 ALPHA BETA DOWNSTREAM PATHWAY; (M236)PID DELTA NP63 PATHWAY		0.0	0.0	0.0	0.0	0.0	0.0	0.0	0.0	0.0	0.0	1.0	0.0	0.0	0.0	0.0	0.0	0.0	0.0	0.0	0.0
ENSG00000119684	27030	ensembl_gene_id	H. sapiens	27030	H. sapiens	MLH3	mutL homolog 3	GO:0007130 synaptonemal complex assembly;GO:0007144 female meiosis I;GO:0007129 synapsis			Nucleus(Approved)				0.0	1.0	0.0	0.0	0.0	1.0	0.0	0.0	0.0	0.0	0.0	0.0	0.0	0.0	0.0	0.0	0.0	0.0	0.0	0.0
ENSG00000151498	27034	ensembl_gene_id	H. sapiens	27034	H. sapiens	ACAD8	acyl-CoA dehydrogenase family member 8	GO:0006574 valine catabolic process;GO:0009083 branched-chain amino acid catabolic process;GO:0006573 valine metabolic process				Methacrylyl-Coenzyme A (Oxidoreductase activity, acting on the ch-ch group of donors, with a flavin as acceptor);Flavin adenine dinucleotide (Oxidoreductase activity, acting on the ch-ch group of donors, with a flavin as acceptor)			0.0	0.0	0.0	0.0	0.0	0.0	0.0	0.0	0.0	0.0	0.0	0.0	0.0	0.0	0.0	0.0	0.0	0.0	0.0	0.0
ENSG00000040341	27067	ensembl_gene_id	H. sapiens	27067	H. sapiens	STAU2	staufen double-stranded RNA binding protein 2	GO:0006810 transport;GO:0051234 establishment of localization;GO:0051179 localization			Cytosol;Nucleoplasm(Supported)				0.0	0.0	0.0	0.0	0.0	0.0	0.0	0.0	0.0	0.0	0.0	0.0	0.0	0.0	0.0	0.0	0.0	0.0	0.0	0.0
ENSG00000090905	27327	ensembl_gene_id	H. sapiens	27327	H. sapiens	TNRC6A	trinucleotide repeat containing 6A	GO:0035278 miRNA mediated inhibition of translation;GO:0040033 negative regulation of translation, ncRNA-mediated;GO:0007223 Wnt signaling pathway, calcium modulating pathway			Vesicles(Supported)Golgi apparatus(Approved)Nucleoplasm(Uncertain)				0.0	0.0	0.0	0.0	0.0	0.0	0.0	0.0	0.0	0.0	0.0	0.0	0.0	0.0	0.0	0.0	0.0	0.0	0.0	0.0
ENSG00000173905	27333	ensembl_gene_id	H. sapiens	27333	H. sapiens	GOLIM4	golgi integral membrane protein 4	GO:0006810 transport;GO:0051234 establishment of localization;GO:0051179 localization			Golgi apparatus(Validated)				0.0	0.0	0.0	0.0	0.0	0.0	0.0	0.0	0.0	0.0	0.0	0.0	0.0	0.0	0.0	0.0	0.0	0.0	0.0	0.0
ENSG00000250571	2738	ensembl_gene_id	H. sapiens	2738	H. sapiens	GLI4	GLI family zinc finger 4	GO:0006355 regulation of transcription, DNA-templated;GO:1903506 regulation of nucleic acid-templated transcription;GO:0006351 transcription, DNA-templated		Transcription factors/Zinc-coordinating DNA-binding domains	Cytokinetic bridge;Nucleus(Approved)				0.0	0.0	0.0	0.0	0.0	0.0	0.0	0.0	0.0	0.0	0.0	0.0	0.0	0.0	0.0	0.0	0.0	0.0	0.0	0.0
ENSG00000167110	2801	ensembl_gene_id	H. sapiens	2801	H. sapiens	GOLGA2	golgin A2	GO:0060050 positive regulation of protein glycosylation;GO:0048208 COPII vesicle coating;GO:0090166 Golgi disassembly			Golgi apparatus(Validated)		(M129)PID PLK1 PATHWAY		1.0	0.0	0.0	0.0	0.0	1.0	1.0	0.0	0.0	0.0	0.0	1.0	0.0	0.0	0.0	0.0	0.0	0.0	0.0	0.0
ENSG00000162241	283130	ensembl_gene_id	H. sapiens	283130	H. sapiens	SLC25A45	solute carrier family 25 member 45	GO:0000066 mitochondrial ornithine transport;GO:0015822 ornithine transport;GO:0006865 amino acid transport		Transporters/Electrochemical Potential-driven transporters	Cytosol;Nucleoplasm(Approved)				0.0	0.0	0.0	0.0	0.0	0.0	0.0	0.0	0.0	0.0	0.0	0.0	0.0	0.0	0.0	0.0	0.0	0.0	0.0	0.0
ENSG00000188997	283219	ensembl_gene_id	H. sapiens	283219	H. sapiens	KCTD21	potassium channel tetramerization domain containing 21	GO:0051260 protein homooligomerization;GO:0051259 protein oligomerization;GO:0006461 protein complex assembly			Cytosol(Approved)				0.0	0.0	0.0	0.0	0.0	0.0	0.0	0.0	0.0	0.0	0.0	0.0	0.0	0.0	0.0	0.0	0.0	0.0	0.0	0.0
ENSG00000172824	283848	ensembl_gene_id	H. sapiens	283848	H. sapiens	CES4A	carboxylesterase 4A				Cytosol(Approved)		(M40)PID E2F PATHWAY		0.0	0.0	0.0	0.0	0.0	0.0	0.0	0.0	0.0	0.0	0.0	0.0	0.0	0.0	0.0	0.0	0.0	0.0	0.0	0.0
ENSG00000120071	284058	ensembl_gene_id	H. sapiens	284058	H. sapiens	KANSL1	KAT8 regulatory NSL complex subunit 1	GO:0043982 histone H4-K8 acetylation;GO:0043981 histone H4-K5 acetylation;GO:0043984 histone H4-K16 acetylation			Nucleoplasm(Supported)				0.0	0.0	1.0	0.0	0.0	0.0	0.0	0.0	0.0	0.0	0.0	0.0	0.0	0.0	0.0	0.0	0.0	0.0	0.0	0.0
ENSG00000181045	284129	ensembl_gene_id	H. sapiens	284129	H. sapiens	SLC26A11	solute carrier family 26 member 11	GO:0019532 oxalate transport;GO:1902358 sulfate transmembrane transport;GO:0051453 regulation of intracellular pH		Transporters/Electrochemical Potential-driven transporters	Vesicles(Supported)Golgi apparatus;Nucleoplasm(Approved)				0.0	0.0	0.0	0.0	0.0	0.0	0.0	0.0	0.0	0.0	0.0	0.0	0.0	0.0	0.0	0.0	0.0	0.0	0.0	0.0
ENSG00000173818	284131	ensembl_gene_id	H. sapiens	284131	H. sapiens	ENDOV	endonuclease V	GO:0090502 RNA phosphodiester bond hydrolysis, endonucleolytic;GO:0090501 RNA phosphodiester bond hydrolysis;GO:0090305 nucleic acid phosphodiester bond hydrolysis							0.0	1.0	0.0	0.0	0.0	0.0	0.0	0.0	0.0	0.0	0.0	0.0	0.0	0.0	0.0	0.0	0.0	0.0	0.0	0.0
ENSG00000188004	284677	ensembl_gene_id	H. sapiens	284677	H. sapiens	C1orf204	chromosome 1 open reading frame 204				Nucleoplasm(Uncertain)				0.0	0.0	0.0	0.0	0.0	0.0	0.0	0.0	0.0	0.0	0.0	0.0	0.0	0.0	0.0	0.0	0.0	0.0	0.0	0.0
ENSG00000075539	285527	ensembl_gene_id	H. sapiens	285527	H. sapiens	FRYL	FRY like transcription coactivator	GO:0090527 actin filament reorganization;GO:0031532 actin cytoskeleton reorganization;GO:0007015 actin filament organization			Cytokinetic bridge;Cytosol;Microtubules(Approved)				1.0	0.0	0.0	0.0	0.0	0.0	0.0	0.0	0.0	0.0	0.0	0.0	0.0	0.0	0.0	0.0	0.0	0.0	0.0	0.0
ENSG00000168079	286133	ensembl_gene_id	H. sapiens	286133	H. sapiens	SCARA5	scavenger receptor class A member 5	GO:0034755 iron ion transmembrane transport;GO:0070207 protein homotrimerization;GO:0006879 cellular iron ion homeostasis							0.0	0.0	0.0	0.0	0.0	0.0	0.0	0.0	0.0	0.0	0.0	0.0	0.0	0.0	0.0	0.0	0.0	0.0	0.0	0.0
ENSG00000125388	2868	ensembl_gene_id	H. sapiens	2868	H. sapiens	GRK4	G protein-coupled receptor kinase 4	GO:0022400 regulation of rhodopsin mediated signaling pathway;GO:0002031 G-protein coupled receptor internalization;GO:0016056 rhodopsin mediated signaling pathway	AGC Ser/Thr protein kinase family	Enzymes/{ENZYME proteins/Transferases,Kinases/AGC Ser/Thr protein kinases}	Vesicles(Supported)				0.0	0.0	0.0	0.0	1.0	0.0	0.0	0.0	0.0	0.0	0.0	0.0	0.0	0.0	0.0	0.0	1.0	0.0	0.0	0.0
ENSG00000141738	2886	ensembl_gene_id	H. sapiens	2886	H. sapiens	GRB7	growth factor receptor bound protein 7	GO:0038128 ERBB2 signaling pathway;GO:0034063 stress granule assembly;GO:0007411 axon guidance			Plasma membrane(Supported)		(M82)PID RET PATHWAY; (M62)PID EPHB FWD PATHWAY; (M92)PID ANGIOPOIETIN RECEPTOR PATHWAY	(M5915)HALLMARK APICAL JUNCTION	0.0	0.0	0.0	1.0	0.0	0.0	0.0	0.0	1.0	0.0	0.0	0.0	0.0	0.0	0.0	0.0	0.0	0.0	0.0	0.0
ENSG00000106070	2887	ensembl_gene_id	H. sapiens	2887	H. sapiens	GRB10	growth factor receptor bound protein 10	GO:0046325 negative regulation of glucose import;GO:0046627 negative regulation of insulin receptor signaling pathway;GO:0010829 negative regulation of glucose transport			Nuclear membrane;Vesicles(Approved)		(M125)PID IGF1 PATHWAY; (M82)PID RET PATHWAY; (M16)PID INSULIN PATHWAY		0.0	0.0	0.0	1.0	0.0	0.0	0.0	0.0	0.0	0.0	0.0	0.0	0.0	0.0	0.0	0.0	0.0	0.0	0.0	0.0
ENSG00000177646	28976	ensembl_gene_id	H. sapiens	28976	H. sapiens	ACAD9	acyl-CoA dehydrogenase family member 9	GO:0032981 mitochondrial respiratory chain complex I assembly;GO:0010257 NADH dehydrogenase complex assembly;GO:0097031 mitochondrial respiratory chain complex I biogenesis			Mitochondria(Validated)				0.0	0.0	0.0	0.0	0.0	0.0	0.0	0.0	0.0	0.0	0.0	1.0	0.0	0.0	0.0	0.0	0.0	0.0	0.0	0.0
ENSG00000138382	29081	ensembl_gene_id	H. sapiens	29081	H. sapiens	METTL5	methyltransferase like 5	GO:0032259 methylation;GO:0008152 metabolic process;GO:0008150 biological_process			Cytosol;Nucleoli(Approved)				0.0	0.0	0.0	0.0	0.0	0.0	0.0	0.0	0.0	0.0	0.0	0.0	0.0	0.0	0.0	0.0	0.0	0.0	0.0	0.0
ENSG00000170899	2941	ensembl_gene_id	H. sapiens	2941	H. sapiens	GSTA4	glutathione S-transferase alpha 4	GO:1901687 glutathione derivative biosynthetic process;GO:1901685 glutathione derivative metabolic process;GO:0006805 xenobiotic metabolic process		Enzymes/ENZYME proteins/Transferases		Glutathione (Protein homodimerization activity)			0.0	0.0	0.0	0.0	0.0	0.0	0.0	0.0	0.0	0.0	0.0	0.0	0.0	0.0	0.0	0.0	0.0	0.0	0.0	0.0
ENSG00000197265	2961	ensembl_gene_id	H. sapiens	2961	H. sapiens	GTF2E2	general transcription factor IIE subunit 2	GO:0042795 snRNA transcription from RNA polymerase II promoter;GO:0009301 snRNA transcription;GO:0006368 transcription elongation from RNA polymerase II promoter			Nucleoplasm(Validated)Cytosol(Supported)				0.0	0.0	0.0	0.0	0.0	0.0	0.0	0.0	0.0	0.0	0.0	0.0	0.0	0.0	0.0	0.0	0.0	0.0	0.0	0.0
ENSG00000155313	29761	ensembl_gene_id	H. sapiens	29761	H. sapiens	USP25	ubiquitin specific peptidase 25	GO:1904293 negative regulation of ERAD pathway;GO:1904292 regulation of ERAD pathway;GO:0070536 protein K63-linked deubiquitination		Enzymes/{ENZYME proteins/Hydrolases,Peptidases/Cysteine-type peptidases}	Cytosol(Supported)				0.0	0.0	0.0	0.0	0.0	0.0	0.0	0.0	0.0	0.0	0.0	0.0	0.0	0.0	0.0	0.0	0.0	0.0	0.0	0.0
ENSG00000164548	29896	ensembl_gene_id	H. sapiens	29896	H. sapiens	TRA2A	transformer 2 alpha homolog	GO:0000398 mRNA splicing, via spliceosome;GO:0000377 RNA splicing, via transesterification reactions with bulged adenosine as nucleophile;GO:0000375 RNA splicing, via transesterification reactions			Nucleoli;Vesicles(Supported)				0.0	0.0	0.0	0.0	0.0	0.0	0.0	0.0	0.0	0.0	0.0	0.0	0.0	0.0	0.0	0.0	0.0	0.0	0.0	0.0
ENSG00000169919	2990	ensembl_gene_id	H. sapiens	2990	H. sapiens	GUSB	glucuronidase beta	GO:0030214 hyaluronan catabolic process;GO:0030212 hyaluronan metabolic process;GO:0043312 neutrophil degranulation		Enzymes/ENZYME proteins/Hydrolases	Vesicles(Supported)			(M5892)HALLMARK CHOLESTEROL HOMEOSTASIS; (M5937)HALLMARK GLYCOLYSIS	0.0	0.0	0.0	0.0	0.0	0.0	0.0	0.0	0.0	1.0	0.0	0.0	0.0	0.0	0.0	0.0	0.0	0.0	0.0	0.0
ENSG00000111727	29915	ensembl_gene_id	H. sapiens	29915	H. sapiens	HCFC2	host cell factor C2	GO:0000122 negative regulation of transcription from RNA polymerase II promoter;GO:0045892 negative regulation of transcription, DNA-templated;GO:0016032 viral process			Nucleoplasm(Supported)Cytosol;Plasma membrane(Approved)		(M5883)NABA SECRETED FACTORS; (M5885)NABA MATRISOME ASSOCIATED; (M5889)NABA MATRISOME		0.0	0.0	0.0	0.0	0.0	0.0	0.0	0.0	0.0	0.0	0.0	0.0	0.0	0.0	0.0	0.0	0.0	0.0	0.0	0.0
ENSG00000205476	317762	ensembl_gene_id	H. sapiens	317762	H. sapiens	CCDC85C	coiled-coil domain containing 85C	GO:0021987 cerebral cortex development;GO:0021543 pallium development;GO:0021537 telencephalon development			Cell Junctions;Nuclear speckles(Approved)				0.0	0.0	0.0	0.0	0.0	0.0	0.0	0.0	0.0	0.0	0.0	0.0	0.0	0.0	0.0	0.0	0.0	0.0	0.0	1.0
ENSG00000163697	323	ensembl_gene_id	H. sapiens	323	H. sapiens	APBB2	amyloid beta precursor protein binding family B member 2	GO:0007411 axon guidance;GO:0097485 neuron projection guidance;GO:0007409 axonogenesis			Mitochondria(Approved)			(M5942)HALLMARK UV RESPONSE DN	0.0	0.0	0.0	1.0	0.0	0.0	0.0	0.0	0.0	0.0	1.0	0.0	0.0	0.0	0.0	0.0	0.0	0.0	0.0	0.0
ENSG00000144228	339745	ensembl_gene_id	H. sapiens	339745	H. sapiens	SPOPL	speckle type BTB/POZ protein like	GO:0031397 negative regulation of protein ubiquitination;GO:0042787 protein ubiquitination involved in ubiquitin-dependent protein catabolic process;GO:1903321 negative regulation of protein modification by small protein conjugation or removal			Vesicles(Approved)				0.0	0.0	0.0	0.0	0.0	0.0	0.0	0.0	0.0	0.0	0.0	0.0	0.0	0.0	0.0	0.0	0.0	0.0	0.0	0.0
ENSG00000184584	340061	ensembl_gene_id	H. sapiens	340061	H. sapiens	TMEM173	transmembrane protein 173	GO:0033160 positive regulation of protein import into nucleus, translocation;GO:0033158 regulation of protein import into nucleus, translocation;GO:0002230 positive regulation of defense response to virus by host			Cytosol(Supported)				0.0	0.0	0.0	0.0	0.0	0.0	0.0	0.0	0.0	0.0	0.0	0.0	0.0	0.0	0.0	0.0	0.0	0.0	0.0	0.0
ENSG00000186312	340591	ensembl_gene_id	H. sapiens	340591	H. sapiens	CA5BP1	carbonic anhydrase 5B pseudogene 1								0.0	0.0	0.0	0.0	0.0	0.0	0.0	0.0	0.0	0.0	0.0	0.0	0.0	0.0	0.0	0.0	0.0	0.0	0.0	0.0
ENSG00000010404	3423	ensembl_gene_id	H. sapiens	3423	H. sapiens	IDS	iduronate 2-sulfatase	GO:0030207 chondroitin sulfate catabolic process;GO:0030204 chondroitin sulfate metabolic process;GO:0006027 glycosaminoglycan catabolic process		Enzymes/ENZYME proteins/Hydrolases				(M5891)HALLMARK HYPOXIA	0.0	0.0	0.0	0.0	0.0	0.0	0.0	0.0	0.0	1.0	0.0	0.0	0.0	0.0	0.0	0.0	0.0	0.0	0.0	0.0
ENSG00000132740	3508	ensembl_gene_id	H. sapiens	3508	H. sapiens	IGHMBP2	immunoglobulin mu binding protein 2	GO:0032508 DNA duplex unwinding;GO:0032392 DNA geometric change;GO:0051260 protein homooligomerization		Enzymes/ENZYME proteins/Hydrolases	Nucleus(Approved)				0.0	1.0	0.0	0.0	0.0	0.0	0.0	0.0	0.0	0.0	0.0	0.0	0.0	0.0	0.0	0.0	0.0	0.0	0.0	0.0
ENSG00000095752	3589	ensembl_gene_id	H. sapiens	3589	H. sapiens	IL11	interleukin 11	GO:1903659 regulation of complement-dependent cytotoxicity;GO:2000352 negative regulation of endothelial cell apoptotic process;GO:0097278 complement-dependent cytotoxicity			Mitochondria(Uncertain)		(M5883)NABA SECRETED FACTORS; (M5885)NABA MATRISOME ASSOCIATED; (M5889)NABA MATRISOME	(M5950)HALLMARK ALLOGRAFT REJECTION	0.0	0.0	0.0	0.0	0.0	0.0	0.0	0.0	0.0	0.0	0.0	0.0	0.0	0.0	0.0	0.0	0.0	0.0	0.0	0.0
ENSG00000166333	3611	ensembl_gene_id	H. sapiens	3611	H. sapiens	ILK	integrin linked kinase	GO:0001658 branching involved in ureteric bud morphogenesis;GO:0060675 ureteric bud morphogenesis;GO:0045773 positive regulation of axon extension	TKL Ser/Thr protein kinase family	Enzymes/{ENZYME proteins/Transferases,Kinases/TKL Ser/Thr protein kinases}	Cell Junctions;Focal adhesion sites(Validated)		(M12771)SA PTEN PATHWAY; (M63)PID AVB3 OPN PATHWAY; (M71)PID ILK PATHWAY		1.0	0.0	0.0	1.0	0.0	0.0	1.0	0.0	1.0	0.0	1.0	0.0	0.0	0.0	0.0	0.0	0.0	0.0	1.0	0.0
ENSG00000149503	3619	ensembl_gene_id	H. sapiens	3619	H. sapiens	INCENP	inner centromere protein	GO:0016925 protein sumoylation;GO:0007062 sister chromatid cohesion;GO:0000819 sister chromatid segregation			Midbody;Nuclear bodies;Nucleus(Supported)	N~6~-cyclohexyl-N~2~-(4-morpholin-4-ylphenyl)-9H-purine-2,6-diamine	(M14)PID AURORA B PATHWAY; (M129)PID PLK1 PATHWAY; (M223)PID BETA CATENIN NUC PATHWAY	(M5901)HALLMARK G2M CHECKPOINT; (M5893)HALLMARK MITOTIC SPINDLE	0.0	0.0	1.0	0.0	0.0	1.0	0.0	0.0	0.0	0.0	0.0	0.0	0.0	0.0	0.0	0.0	0.0	0.0	0.0	0.0
ENSG00000125347	3659	ensembl_gene_id	H. sapiens	3659	H. sapiens	IRF1	interferon regulatory factor 1	GO:0034124 regulation of MyD88-dependent toll-like receptor signaling pathway;GO:0045590 negative regulation of regulatory T cell differentiation;GO:2000564 regulation of CD8-positive, alpha-beta T cell proliferation		Transcription factors/Helix-turn-helix domains	Cytosol;Nucleoplasm(Supported)		(M290)PID IL12 STAT4 PATHWAY; (M161)PID IFNG PATHWAY; (M183)PID IL6 7 PATHWAY	(M5897)HALLMARK IL6 JAK STAT3 SIGNALING; (M5911)HALLMARK INTERFERON ALPHA RESPONSE; (M5941)HALLMARK UV RESPONSE UP	0.0	0.0	0.0	0.0	0.0	0.0	0.0	0.0	0.0	0.0	1.0	0.0	0.0	0.0	0.0	0.0	0.0	0.0	0.0	0.0
ENSG00000135976	375248	ensembl_gene_id	H. sapiens	375248	H. sapiens	ANKRD36	ankyrin repeat domain 36				Cytosol;Nucleus(Approved)				0.0	0.0	0.0	0.0	0.0	0.0	0.0	0.0	0.0	0.0	0.0	0.0	0.0	0.0	0.0	0.0	0.0	0.0	0.0	0.0
ENSG00000241549	387036	ensembl_gene_id	H. sapiens	387036	H. sapiens	GUSBP2	glucuronidase, beta pseudogene 2								0.0	0.0	0.0	0.0	0.0	0.0	0.0	0.0	0.0	0.0	0.0	0.0	0.0	0.0	0.0	0.0	0.0	0.0	0.0	0.0
ENSG00000196569	3908	ensembl_gene_id	H. sapiens	3908	H. sapiens	LAMA2	laminin subunit alpha 2	GO:0032224 positive regulation of synaptic transmission, cholinergic;GO:0032222 regulation of synaptic transmission, cholinergic;GO:0014037 Schwann cell differentiation					(M158)PID INTEGRIN4 PATHWAY; (M5887)NABA BASEMENT MEMBRANES; (M239)PID A6B1 A6B4 INTEGRIN PATHWAY	(M5930)HALLMARK EPITHELIAL MESENCHYMAL TRANSITION; (M5909)HALLMARK MYOGENESIS	0.0	0.0	0.0	1.0	0.0	0.0	0.0	0.0	1.0	0.0	0.0	0.0	0.0	0.0	0.0	0.0	0.0	0.0	1.0	0.0
ENSG00000005893	3920	ensembl_gene_id	H. sapiens	3920	H. sapiens	LAMP2	lysosomal associated membrane protein 2	GO:0061740 protein targeting to lysosome involved in chaperone-mediated autophagy;GO:0071211 protein targeting to vacuole involved in autophagy;GO:1905146 lysosomal protein catabolic process		CD markers;Transporters				(M5910)HALLMARK PROTEIN SECRETION; (M5946)HALLMARK COAGULATION; (M5921)HALLMARK COMPLEMENT	0.0	0.0	0.0	0.0	0.0	0.0	0.0	0.0	0.0	1.0	0.0	0.0	1.0	0.0	0.0	0.0	0.0	0.0	0.0	0.0
ENSG00000179818	400960	ensembl_gene_id	H. sapiens	400960	H. sapiens	PCBP1-AS1	PCBP1 antisense RNA 1								0.0	0.0	0.0	0.0	0.0	0.0	0.0	0.0	0.0	0.0	0.0	0.0	0.0	0.0	0.0	0.0	0.0	0.0	0.0	0.0
ENSG00000223773	401577	ensembl_gene_id	H. sapiens	401577	H. sapiens	CD99P1	CD99 molecule pseudogene 1								0.0	0.0	0.0	0.0	0.0	0.0	0.0	0.0	0.0	0.0	0.0	0.0	0.0	0.0	0.0	0.0	0.0	0.0	0.0	0.0
ENSG00000119979	404636	ensembl_gene_id	H. sapiens	404636	H. sapiens	FAM45A	family with sequence similarity 45 member A				Centrosome;Cytosol;Plasma membrane(Approved)				0.0	0.0	0.0	0.0	0.0	0.0	0.0	0.0	0.0	0.0	0.0	0.0	0.0	0.0	0.0	0.0	0.0	0.0	0.0	0.0
ENSG00000049323	4052	ensembl_gene_id	H. sapiens	4052	H. sapiens	LTBP1	latent transforming growth factor beta binding protein 1	GO:0035583 sequestering of TGFbeta in extracellular matrix;GO:0035581 sequestering of extracellular ligand from receptor;GO:0071694 maintenance of protein location in extracellular region			Cytosol(Approved)		(M3008)NABA ECM GLYCOPROTEINS; (M5884)NABA CORE MATRISOME; (M5889)NABA MATRISOME	(M5942)HALLMARK UV RESPONSE DN	0.0	0.0	0.0	0.0	0.0	0.0	0.0	0.0	0.0	0.0	0.0	0.0	0.0	0.0	0.0	0.0	0.0	0.0	0.0	0.0
ENSG00000162385	4116	ensembl_gene_id	H. sapiens	4116	H. sapiens	MAGOH	mago homolog, exon junction complex core component	GO:0006406 mRNA export from nucleus;GO:0000381 regulation of alternative mRNA splicing, via spliceosome;GO:0071427 mRNA-containing ribonucleoprotein complex export from nucleus		Transporters/Primary Active Transporters	Nucleus(Supported)				0.0	0.0	0.0	0.0	0.0	0.0	0.0	0.0	0.0	0.0	0.0	0.0	0.0	0.0	0.0	0.0	0.0	0.0	0.0	0.0
ENSG00000111885	4121	ensembl_gene_id	H. sapiens	4121	H. sapiens	MAN1A1	mannosidase alpha class 1A member 1	GO:1904381 Golgi apparatus mannose trimming;GO:0036508 protein alpha-1,2-demannosylation;GO:0036507 protein demannosylation		Enzymes/ENZYME proteins/Hydrolases	Golgi apparatus(Supported)Cytosol(Approved)			(M5934)HALLMARK XENOBIOTIC METABOLISM	0.0	0.0	0.0	0.0	0.0	0.0	0.0	0.0	0.0	0.0	0.0	0.0	0.0	0.0	0.0	0.0	0.0	0.0	0.0	0.0
ENSG00000104774	4125	ensembl_gene_id	H. sapiens	4125	H. sapiens	MAN2B1	mannosidase alpha class 2B member 1	GO:0006013 mannose metabolic process;GO:0009313 oligosaccharide catabolic process;GO:0043312 neutrophil degranulation		Enzymes/ENZYME proteins/Hydrolases	Vesicles(Supported)Nucleoplasm(Uncertain)				0.0	0.0	0.0	0.0	0.0	0.0	0.0	0.0	0.0	1.0	0.0	0.0	0.0	0.0	0.0	0.0	0.0	0.0	0.0	0.0
ENSG00000109323	4126	ensembl_gene_id	H. sapiens	4126	H. sapiens	MANBA	mannosidase beta	GO:0009313 oligosaccharide catabolic process;GO:0043312 neutrophil degranulation;GO:0002283 neutrophil activation involved in immune response		Enzymes/ENZYME proteins/Hydrolases	Vesicles(Supported)				0.0	0.0	0.0	0.0	0.0	0.0	0.0	0.0	0.0	1.0	0.0	0.0	0.0	0.0	0.0	0.0	0.0	0.0	0.0	0.0
ENSG00000152601	4154	ensembl_gene_id	H. sapiens	4154	H. sapiens	MBNL1	muscleblind like splicing regulator 1	GO:0030326 embryonic limb morphogenesis;GO:0045445 myoblast differentiation;GO:0035113 embryonic appendage morphogenesis			Cytosol;Nucleoplasm(Supported)				0.0	0.0	0.0	0.0	0.0	0.0	0.0	0.0	0.0	0.0	0.0	0.0	0.0	0.0	0.0	0.0	0.0	0.0	0.0	0.0
ENSG00000070669	440	ensembl_gene_id	H. sapiens	440	H. sapiens	ASNS	asparagine synthetase (glutamine-hydrolyzing)	GO:0070981 L-asparagine biosynthetic process;GO:0070982 L-asparagine metabolic process;GO:0006529 asparagine biosynthetic process		Enzymes/ENZYME proteins/Ligase	Cytosol(Validated)	L-Aspartic Acid (Protein homodimerization activity);L-Glutamic Acid (Protein homodimerization activity);Adenosine triphosphate (Protein homodimerization activity);L-Asparagine (Protein homodimerization activity)		(M5922)HALLMARK UNFOLDED PROTEIN RESPONSE; (M5941)HALLMARK UV RESPONSE UP; (M5924)HALLMARK MTORC1 SIGNALING	0.0	0.0	0.0	0.0	1.0	0.0	0.0	0.0	0.0	0.0	1.0	0.0	0.0	0.0	0.0	0.0	0.0	0.0	0.0	0.0
ENSG00000206149	440248	ensembl_gene_id	H. sapiens	440248	H. sapiens	HERC2P9	hect domain and RLD 2 pseudogene 9								0.0	0.0	0.0	0.0	0.0	0.0	0.0	0.0	0.0	0.0	0.0	0.0	0.0	0.0	0.0	0.0	0.0	0.0	0.0	0.0
ENSG00000177410	441951	ensembl_gene_id	H. sapiens	441951	H. sapiens	ZFAS1	ZNFX1 antisense RNA 1								0.0	0.0	0.0	0.0	0.0	0.0	0.0	0.0	0.0	0.0	0.0	0.0	0.0	0.0	0.0	0.0	0.0	0.0	0.0	0.0
ENSG00000128641	4430	ensembl_gene_id	H. sapiens	4430	H. sapiens	MYO1B	myosin IB	GO:0051017 actin filament bundle assembly;GO:0061572 actin filament bundle organization;GO:0006892 post-Golgi vesicle-mediated transport			Plasma membrane(Validated)				1.0	0.0	0.0	0.0	0.0	0.0	0.0	0.0	0.0	0.0	0.0	0.0	0.0	0.0	0.0	0.0	0.0	0.0	0.0	0.0
ENSG00000132781	4595	ensembl_gene_id	H. sapiens	4595	H. sapiens	MUTYH	mutY DNA glycosylase	GO:0045007 depurination;GO:0006285 base-excision repair, AP site formation;GO:0006298 mismatch repair			Nucleus(Supported)				0.0	1.0	0.0	0.0	0.0	0.0	0.0	0.0	0.0	0.0	0.0	0.0	0.0	0.0	0.0	0.0	0.0	0.0	0.0	0.0
ENSG00000092841	4637	ensembl_gene_id	H. sapiens	4637	H. sapiens	MYL6	myosin light chain 6	GO:0030049 muscle filament sliding;GO:0033275 actin-myosin filament sliding;GO:0070252 actin-mediated cell contraction							1.0	0.0	0.0	0.0	0.0	0.0	0.0	0.0	0.0	0.0	0.0	0.0	0.0	0.0	0.0	0.0	0.0	0.0	0.0	0.0
ENSG00000187109	4673	ensembl_gene_id	H. sapiens	4673	H. sapiens	NAP1L1	nucleosome assembly protein 1 like 1	GO:0006334 nucleosome assembly;GO:0031497 chromatin assembly;GO:0034728 nucleosome organization			Microtubules(Uncertain)			(M5925)HALLMARK E2F TARGETS; (M5926)HALLMARK MYC TARGETS V1	0.0	1.0	1.0	0.0	0.0	0.0	0.0	0.0	0.0	0.0	0.0	0.0	0.0	0.0	0.0	0.0	0.0	0.0	0.0	0.0
ENSG00000104320	4683	ensembl_gene_id	H. sapiens	4683	H. sapiens	NBN	nibrin	GO:0045190 isotype switching;GO:1904354 negative regulation of telomere capping;GO:0002204 somatic recombination of immunoglobulin genes involved in immune response			Golgi apparatus;Nucleoplasm(Approved)		(M258)PID BARD1 PATHWAY; (M84)PID ATM PATHWAY; (M46)PID ATR PATHWAY	(M5935)HALLMARK FATTY ACID METABOLISM; (M5925)HALLMARK E2F TARGETS	1.0	1.0	0.0	1.0	0.0	1.0	0.0	1.0	0.0	0.0	1.0	0.0	1.0	0.0	0.0	0.0	0.0	0.0	0.0	0.0
ENSG00000178127	4729	ensembl_gene_id	H. sapiens	4729	H. sapiens	NDUFV2	NADH:ubiquinone oxidoreductase core subunit V2	GO:0006120 mitochondrial electron transport, NADH to ubiquinone;GO:0042775 mitochondrial ATP synthesis coupled electron transport;GO:0042773 ATP synthesis coupled electron transport		Enzymes/ENZYME proteins/Oxidoreductases	Mitochondria(Supported)	NADH (Nadh dehydrogenase (ubiquinone) activity)		(M5936)HALLMARK OXIDATIVE PHOSPHORYLATION	0.0	0.0	0.0	0.0	0.0	0.0	0.0	0.0	0.0	0.0	0.0	1.0	0.0	0.0	0.0	0.0	0.0	0.0	0.0	0.0
ENSG00000069869	4734	ensembl_gene_id	H. sapiens	4734	H. sapiens	NEDD4	neural precursor cell expressed, developmentally down-regulated 4, E3 ubiquitin protein ligase	GO:0019089 transmission of virus;GO:0010768 negative regulation of transcription from RNA polymerase II promoter in response to UV-induced DNA damage;GO:0044007 dissemination or transmission of symbiont from host		Transporters/Accessory Factors Involved in Transport	Cytosol(Approved)		(M13)PID ERBB4 PATHWAY; (M70)PID PS1 PATHWAY; (M237)PID VEGFR1 2 PATHWAY	(M5948)HALLMARK BILE ACID METABOLISM	0.0	0.0	0.0	1.0	1.0	0.0	0.0	0.0	0.0	0.0	0.0	0.0	0.0	0.0	0.0	0.0	1.0	0.0	0.0	0.0
ENSG00000137601	4750	ensembl_gene_id	H. sapiens	4750	H. sapiens	NEK1	NIMA related kinase 1	GO:0018108 peptidyl-tyrosine phosphorylation;GO:0060271 cilium assembly;GO:0018212 peptidyl-tyrosine modification	NEK Ser/Thr protein kinase family	Enzymes/{ENZYME proteins/Transferases,Kinases/NEK Ser/Thr protein kinases}	Nuclear membrane;Nucleoli(Approved)		(M10154)SA G2 AND M PHASES		0.0	0.0	0.0	0.0	0.0	1.0	0.0	0.0	0.0	0.0	0.0	0.0	0.0	0.0	0.0	0.0	0.0	0.0	0.0	0.0
ENSG00000186575	4771	ensembl_gene_id	H. sapiens	4771	H. sapiens	NF2	neurofibromin 2	GO:0042524 negative regulation of tyrosine phosphorylation of Stat5 protein;GO:0042518 negative regulation of tyrosine phosphorylation of Stat3 protein;GO:0051496 positive regulation of stress fiber assembly			Cytosol;Nucleus;Plasma membrane(Validated)		(M175)PID ERBB2 ERBB3 PATHWAY	(M5951)HALLMARK SPERMATOGENESIS; (M5915)HALLMARK APICAL JUNCTION	1.0	1.0	0.0	1.0	0.0	0.0	0.0	0.0	1.0	0.0	0.0	0.0	0.0	0.0	0.0	0.0	0.0	0.0	1.0	1.0
ENSG00000170322	4798	ensembl_gene_id	H. sapiens	4798	H. sapiens	NFRKB	nuclear factor related to kappaB binding protein	GO:0016579 protein deubiquitination;GO:0070646 protein modification by small protein removal;GO:0006310 DNA recombination			Nucleus(Validated)				0.0	1.0	0.0	0.0	0.0	0.0	0.0	0.0	0.0	0.0	0.0	0.0	0.0	0.0	0.0	0.0	0.0	0.0	0.0	0.0
ENSG00000066136	4802	ensembl_gene_id	H. sapiens	4802	H. sapiens	NFYC	nuclear transcription factor Y subunit gamma	GO:0045944 positive regulation of transcription from RNA polymerase II promoter;GO:0045893 positive regulation of transcription, DNA-templated;GO:0006457 protein folding		Transcription factors/Other all-alpha-helical DNA-binding domains	Nucleoplasm(Supported)		(M254)PID MYC REPRESS PATHWAY; (M145)PID P53 DOWNSTREAM PATHWAY	(M5924)HALLMARK MTORC1 SIGNALING	0.0	0.0	0.0	0.0	0.0	0.0	0.0	0.0	0.0	0.0	0.0	0.0	0.0	0.0	0.0	0.0	0.0	0.0	0.0	0.0
ENSG00000070961	490	ensembl_gene_id	H. sapiens	490	H. sapiens	ATP2B1	ATPase plasma membrane Ca2+ transporting 1	GO:0071386 cellular response to corticosterone stimulus;GO:0071389 cellular response to mineralocorticoid stimulus;GO:1901660 calcium ion export		Enzymes/ENZYME proteins/Hydrolases	Plasma membrane(Supported)		(M195)PID CMYB PATHWAY	(M5942)HALLMARK UV RESPONSE DN; (M5932)HALLMARK INFLAMMATORY RESPONSE; (M5890)HALLMARK TNFA SIGNALING VIA NFKB	0.0	0.0	0.0	0.0	0.0	0.0	0.0	0.0	0.0	0.0	0.0	0.0	0.0	0.0	0.0	0.0	0.0	0.0	0.0	0.0
ENSG00000072042	51109	ensembl_gene_id	H. sapiens	51109	H. sapiens	RDH11	retinol dehydrogenase 11 (all-trans/9-cis/11-cis)	GO:0016062 adaptation of rhodopsin mediated signaling;GO:0042574 retinal metabolic process;GO:0036367 light adaption		Enzymes/ENZYME proteins/Oxidoreductases		Vitamin A (Retinol dehydrogenase activity)		(M5949)HALLMARK PEROXISOME; (M5935)HALLMARK FATTY ACID METABOLISM; (M5924)HALLMARK MTORC1 SIGNALING	0.0	0.0	0.0	0.0	1.0	0.0	0.0	0.0	0.0	0.0	0.0	0.0	0.0	0.0	0.0	0.0	1.0	0.0	0.0	0.0
ENSG00000087076	51171	ensembl_gene_id	H. sapiens	51171	H. sapiens	HSD17B14	hydroxysteroid 17-beta dehydrogenase 14	GO:0006703 estrogen biosynthetic process;GO:0008210 estrogen metabolic process;GO:0006706 steroid catabolic process						(M5908)HALLMARK ANDROGEN RESPONSE	0.0	0.0	0.0	0.0	0.0	0.0	0.0	0.0	0.0	0.0	0.0	0.0	0.0	0.0	0.0	0.0	0.0	0.0	0.0	0.0
ENSG00000114757	51555	ensembl_gene_id	H. sapiens	51555	H. sapiens	PEX5L	peroxisomal biogenesis factor 5 like	GO:0016560 protein import into peroxisome matrix, docking;GO:0016558 protein import into peroxisome matrix;GO:0043949 regulation of cAMP-mediated signaling							0.0	0.0	0.0	0.0	0.0	0.0	0.0	0.0	0.0	0.0	0.0	0.0	0.0	0.0	1.0	0.0	0.0	0.0	0.0	0.0
ENSG00000101391	51654	ensembl_gene_id	H. sapiens	51654	H. sapiens	CDK5RAP1	CDK5 regulatory subunit associated protein 1	GO:0035600 tRNA methylthiolation;GO:0045903 positive regulation of translational fidelity;GO:0045736 negative regulation of cyclin-dependent protein serine/threonine kinase activity			Mitochondria;Nuclear speckles(Approved)				0.0	0.0	0.0	1.0	0.0	0.0	0.0	0.0	0.0	0.0	1.0	0.0	0.0	0.0	0.0	0.0	0.0	0.0	0.0	0.0
ENSG00000079150	51661	ensembl_gene_id	H. sapiens	51661	H. sapiens	FKBP7	FK506 binding protein 7	GO:0000413 protein peptidyl-prolyl isomerization;GO:0018208 peptidyl-proline modification;GO:0061077 chaperone-mediated protein folding		Enzymes/ENZYME proteins/Isomerase	Endoplasmic reticulum(Supported)				0.0	0.0	0.0	0.0	0.0	0.0	0.0	0.0	0.0	0.0	0.0	0.0	0.0	0.0	0.0	0.0	0.0	0.0	0.0	0.0
ENSG00000197857	51710	ensembl_gene_id	H. sapiens	51710	H. sapiens	ZNF44	zinc finger protein 44	GO:0006355 regulation of transcription, DNA-templated;GO:1903506 regulation of nucleic acid-templated transcription;GO:0006351 transcription, DNA-templated		Transcription factors/Zinc-coordinating DNA-binding domains	Cytosol;Microtubules;Nucleoplasm(Approved)				0.0	0.0	0.0	0.0	0.0	0.0	0.0	0.0	0.0	0.0	0.0	0.0	0.0	0.0	0.0	0.0	0.0	0.0	0.0	0.0
ENSG00000112357	5191	ensembl_gene_id	H. sapiens	5191	H. sapiens	PEX7	peroxisomal biogenesis factor 7	GO:0008611 ether lipid biosynthetic process;GO:0046504 glycerol ether biosynthetic process;GO:0016558 protein import into peroxisome matrix		Transporters/Primary Active Transporters				(M5948)HALLMARK BILE ACID METABOLISM	0.0	0.0	0.0	0.0	0.0	0.0	0.0	0.0	0.0	0.0	0.0	0.0	0.0	0.0	1.0	0.0	0.0	0.0	0.0	0.0
ENSG00000142655	5195	ensembl_gene_id	H. sapiens	5195	H. sapiens	PEX14	peroxisomal biogenesis factor 14	GO:0044721 protein import into peroxisome matrix, substrate release;GO:1901094 negative regulation of protein homotetramerization;GO:0016561 protein import into peroxisome matrix, translocation		Transporters/Primary Active Transporters	Peroxisomes(Validated)Nucleoli fibrillar center(Approved)			(M5949)HALLMARK PEROXISOME; (M5942)HALLMARK UV RESPONSE DN; (M5905)HALLMARK ADIPOGENESIS	0.0	0.0	0.0	0.0	0.0	0.0	1.0	1.0	0.0	0.0	0.0	1.0	0.0	0.0	1.0	0.0	0.0	0.0	0.0	0.0
ENSG00000152556	5213	ensembl_gene_id	H. sapiens	5213	H. sapiens	PFKM	phosphofructokinase, muscle	GO:0093001 glycolysis from storage polysaccharide through glucose-1-phosphate;GO:0061622 glycolytic process through glucose-1-phosphate;GO:0061621 canonical glycolysis		Enzymes/ENZYME proteins/Transferases	Endoplasmic reticulum(Approved)		(M66)PID MYC ACTIV PATHWAY	(M5948)HALLMARK BILE ACID METABOLISM; (M5909)HALLMARK MYOGENESIS	0.0	0.0	0.0	0.0	0.0	0.0	0.0	0.0	0.0	0.0	0.0	0.0	1.0	0.0	0.0	0.0	0.0	0.0	0.0	0.0
ENSG00000164219	5229	ensembl_gene_id	H. sapiens	5229	H. sapiens	PGGT1B	protein geranylgeranyltransferase type I subunit beta	GO:0051771 negative regulation of nitric-oxide synthase biosynthetic process;GO:0018344 protein geranylgeranylation;GO:0051769 regulation of nitric-oxide synthase biosynthetic process		Enzymes/ENZYME proteins/Transferases	Cytosol;Endoplasmic reticulum;Nucleoplasm(Approved)	4-[(5-{[4-(3-CHLOROPHENYL)-3-OXOPIPERAZIN-1-YL]METHYL}-1H-IMIDAZOL-1-YL)METHYL]BENZONITRILE (Zinc ion binding);GERANYLGERANYL DIPHOSPHATE (Zinc ion binding);2-[METHYL-(5-GERANYL-4-METHYL-PENT-3-ENYL)-AMINO]-ETHYL-DIPHOSPHATE (Zinc ion binding)			0.0	0.0	0.0	0.0	0.0	0.0	0.0	0.0	0.0	0.0	0.0	0.0	0.0	0.0	0.0	0.0	0.0	0.0	0.0	0.0
ENSG00000143393	5298	ensembl_gene_id	H. sapiens	5298	H. sapiens	PI4KB	phosphatidylinositol 4-kinase beta	GO:0046854 phosphatidylinositol phosphorylation;GO:0006661 phosphatidylinositol biosynthetic process;GO:0046834 lipid phosphorylation		Enzymes/ENZYME proteins/Transferases	Golgi apparatus(Supported)		(M160)PID AVB3 INTEGRIN PATHWAY		0.0	0.0	0.0	0.0	0.0	0.0	0.0	0.0	0.0	0.0	0.0	0.0	0.0	0.0	0.0	0.0	0.0	0.0	0.0	0.0
ENSG00000160298	54058	ensembl_gene_id	H. sapiens	54058	H. sapiens	C21orf58	chromosome 21 open reading frame 58				Nucleoplasm(Supported)Nuclear bodies(Approved)				0.0	0.0	0.0	0.0	0.0	0.0	0.0	0.0	0.0	0.0	0.0	0.0	0.0	0.0	0.0	0.0	0.0	0.0	0.0	0.0
ENSG00000101868	5422	ensembl_gene_id	H. sapiens	5422	H. sapiens	POLA1	DNA polymerase alpha 1, catalytic subunit	GO:0006272 leading strand elongation;GO:0006269 DNA replication, synthesis of RNA primer;GO:0006273 lagging strand elongation		Enzymes/ENZYME proteins/Transferases	Nucleoplasm(Supported)Cytosol(Approved)	Cladribine (Protein kinase binding);Clofarabine (Protein kinase binding);Fludarabine (Protein kinase binding);Nelarabine (Protein kinase binding)	(M40)PID E2F PATHWAY	(M5898)HALLMARK DNA REPAIR	0.0	1.0	0.0	0.0	0.0	1.0	0.0	0.0	0.0	0.0	1.0	0.0	1.0	0.0	0.0	0.0	0.0	0.0	0.0	0.0
ENSG00000070501	5423	ensembl_gene_id	H. sapiens	5423	H. sapiens	POLB	DNA polymerase beta	GO:0071707 immunoglobulin heavy chain V-D-J recombination;GO:0006286 base-excision repair, base-free sugar-phosphate removal;GO:0006288 base-excision repair, DNA ligation		Enzymes/ENZYME proteins/Transferases	Vesicles(Approved)	Cytarabine (Microtubule binding);2'-Deoxyadenosine 5'-Triphosphate (Microtubule binding);(1S)-1,2,3,4-TETRAHYDRO-BENZO[C]PHENANTHRENE-2,3,4-TRIOL (Microtubule binding)		(M5898)HALLMARK DNA REPAIR	0.0	1.0	0.0	0.0	1.0	0.0	0.0	0.0	0.0	0.0	0.0	0.0	1.0	0.0	0.0	0.0	0.0	0.0	0.0	0.0
ENSG00000166479	54495	ensembl_gene_id	H. sapiens	54495	H. sapiens	TMX3	thioredoxin related transmembrane protein 3	GO:0018171 peptidyl-cysteine oxidation;GO:0018158 protein oxidation;GO:0002576 platelet degranulation		Enzymes/ENZYME proteins/Isomerase					0.0	0.0	0.0	0.0	0.0	0.0	0.0	0.0	0.0	0.0	0.0	0.0	0.0	0.0	0.0	0.0	0.0	0.0	0.0	0.0
ENSG00000088826	54498	ensembl_gene_id	H. sapiens	54498	H. sapiens	SMOX	spermine oxidase	GO:0046208 spermine catabolic process;GO:0006598 polyamine catabolic process;GO:0008215 spermine metabolic process		Enzymes/ENZYME proteins/Oxidoreductases	Nuclear membrane;Nucleoplasm(Supported)Vesicles(Approved)	Spermine (Spermine:oxygen oxidoreductase (spermidine-forming) activity)		(M5934)HALLMARK XENOBIOTIC METABOLISM; (M5945)HALLMARK HEME METABOLISM	0.0	0.0	0.0	0.0	0.0	0.0	0.0	0.0	0.0	0.0	0.0	0.0	0.0	0.0	0.0	0.0	0.0	0.0	0.0	0.0
ENSG00000128923	54629	ensembl_gene_id	H. sapiens	54629	H. sapiens	MINDY2	MINDY lysine 48 deubiquitinase 2	GO:0071108 protein K48-linked deubiquitination;GO:0016579 protein deubiquitination;GO:0070646 protein modification by small protein removal			Nucleoplasm(Validated)				0.0	0.0	0.0	0.0	0.0	0.0	0.0	0.0	0.0	0.0	0.0	0.0	0.0	0.0	0.0	0.0	0.0	0.0	0.0	0.0
ENSG00000112033	5467	ensembl_gene_id	H. sapiens	5467	H. sapiens	PPARD	peroxisome proliferator activated receptor delta	GO:0043415 positive regulation of skeletal muscle tissue regeneration;GO:0032966 negative regulation of collagen biosynthetic process;GO:0014842 regulation of skeletal muscle satellite cell proliferation		Nuclear receptors;Transcription factors/Zinc-coordinating DNA-binding domains		Icosapent (Zinc ion binding);Treprostinil (Zinc ion binding);Sulindac (Zinc ion binding);Bezafibrate (Zinc ion binding);Heptyl-Beta-D-Glucopyranoside (Zinc ion binding);(11E)-OCTADEC-11-ENOIC ACID (Zinc ion binding);GFT505 (Zinc ion binding);KD3010 (Zinc	(M162)PID RXR VDR PATHWAY; (M70)PID PS1 PATHWAY	(M5903)HALLMARK NOTCH SIGNALING; (M5895)HALLMARK WNT BETA CATENIN SIGNALING; (M5934)HALLMARK XENOBIOTIC METABOLISM	0.0	0.0	0.0	1.0	0.0	0.0	0.0	0.0	1.0	0.0	0.0	0.0	0.0	0.0	0.0	0.0	0.0	0.0	1.0	0.0
ENSG00000196262	5478	ensembl_gene_id	H. sapiens	5478	H. sapiens	PPIA	peptidylprolyl isomerase A	GO:0019064 fusion of virus membrane with host plasma membrane;GO:0039663 membrane fusion involved in viral entry into host cell;GO:0019061 uncoating of virus		Enzymes/ENZYME proteins/Isomerase		Cyclosporine (Virion binding);L-Proline (Virion binding);(3r)-1-Acetyl-3-Methylpiperidine (Virion binding);Ethyl Oxo(Piperidin-1-Yl)Acetate (Virion binding);(3s,6s,9r,10r,11s,12s,13e,15e,18s,21s)-18-{(1e,3e,7s,8s)-9-[(2s,3r,4s,5s,6r,9s,11s)-9-Ethyl-4-Hydr		(M5924)HALLMARK MTORC1 SIGNALING; (M5926)HALLMARK MYC TARGETS V1; (M5937)HALLMARK GLYCOLYSIS	0.0	0.0	0.0	0.0	0.0	0.0	0.0	0.0	0.0	0.0	0.0	0.0	1.0	0.0	0.0	0.0	0.0	0.0	0.0	0.0
ENSG00000011258	54799	ensembl_gene_id	H. sapiens	54799	H. sapiens	MBTD1	mbt domain containing 1	GO:0048706 embryonic skeletal system development;GO:0016569 covalent chromatin modification;GO:0001501 skeletal system development			Cytosol;Nucleus(Approved)				0.0	0.0	1.0	0.0	0.0	0.0	0.0	0.0	0.0	0.0	0.0	0.0	0.0	0.0	0.0	0.0	0.0	0.0	0.0	0.0
ENSG00000119844	54812	ensembl_gene_id	H. sapiens	54812	H. sapiens	AFTPH	aftiphilin	GO:0015031 protein transport;GO:0015833 peptide transport;GO:0042886 amide transport			Cytosol;Golgi apparatus;Vesicles(Supported)				0.0	0.0	0.0	0.0	0.0	0.0	0.0	0.0	0.0	0.0	0.0	0.0	0.0	0.0	0.0	0.0	0.0	0.0	0.0	0.0
ENSG00000070269	54916	ensembl_gene_id	H. sapiens	54916	H. sapiens	TMEM260	transmembrane protein 260				Cytosol;Focal adhesion sites;Nucleus(Approved)				0.0	0.0	0.0	0.0	0.0	0.0	0.0	0.0	0.0	0.0	0.0	0.0	0.0	0.0	0.0	0.0	0.0	0.0	0.0	0.0
ENSG00000140987	54925	ensembl_gene_id	H. sapiens	54925	H. sapiens	ZSCAN32	zinc finger and SCAN domain containing 32	GO:0006357 regulation of transcription from RNA polymerase II promoter;GO:0006366 transcription from RNA polymerase II promoter;GO:0006355 regulation of transcription, DNA-templated		Transcription factors/Zinc-coordinating DNA-binding domains	Nucleoplasm(Approved)				0.0	0.0	0.0	0.0	0.0	0.0	0.0	0.0	0.0	0.0	0.0	0.0	0.0	0.0	0.0	0.0	0.0	0.0	0.0	0.0
ENSG00000172530	54971	ensembl_gene_id	H. sapiens	54971	H. sapiens	BANP	BTG3 associated nuclear protein	GO:0042177 negative regulation of protein catabolic process;GO:1901796 regulation of signal transduction by p53 class mediator;GO:0072331 signal transduction by p53 class mediator			Nuclear bodies;Nucleoplasm(Supported)				0.0	0.0	1.0	0.0	0.0	0.0	0.0	0.0	0.0	0.0	0.0	0.0	0.0	0.0	0.0	0.0	0.0	0.0	0.0	0.0
ENSG00000198000	55035	ensembl_gene_id	H. sapiens	55035	H. sapiens	NOL8	nucleolar protein 8	GO:1902570 protein localization to nucleolus;GO:0034504 protein localization to nucleus;GO:0006364 rRNA processing			Nucleoli(Supported)			(M5939)HALLMARK P53 PATHWAY	0.0	0.0	0.0	0.0	0.0	0.0	0.0	0.0	0.0	0.0	0.0	0.0	0.0	0.0	0.0	0.0	0.0	0.0	0.0	0.0
ENSG00000116191	55103	ensembl_gene_id	H. sapiens	55103	H. sapiens	RALGPS2	Ral GEF with PH domain and SH3 binding motif 2	GO:0032485 regulation of Ral protein signal transduction;GO:0032484 Ral protein signal transduction;GO:0046578 regulation of Ras protein signal transduction			Cytosol;Nucleoplasm(Uncertain)				0.0	0.0	0.0	0.0	0.0	0.0	0.0	0.0	0.0	0.0	0.0	0.0	0.0	1.0	0.0	0.0	0.0	0.0	0.0	0.0
ENSG00000114120	55186	ensembl_gene_id	H. sapiens	55186	H. sapiens	SLC25A36	solute carrier family 25 member 36	GO:1990519 mitochondrial pyrimidine nucleotide import;GO:0006864 pyrimidine nucleotide transport;GO:1901679 nucleotide transmembrane transport		Transporters/Electrochemical Potential-driven transporters	Cytosol;Mitochondria;Nucleus(Approved)				0.0	0.0	0.0	0.0	0.0	0.0	0.0	0.0	0.0	0.0	0.0	0.0	0.0	0.0	0.0	0.0	0.0	0.0	0.0	0.0
ENSG00000048707	55187	ensembl_gene_id	H. sapiens	55187	H. sapiens	VPS13D	vacuolar protein sorting 13 homolog D				Cytosol;Nucleoplasm;Vesicles(Approved)				0.0	0.0	0.0	0.0	0.0	0.0	0.0	0.0	0.0	0.0	0.0	0.0	0.0	0.0	0.0	0.0	0.0	0.0	0.0	0.0
ENSG00000163939	55193	ensembl_gene_id	H. sapiens	55193	H. sapiens	PBRM1	polybromo 1	GO:0006338 chromatin remodeling;GO:0007067 mitotic nuclear division;GO:0016569 covalent chromatin modification		Transcription factors/Other all-alpha-helical DNA-binding domains	Nucleoplasm(Supported)				0.0	0.0	1.0	0.0	0.0	1.0	0.0	0.0	0.0	0.0	0.0	0.0	0.0	0.0	0.0	0.0	0.0	0.0	0.0	0.0
ENSG00000140525	55215	ensembl_gene_id	H. sapiens	55215	H. sapiens	FANCI	Fanconi anemia complementation group I	GO:0007095 mitotic G2 DNA damage checkpoint;GO:0044818 mitotic G2/M transition checkpoint;GO:0031572 G2 DNA damage checkpoint			Nucleoplasm(Validated)		(M1)PID FANCONI PATHWAY		0.0	1.0	0.0	0.0	0.0	0.0	0.0	0.0	0.0	0.0	1.0	0.0	1.0	0.0	0.0	0.0	0.0	0.0	0.0	0.0
ENSG00000138658	55345	ensembl_gene_id	H. sapiens	55345	H. sapiens	ZGRF1	zinc finger GRF-type containing 1				Cytosol(Approved)				0.0	0.0	0.0	0.0	0.0	0.0	0.0	0.0	0.0	0.0	0.0	0.0	0.0	0.0	0.0	0.0	0.0	0.0	0.0	0.0
ENSG00000203721	554279	ensembl_gene_id	H. sapiens	554279	H. sapiens	LINC00862	long intergenic non-protein coding RNA 862								0.0	0.0	0.0	0.0	0.0	0.0	0.0	0.0	0.0	0.0	0.0	0.0	0.0	0.0	0.0	0.0	0.0	0.0	0.0	0.0
ENSG00000130827	55558	ensembl_gene_id	H. sapiens	55558	H. sapiens	PLXNA3	plexin A3	GO:0048843 negative regulation of axon extension involved in axon guidance;GO:0021612 facial nerve structural organization;GO:0021785 branchiomotor neuron axon guidance			Cell Junctions;Plasma membrane(Supported)Vesicles(Approved)		(M5880)NABA ECM AFFILIATED; (M5885)NABA MATRISOME ASSOCIATED; (M5889)NABA MATRISOME		1.0	0.0	0.0	1.0	0.0	0.0	0.0	1.0	1.0	0.0	0.0	0.0	0.0	1.0	0.0	0.0	0.0	0.0	0.0	1.0
ENSG00000124357	55577	ensembl_gene_id	H. sapiens	55577	H. sapiens	NAGK	N-acetylglucosamine kinase	GO:0006051 N-acetylmannosamine metabolic process;GO:0006050 mannosamine metabolic process;GO:0019262 N-acetylneuraminate catabolic process		Enzymes/ENZYME proteins/Transferases	Cytosol;Nucleus(Approved)	N-Acetyl-D-glucosamine (N-acylmannosamine kinase activity)		(M5891)HALLMARK HYPOXIA	0.0	0.0	0.0	0.0	0.0	0.0	0.0	0.0	0.0	0.0	0.0	0.0	0.0	0.0	0.0	0.0	0.0	0.0	0.0	0.0
ENSG00000033030	55596	ensembl_gene_id	H. sapiens	55596	H. sapiens	ZCCHC8	zinc finger CCHC-type containing 8	GO:0000398 mRNA splicing, via spliceosome;GO:0000377 RNA splicing, via transesterification reactions with bulged adenosine as nucleophile;GO:0000375 RNA splicing, via transesterification reactions			Nucleoplasm(Validated)Nuclear bodies(Approved)				0.0	0.0	0.0	0.0	0.0	0.0	0.0	0.0	0.0	0.0	0.0	0.0	0.0	0.0	0.0	0.0	0.0	0.0	0.0	0.0
ENSG00000186654	55615	ensembl_gene_id	H. sapiens	55615	H. sapiens	PRR5	proline rich 5	GO:0031295 T cell costimulation;GO:0014068 positive regulation of phosphatidylinositol 3-kinase signaling;GO:0038203 TORC2 signaling					(M121)PID MTOR 4PATHWAY		0.0	0.0	0.0	0.0	0.0	0.0	0.0	0.0	0.0	0.0	0.0	0.0	0.0	0.0	0.0	0.0	0.0	0.0	0.0	0.0
ENSG00000100796	55671	ensembl_gene_id	H. sapiens	55671	H. sapiens	PPP4R3A	protein phosphatase 4 regulatory subunit 3A				Nucleoplasm(Supported)				0.0	0.0	0.0	0.0	0.0	0.0	0.0	0.0	0.0	0.0	0.0	0.0	0.0	0.0	0.0	0.0	0.0	0.0	0.0	0.0
ENSG00000120008	55717	ensembl_gene_id	H. sapiens	55717	H. sapiens	WDR11	WD repeat domain 11				Cytosol;Microtubules(Approved)				0.0	0.0	0.0	0.0	0.0	0.0	0.0	0.0	0.0	0.0	0.0	0.0	0.0	0.0	0.0	0.0	0.0	0.0	0.0	0.0
ENSG00000112697	55754	ensembl_gene_id	H. sapiens	55754	H. sapiens	TMEM30A	transmembrane protein 30A	GO:0070863 positive regulation of protein exit from endoplasmic reticulum;GO:0070861 regulation of protein exit from endoplasmic reticulum;GO:0045332 phospholipid translocation		Transporters/Accessory Factors Involved in Transport	Mitochondria(Supported)				0.0	0.0	0.0	1.0	0.0	0.0	0.0	0.0	0.0	0.0	0.0	0.0	0.0	0.0	0.0	0.0	0.0	0.0	0.0	0.0
ENSG00000151092	55768	ensembl_gene_id	H. sapiens	55768	H. sapiens	NGLY1	N-glycanase 1	GO:0006515 misfolded or incompletely synthesized protein catabolic process;GO:0006516 glycoprotein catabolic process;GO:0006517 protein deglycosylation		Enzymes/ENZYME proteins/Hydrolases			(M3468)NABA ECM REGULATORS; (M5885)NABA MATRISOME ASSOCIATED; (M5889)NABA MATRISOME	(M5908)HALLMARK ANDROGEN RESPONSE	0.0	0.0	0.0	0.0	0.0	0.0	0.0	0.0	0.0	0.0	0.0	0.0	0.0	0.0	0.0	0.0	0.0	0.0	0.0	0.0
ENSG00000076770	55796	ensembl_gene_id	H. sapiens	55796	H. sapiens	MBNL3	muscleblind like splicing regulator 3	GO:0045662 negative regulation of myoblast differentiation;GO:0045661 regulation of myoblast differentiation;GO:0051148 negative regulation of muscle cell differentiation			Golgi apparatus;Vesicles(Approved)				0.0	0.0	0.0	0.0	0.0	0.0	0.0	0.0	0.0	0.0	0.0	0.0	0.0	0.0	0.0	0.0	0.0	0.0	0.0	0.0
ENSG00000016864	55830	ensembl_gene_id	H. sapiens	55830	H. sapiens	GLT8D1	glycosyltransferase 8 domain containing 1	GO:0000271 polysaccharide biosynthetic process;GO:0016051 carbohydrate biosynthetic process;GO:0005976 polysaccharide metabolic process			Mitochondria(Approved)				0.0	0.0	0.0	0.0	0.0	0.0	0.0	0.0	0.0	0.0	0.0	0.0	0.0	0.0	0.0	0.0	0.0	0.0	0.0	0.0
ENSG00000172785	55871	ensembl_gene_id	H. sapiens	55871	H. sapiens	CBWD1	COBW domain containing 1				Plasma membrane(Approved)				0.0	0.0	0.0	0.0	0.0	0.0	0.0	0.0	0.0	0.0	0.0	0.0	0.0	0.0	0.0	0.0	0.0	0.0	0.0	0.0
ENSG00000005483	55904	ensembl_gene_id	H. sapiens	55904	H. sapiens	KMT2E	lysine methyltransferase 2E	GO:0006306 DNA methylation;GO:0030218 erythrocyte differentiation;GO:0034968 histone lysine methylation		Enzymes/ENZYME proteins/Transferases					0.0	0.0	1.0	0.0	0.0	0.0	0.0	0.0	0.0	0.0	1.0	0.0	0.0	0.0	0.0	0.0	0.0	0.0	0.0	0.0
ENSG00000076984	5609	ensembl_gene_id	H. sapiens	5609	H. sapiens	MAP2K7	mitogen-activated protein kinase kinase 7	GO:0007257 activation of JUN kinase activity;GO:0032212 positive regulation of telomere maintenance via telomerase;GO:1904355 positive regulation of telomere capping	STE Ser/Thr protein kinase family	Enzymes/{ENZYME proteins/Transferases,Kinases/STE Ser/Thr protein kinases}	Cytosol;Golgi apparatus;Plasma membrane(Approved)		(M267)PID ANTHRAX PATHWAY; (M7871)ST GRANULE CELL SURVIVAL PATHWAY; (M69)PID REELIN PATHWAY		1.0	0.0	0.0	0.0	1.0	0.0	0.0	0.0	0.0	0.0	0.0	0.0	1.0	0.0	0.0	0.0	0.0	0.0	0.0	0.0
ENSG00000213865	56260	ensembl_gene_id	H. sapiens	56260	H. sapiens	C8orf44	chromosome 8 open reading frame 44				Nucleoplasm(Validated)				0.0	0.0	0.0	0.0	0.0	0.0	0.0	0.0	0.0	0.0	0.0	0.0	0.0	0.0	0.0	0.0	0.0	0.0	0.0	0.0
ENSG00000107281	56654	ensembl_gene_id	H. sapiens	56654	H. sapiens	NPDC1	neural proliferation, differentiation and control 1				Cytosol;Nucleus(Approved)				0.0	0.0	0.0	0.0	0.0	0.0	0.0	0.0	0.0	0.0	0.0	0.0	0.0	0.0	0.0	0.0	0.0	0.0	0.0	0.0
ENSG00000070950	56852	ensembl_gene_id	H. sapiens	56852	H. sapiens	RAD18	RAD18, E3 ubiquitin protein ligase	GO:0042769 DNA damage response, detection of DNA damage;GO:0006513 protein monoubiquitination;GO:0051865 protein autoubiquitination			Nuclear bodies;Nucleoplasm(Validated)				0.0	1.0	0.0	0.0	1.0	1.0	0.0	0.0	0.0	0.0	0.0	0.0	0.0	0.0	0.0	0.0	0.0	0.0	0.0	0.0
ENSG00000134278	56907	ensembl_gene_id	H. sapiens	56907	H. sapiens	SPIRE1	spire type actin nucleation factor 1	GO:0070649 formin-nucleated actin cable assembly;GO:0040038 polar body extrusion after meiotic divisions;GO:0030046 parallel actin filament bundle assembly			Cytosol(Supported)Nucleoplasm(Uncertain)				1.0	0.0	0.0	0.0	0.0	1.0	1.0	0.0	0.0	0.0	0.0	1.0	0.0	0.0	0.0	0.0	0.0	0.0	0.0	0.0
ENSG00000168958	56947	ensembl_gene_id	H. sapiens	56947	H. sapiens	MFF	mitochondrial fission factor	GO:0090314 positive regulation of protein targeting to membrane;GO:1900063 regulation of peroxisome organization;GO:0090200 positive regulation of release of cytochrome c from mitochondria			Mitochondria(Supported)				1.0	0.0	0.0	1.0	0.0	1.0	0.0	0.0	0.0	0.0	0.0	0.0	0.0	0.0	1.0	0.0	0.0	0.0	0.0	0.0
ENSG00000152784	56978	ensembl_gene_id	H. sapiens	56978	H. sapiens	PRDM8	PR/SET domain 8	GO:0014003 oligodendrocyte development;GO:0048709 oligodendrocyte differentiation;GO:0021782 glial cell development		Transcription factors/Zinc-coordinating DNA-binding domains	Nuclear bodies(Approved)				0.0	0.0	0.0	0.0	0.0	0.0	0.0	0.0	0.0	0.0	0.0	0.0	0.0	0.0	0.0	0.0	0.0	0.0	1.0	0.0
ENSG00000146828	56996	ensembl_gene_id	H. sapiens	56996	H. sapiens	SLC12A9	solute carrier family 12 member 9	GO:1902476 chloride transmembrane transport;GO:0071805 potassium ion transmembrane transport;GO:0098661 inorganic anion transmembrane transport		Transporters/Electrochemical Potential-driven transporters					0.0	0.0	0.0	0.0	0.0	0.0	0.0	0.0	0.0	0.0	0.0	0.0	0.0	0.0	0.0	0.0	0.0	0.0	0.0	0.0
ENSG00000163050	56997	ensembl_gene_id	H. sapiens	56997	H. sapiens	COQ8A	coenzyme Q8A	GO:0006744 ubiquinone biosynthetic process;GO:0006743 ubiquinone metabolic process;GO:1901663 quinone biosynthetic process	Atypical: ADCK protein kinase family	Enzymes/Kinases/Atypical kinases	Mitochondria(Supported)			(M5956)HALLMARK KRAS SIGNALING DN; (M5939)HALLMARK P53 PATHWAY	0.0	0.0	0.0	0.0	0.0	0.0	0.0	0.0	0.0	0.0	0.0	0.0	0.0	0.0	0.0	0.0	0.0	0.0	0.0	0.0
ENSG00000163660	57018	ensembl_gene_id	H. sapiens	57018	H. sapiens	CCNL1	cyclin L1	GO:1901409 positive regulation of phosphorylation of RNA polymerase II C-terminal domain;GO:0045737 positive regulation of cyclin-dependent protein serine/threonine kinase activity;GO:1901407 regulation of phosphorylation of RNA polymerase II C-terminal d			Nuclear bodies;Nucleoplasm(Supported)			(M5890)HALLMARK TNFA SIGNALING VIA NFKB	0.0	0.0	0.0	0.0	0.0	0.0	0.0	0.0	0.0	0.0	0.0	0.0	0.0	0.0	0.0	0.0	0.0	0.0	0.0	0.0
ENSG00000114698	57088	ensembl_gene_id	H. sapiens	57088	H. sapiens	PLSCR4	phospholipid scramblase 4	GO:0017121 phospholipid scrambling;GO:0071222 cellular response to lipopolysaccharide;GO:0097035 regulation of membrane lipid distribution			Nuclear bodies;Nucleoplasm(Approved)				0.0	0.0	0.0	0.0	0.0	0.0	0.0	0.0	0.0	0.0	0.0	0.0	0.0	0.0	0.0	0.0	0.0	0.0	0.0	0.0
ENSG00000000457	57147	ensembl_gene_id	H. sapiens	57147	H. sapiens	SCYL3	SCY1 like pseudokinase 3	GO:0016477 cell migration;GO:0048870 cell motility;GO:0051674 localization of cell	Other	Enzymes/Kinases	Microtubules;Nuclear bodies(Uncertain)				0.0	0.0	0.0	0.0	0.0	0.0	0.0	0.0	0.0	0.0	0.0	0.0	0.0	0.0	0.0	0.0	0.0	0.0	0.0	0.0
ENSG00000178761	57184	ensembl_gene_id	H. sapiens	57184	H. sapiens	FAM219B	family with sequence similarity 219 member B				Golgi apparatus;Nucleoplasm(Approved)				0.0	0.0	0.0	0.0	0.0	0.0	0.0	0.0	0.0	0.0	0.0	0.0	0.0	0.0	0.0	0.0	0.0	0.0	0.0	0.0
ENSG00000112414	57211	ensembl_gene_id	H. sapiens	57211	H. sapiens	ADGRG6	adhesion G protein-coupled receptor G6	GO:0010579 positive regulation of adenylate cyclase activity involved in G-protein coupled receptor signaling pathway;GO:0010578 regulation of adenylate cyclase activity involved in G-protein coupled receptor signaling pathway;GO:0045762 positive regulati		G-protein coupled receptors/{Family 2 (B) receptors,GPCRs excl olfactory receptors}					0.0	0.0	0.0	0.0	0.0	0.0	0.0	0.0	0.0	0.0	0.0	0.0	0.0	0.0	0.0	0.0	0.0	0.0	1.0	0.0
ENSG00000135317	57231	ensembl_gene_id	H. sapiens	57231	H. sapiens	SNX14	sorting nexin 14	GO:0097352 autophagosome maturation;GO:0097576 vacuole fusion;GO:0016236 macroautophagy			Cytosol(Supported)			(M5947)HALLMARK IL2 STAT5 SIGNALING	0.0	0.0	0.0	0.0	0.0	0.0	0.0	0.0	0.0	0.0	0.0	0.0	0.0	0.0	0.0	0.0	0.0	0.0	0.0	0.0
ENSG00000124209	57403	ensembl_gene_id	H. sapiens	57403	H. sapiens	RAB22A	RAB22A, member RAS oncogene family	GO:0097494 regulation of vesicle size;GO:0007032 endosome organization;GO:0032535 regulation of cellular component size			Centrosome(Uncertain)			(M5910)HALLMARK PROTEIN SECRETION	1.0	0.0	0.0	0.0	0.0	0.0	0.0	0.0	0.0	0.0	0.0	0.0	0.0	0.0	0.0	0.0	0.0	0.0	0.0	0.0
ENSG00000169398	5747	ensembl_gene_id	H. sapiens	5747	H. sapiens	PTK2	protein tyrosine kinase 2	GO:0060396 growth hormone receptor signaling pathway;GO:2000060 positive regulation of protein ubiquitination involved in ubiquitin-dependent protein catabolic process;GO:0051893 regulation of focal adhesion assembly	Tyr protein kinase family	Enzymes/{ENZYME proteins/Transferases,Kinases/Tyr protein kinases}	Cytosol;Focal adhesion sites;Vesicles(Supported)	7-PYRIDIN-2-YL-N-(3,4,5-TRIMETHOXYPHENYL)-7H-PYRROLO[2,3-D]PYRIMIDIN-2-AMINE (Signal transducer activity);2-({5-CHLORO-2-[(2-METHOXY-4-MORPHOLIN-4-YLPHENYL)AMINO]PYRIMIDIN-4-YL}AMINO)-N-METHYLBENZAMIDE (Signal transducer activity)	(M273)PID EPHA2 FWD PATHWAY; (M15743)ST GA12 PATHWAY; (M125)PID IGF1 PATHWAY	(M5944)HALLMARK ANGIOGENESIS; (M5902)HALLMARK APOPTOSIS; (M5915)HALLMARK APICAL JUNCTION	1.0	0.0	0.0	1.0	0.0	0.0	1.0	1.0	1.0	0.0	0.0	1.0	0.0	1.0	0.0	0.0	0.0	0.0	0.0	0.0
ENSG00000243156	57553	ensembl_gene_id	H. sapiens	57553	H. sapiens	MICAL3	microtubule associated monooxygenase, calponin and LIM domain containing 3	GO:0030042 actin filament depolymerization;GO:0051261 protein depolymerization;GO:0043624 cellular protein complex disassembly			Nucleoplasm(Validated)Cytosol;Plasma membrane(Uncertain)				1.0	0.0	0.0	0.0	0.0	1.0	0.0	0.0	0.0	0.0	0.0	0.0	0.0	0.0	0.0	0.0	0.0	0.0	0.0	0.0
ENSG00000113369	57561	ensembl_gene_id	H. sapiens	57561	H. sapiens	ARRDC3	arrestin domain containing 3	GO:0031651 negative regulation of heat generation;GO:0090327 negative regulation of locomotion involved in locomotory behavior;GO:0071879 positive regulation of adrenergic receptor signaling pathway							0.0	0.0	0.0	0.0	0.0	0.0	0.0	0.0	1.0	0.0	0.0	0.0	0.0	0.0	0.0	0.0	0.0	0.0	0.0	0.0
ENSG00000130158	57572	ensembl_gene_id	H. sapiens	57572	H. sapiens	DOCK6	dedicator of cytokinesis 6	GO:0007596 blood coagulation;GO:0007599 hemostasis;GO:0043547 positive regulation of GTPase activity			Cytosol(Supported)		(M83)PID CDC42 REG PATHWAY; (M241)PID RAC1 REG PATHWAY		0.0	0.0	0.0	0.0	0.0	0.0	0.0	0.0	0.0	0.0	0.0	0.0	0.0	1.0	0.0	0.0	0.0	0.0	0.0	0.0
ENSG00000107036	57589	ensembl_gene_id	H. sapiens	57589	H. sapiens	RIC1	RIC1 homolog, RAB6A GEF complex partner 1	GO:1903363 negative regulation of cellular protein catabolic process;GO:0042177 negative regulation of protein catabolic process;GO:0042147 retrograde transport, endosome to Golgi							0.0	0.0	0.0	0.0	0.0	0.0	0.0	0.0	0.0	0.0	0.0	0.0	0.0	1.0	0.0	0.0	0.0	0.0	0.0	0.0
ENSG00000066084	57609	ensembl_gene_id	H. sapiens	57609	H. sapiens	DIP2B	disco interacting protein 2 homolog B	GO:0008152 metabolic process;GO:0008150 biological_process			Endoplasmic reticulum(Approved)				0.0	0.0	0.0	0.0	0.0	0.0	0.0	0.0	0.0	0.0	0.0	0.0	0.0	0.0	0.0	0.0	0.0	0.0	0.0	0.0
ENSG00000163945	57654	ensembl_gene_id	H. sapiens	57654	H. sapiens	UVSSA	UV stimulated scaffold protein A	GO:0006283 transcription-coupled nucleotide-excision repair;GO:0006289 nucleotide-excision repair;GO:0009411 response to UV			Nucleoplasm(Approved)				0.0	1.0	0.0	0.0	1.0	0.0	0.0	0.0	0.0	0.0	0.0	0.0	0.0	0.0	0.0	0.0	0.0	0.0	0.0	0.0
ENSG00000148143	58499	ensembl_gene_id	H. sapiens	58499	H. sapiens	ZNF462	zinc finger protein 462	GO:0043392 negative regulation of DNA binding;GO:0051101 regulation of DNA binding;GO:0051100 negative regulation of binding		Transcription factors/Zinc-coordinating DNA-binding domains	Nucleoplasm(Approved)				0.0	0.0	1.0	0.0	0.0	0.0	0.0	0.0	0.0	0.0	0.0	0.0	0.0	0.0	0.0	0.0	0.0	0.0	0.0	0.0
ENSG00000140463	585	ensembl_gene_id	H. sapiens	585	H. sapiens	BBS4	Bardet-Biedl syndrome 4	GO:0038108 negative regulation of appetite by leptin-mediated signaling pathway;GO:0060296 regulation of cilium beat frequency involved in ciliary motility;GO:0032099 negative regulation of appetite			Cytosol(Supported)				1.0	0.0	0.0	1.0	0.0	1.0	1.0	1.0	1.0	0.0	0.0	1.0	1.0	1.0	0.0	0.0	0.0	0.0	0.0	1.0
ENSG00000152942	5884	ensembl_gene_id	H. sapiens	5884	H. sapiens	RAD17	RAD17 checkpoint clamp loader component	GO:0033314 mitotic DNA replication checkpoint;GO:0044818 mitotic G2/M transition checkpoint;GO:0000076 DNA replication checkpoint			Nucleoplasm(Validated)		(M84)PID ATM PATHWAY; (M46)PID ATR PATHWAY; (M1)PID FANCONI PATHWAY	(M5951)HALLMARK SPERMATOGENESIS	0.0	1.0	0.0	0.0	0.0	1.0	0.0	0.0	0.0	0.0	1.0	0.0	1.0	0.0	0.0	0.0	0.0	0.0	0.0	0.0
ENSG00000185187	59307	ensembl_gene_id	H. sapiens	59307	H. sapiens	SIGIRR	single Ig and TIR domain containing	GO:0031665 negative regulation of lipopolysaccharide-mediated signaling pathway;GO:0045079 negative regulation of chemokine biosynthetic process;GO:0031664 regulation of lipopolysaccharide-mediated signaling pathway			Cytosol;Nucleoli fibrillar center(Approved)				0.0	0.0	0.0	0.0	0.0	0.0	0.0	0.0	0.0	0.0	0.0	0.0	0.0	0.0	0.0	0.0	0.0	0.0	0.0	0.0
ENSG00000215883	606495	ensembl_gene_id	H. sapiens	606495	H. sapiens	CYB5RL	cytochrome b5 reductase like	GO:0015701 bicarbonate transport;GO:0015711 organic anion transport;GO:0006820 anion transport		Enzymes/ENZYME proteins/Oxidoreductases	Nucleoplasm(Validated)				0.0	0.0	0.0	0.0	0.0	0.0	0.0	0.0	0.0	0.0	0.0	0.0	0.0	0.0	0.0	0.0	0.0	0.0	0.0	0.0
ENSG00000116691	60672	ensembl_gene_id	H. sapiens	60672	H. sapiens	MIIP	migration and invasion inhibitory protein	GO:0010972 negative regulation of G2/M transition of mitotic cell cycle;GO:1902750 negative regulation of cell cycle G2/M phase transition;GO:0010389 regulation of G2/M transition of mitotic cell cycle			Cytosol;Nucleoplasm(Approved)				0.0	0.0	0.0	0.0	0.0	0.0	0.0	0.0	1.0	0.0	1.0	0.0	0.0	0.0	0.0	0.0	0.0	0.0	0.0	0.0
ENSG00000176697	627	ensembl_gene_id	H. sapiens	627	H. sapiens	BDNF	brain derived neurotrophic factor	GO:0031550 positive regulation of brain-derived neurotrophic factor receptor signaling pathway;GO:0048672 positive regulation of collateral sprouting;GO:0031548 regulation of brain-derived neurotrophic factor receptor signaling pathway			Mitochondria;Nuclear speckles(Supported)	CX717 (Neurotrophin trkb receptor binding)	(M142)PID AJDISS 2PATHWAY; (M100)PID SHP2 PATHWAY; (M187)PID TRKR PATHWAY	(M5942)HALLMARK UV RESPONSE DN; (M5930)HALLMARK EPITHELIAL MESENCHYMAL TRANSITION	1.0	0.0	0.0	1.0	0.0	0.0	0.0	0.0	0.0	0.0	0.0	0.0	0.0	0.0	0.0	0.0	0.0	0.0	0.0	0.0
ENSG00000137266	63027	ensembl_gene_id	H. sapiens	63027	H. sapiens	SLC22A23	solute carrier family 22 member 23	GO:0015711 organic anion transport;GO:0006820 anion transport;GO:0055085 transmembrane transport		Transporters/Electrochemical Potential-driven transporters	Cytosol;Nucleoplasm;Vesicles(Approved)				0.0	0.0	0.0	0.0	0.0	0.0	0.0	0.0	0.0	0.0	0.0	0.0	0.0	0.0	0.0	0.0	0.0	0.0	0.0	0.0
ENSG00000124788	6310	ensembl_gene_id	H. sapiens	6310	H. sapiens	ATXN1	ataxin 1	GO:0051168 nuclear export;GO:0006913 nucleocytoplasmic transport;GO:0045892 negative regulation of transcription, DNA-templated			Cytosol;Nucleoli;Nucleus(Supported)			(M5949)HALLMARK PEROXISOME; (M5948)HALLMARK BILE ACID METABOLISM; (M5942)HALLMARK UV RESPONSE DN	0.0	0.0	0.0	0.0	0.0	0.0	0.0	0.0	0.0	0.0	0.0	0.0	0.0	0.0	0.0	0.0	0.0	0.0	0.0	0.0
ENSG00000196876	6334	ensembl_gene_id	H. sapiens	6334	H. sapiens	SCN8A	sodium voltage-gated channel alpha subunit 8	GO:0019228 neuronal action potential;GO:0086010 membrane depolarization during action potential;GO:0042552 myelination		Transporters/Transporter channels and pores;Voltage-gated ion channels/Voltage-Gated Sodium Channels	Vesicles(Supported)Cell Junctions(Uncertain)	Tetrodotoxin (Voltage-gated sodium channel activity)		(M5942)HALLMARK UV RESPONSE DN	0.0	0.0	0.0	0.0	0.0	0.0	0.0	0.0	0.0	0.0	0.0	0.0	0.0	0.0	0.0	0.0	0.0	0.0	1.0	0.0
ENSG00000198026	63925	ensembl_gene_id	H. sapiens	63925	H. sapiens	ZNF335	zinc finger protein 335	GO:0080182 histone H3-K4 trimethylation;GO:0051569 regulation of histone H3-K4 methylation;GO:0002052 positive regulation of neuroblast proliferation		Transcription factors/Zinc-coordinating DNA-binding domains	Nucleoplasm(Validated)				0.0	0.0	1.0	1.0	0.0	0.0	0.0	0.0	0.0	0.0	0.0	0.0	1.0	0.0	0.0	0.0	0.0	0.0	1.0	1.0
ENSG00000157020	6396	ensembl_gene_id	H. sapiens	6396	H. sapiens	SEC13	SEC13 homolog, nuclear pore and COPII coat complex component	GO:0048208 COPII vesicle coating;GO:0048207 vesicle targeting, rough ER to cis-Golgi;GO:0048199 vesicle targeting, to, from or within Golgi		Transporters/Transporter channels and pores	Nucleoplasm;Vesicles(Supported)				0.0	0.0	0.0	0.0	0.0	1.0	1.0	0.0	0.0	0.0	0.0	0.0	0.0	0.0	0.0	0.0	0.0	0.0	0.0	0.0
ENSG00000137177	63971	ensembl_gene_id	H. sapiens	63971	H. sapiens	KIF13A	kinesin family member 13A	GO:0072383 plus-end-directed vesicle transport along microtubule;GO:0072386 plus-end-directed organelle transport along microtubule;GO:0047496 vesicle transport along microtubule							0.0	0.0	0.0	0.0	0.0	1.0	1.0	0.0	0.0	0.0	0.0	0.0	0.0	0.0	0.0	0.0	0.0	0.0	0.0	0.0
ENSG00000112081	6428	ensembl_gene_id	H. sapiens	6428	H. sapiens	SRSF3	serine and arginine rich splicing factor 3	GO:0006406 mRNA export from nucleus;GO:0071427 mRNA-containing ribonucleoprotein complex export from nucleus;GO:0006369 termination of RNA polymerase II transcription			Nucleoplasm(Supported)			(M5926)HALLMARK MYC TARGETS V1	0.0	0.0	0.0	0.0	0.0	0.0	0.0	0.0	0.0	0.0	0.0	0.0	0.0	0.0	0.0	0.0	0.0	0.0	0.0	0.0
ENSG00000235109	64288	ensembl_gene_id	H. sapiens	64288	H. sapiens	ZSCAN31	zinc finger and SCAN domain containing 31	GO:0006355 regulation of transcription, DNA-templated;GO:1903506 regulation of nucleic acid-templated transcription;GO:0006351 transcription, DNA-templated		Transcription factors/Zinc-coordinating DNA-binding domains	Cytosol;Nucleoplasm(Approved)				0.0	0.0	0.0	0.0	0.0	0.0	0.0	0.0	0.0	0.0	0.0	0.0	0.0	0.0	0.0	0.0	0.0	0.0	0.0	0.0
ENSG00000120318	64411	ensembl_gene_id	H. sapiens	64411	H. sapiens	ARAP3	ArfGAP with RhoGAP domain, ankyrin repeat and PH domain 3	GO:0035021 negative regulation of Rac protein signal transduction;GO:0035024 negative regulation of Rho protein signal transduction;GO:0035020 regulation of Rac protein signal transduction					(M68)PID RHOA REG PATHWAY; (M141)PID PI3KCI PATHWAY	(M5893)HALLMARK MITOTIC SPINDLE	0.0	0.0	0.0	1.0	0.0	0.0	0.0	0.0	1.0	0.0	0.0	0.0	0.0	1.0	0.0	0.0	0.0	0.0	0.0	0.0
ENSG00000125812	64412	ensembl_gene_id	H. sapiens	64412	H. sapiens	GZF1	GDNF inducible zinc finger protein 1	GO:0001658 branching involved in ureteric bud morphogenesis;GO:0060675 ureteric bud morphogenesis;GO:0072171 mesonephric tubule morphogenesis		Transcription factors/Zinc-coordinating DNA-binding domains	Nucleoli;Nucleus(Supported)				0.0	0.0	0.0	0.0	0.0	0.0	0.0	0.0	0.0	0.0	0.0	0.0	0.0	0.0	0.0	0.0	0.0	0.0	0.0	0.0
ENSG00000131368	64432	ensembl_gene_id	H. sapiens	64432	H. sapiens	MRPS25	mitochondrial ribosomal protein S25	GO:0070126 mitochondrial translational termination;GO:0070125 mitochondrial translational elongation;GO:0006415 translational termination		Ribosomal proteins	Mitochondria(Validated)				0.0	0.0	0.0	0.0	0.0	0.0	0.0	0.0	0.0	0.0	0.0	0.0	0.0	0.0	0.0	0.0	0.0	0.0	0.0	0.0
ENSG00000135596	64780	ensembl_gene_id	H. sapiens	64780	H. sapiens	MICAL1	microtubule associated monooxygenase, calponin and LIM domain containing 1	GO:0019417 sulfur oxidation;GO:0043154 negative regulation of cysteine-type endopeptidase activity involved in apoptotic process;GO:0030042 actin filament depolymerization							1.0	0.0	0.0	0.0	0.0	0.0	0.0	0.0	0.0	0.0	0.0	0.0	0.0	0.0	0.0	0.0	0.0	0.0	0.0	0.0
ENSG00000115421	64895	ensembl_gene_id	H. sapiens	64895	H. sapiens	PAPOLG	poly(A) polymerase gamma	GO:0006378 mRNA polyadenylation;GO:0031124 mRNA 3'-end processing;GO:0043631 RNA polyadenylation		Enzymes/ENZYME proteins/Transferases	Nucleoplasm(Validated)				0.0	0.0	0.0	0.0	0.0	0.0	0.0	0.0	0.0	0.0	0.0	0.0	0.0	0.0	0.0	0.0	0.0	0.0	0.0	0.0
ENSG00000173166	65059	ensembl_gene_id	H. sapiens	65059	H. sapiens	RAPH1	Ras association (RalGDS/AF-6) and pleckstrin homology domains 1	GO:0048675 axon extension;GO:1990138 neuron projection extension;GO:0007409 axonogenesis			Plasma membrane(Supported)Cytosol(Approved)Nuclear bodies(Uncertain)				0.0	0.0	0.0	1.0	0.0	0.0	0.0	0.0	0.0	0.0	0.0	0.0	0.0	0.0	0.0	0.0	0.0	0.0	0.0	0.0
ENSG00000079215	6507	ensembl_gene_id	H. sapiens	6507	H. sapiens	SLC1A3	solute carrier family 1 member 3	GO:0070779 D-aspartate import;GO:0070777 D-aspartate transport;GO:0051938 L-glutamate import		Transporters/Electrochemical Potential-driven transporters	Mitochondria;Nucleoli(Approved)	L-Glutamic Acid (Sodium:dicarboxylate symporter activity)			0.0	0.0	0.0	1.0	1.0	0.0	0.0	0.0	0.0	0.0	0.0	0.0	0.0	0.0	0.0	0.0	0.0	0.0	0.0	0.0
ENSG00000081760	65985	ensembl_gene_id	H. sapiens	65985	H. sapiens	AACS	acetoacetyl-CoA synthetase	GO:0032024 positive regulation of insulin secretion;GO:0071397 cellular response to cholesterol;GO:0071394 cellular response to testosterone stimulus		Enzymes/ENZYME proteins/Ligase	Vesicles(Approved)				0.0	0.0	0.0	0.0	0.0	0.0	0.0	0.0	0.0	0.0	0.0	0.0	0.0	0.0	0.0	0.0	0.0	0.0	0.0	0.0
ENSG00000115993	66008	ensembl_gene_id	H. sapiens	66008	H. sapiens	TRAK2	trafficking kinesin protein 2	GO:0098972 anterograde dendritic transport of mitochondrion;GO:0098939 dendritic transport of mitochondrion;GO:0098937 anterograde dendritic transport			Nuclear bodies;Nucleoplasm;Vesicles(Approved)			(M5945)HALLMARK HEME METABOLISM	0.0	0.0	0.0	0.0	0.0	0.0	1.0	0.0	0.0	0.0	0.0	0.0	0.0	0.0	0.0	0.0	0.0	0.0	0.0	0.0
ENSG00000197694	6709	ensembl_gene_id	H. sapiens	6709	H. sapiens	SPTAN1	spectrin alpha, non-erythrocytic 1	GO:0051693 actin filament capping;GO:0030835 negative regulation of actin filament depolymerization;GO:0030834 regulation of actin filament depolymerization			Microtubules(Supported)Vesicles(Uncertain)		(M220)PID CASPASE PATHWAY	(M5902)HALLMARK APOPTOSIS; (M5893)HALLMARK MITOTIC SPINDLE; (M5909)HALLMARK MYOGENESIS	1.0	0.0	0.0	1.0	0.0	0.0	0.0	1.0	0.0	0.0	0.0	1.0	0.0	1.0	0.0	0.0	0.0	0.0	0.0	0.0
ENSG00000106089	6804	ensembl_gene_id	H. sapiens	6804	H. sapiens	STX1A	syntaxin 1A	GO:0010807 regulation of synaptic vesicle priming;GO:0010701 positive regulation of norepinephrine secretion;GO:0016081 synaptic vesicle docking		Transporters/Transporter channels and pores					0.0	0.0	0.0	0.0	0.0	0.0	1.0	0.0	0.0	0.0	0.0	1.0	0.0	0.0	0.0	0.0	0.0	0.0	0.0	0.0
ENSG00000141384	6875	ensembl_gene_id	H. sapiens	6875	H. sapiens	TAF4B	TATA-box binding protein associated factor 4b	GO:0051123 RNA polymerase II transcriptional preinitiation complex assembly;GO:0070897 DNA-templated transcriptional preinitiation complex assembly;GO:0006368 transcription elongation from RNA polymerase II promoter			Nucleoli fibrillar center;Nucleoplasm(Supported)		(M66)PID MYC ACTIV PATHWAY		0.0	0.0	0.0	0.0	0.0	0.0	0.0	0.0	0.0	0.0	0.0	0.0	0.0	0.0	0.0	0.0	0.0	0.0	0.0	0.0
ENSG00000108788	6945	ensembl_gene_id	H. sapiens	6945	H. sapiens	MLX	MLX, MAX dimerization protein	GO:0000122 negative regulation of transcription from RNA polymerase II promoter;GO:0045892 negative regulation of transcription, DNA-templated;GO:1903507 negative regulation of nucleic acid-templated transcription		Transcription factors/Basic domains	Cytosol;Nucleoplasm(Supported)Nuclear membrane(Approved)				0.0	0.0	0.0	0.0	0.0	0.0	0.0	0.0	0.0	0.0	0.0	0.0	0.0	0.0	0.0	0.0	0.0	0.0	0.0	0.0
ENSG00000070814	6949	ensembl_gene_id	H. sapiens	6949	H. sapiens	TCOF1	treacle ribosome biogenesis factor 1	GO:0001501 skeletal system development;GO:0048731 system development;GO:0006810 transport			Nucleoli fibrillar center;Nucleus(Validated)			(M5928)HALLMARK MYC TARGETS V2	0.0	0.0	0.0	0.0	0.0	0.0	0.0	0.0	0.0	0.0	0.0	0.0	0.0	0.0	0.0	0.0	0.0	0.0	0.0	0.0
ENSG00000187079	7003	ensembl_gene_id	H. sapiens	7003	H. sapiens	TEAD1	TEA domain transcription factor 1	GO:1902895 positive regulation of pri-miRNA transcription from RNA polymerase II promoter;GO:1902893 regulation of pri-miRNA transcription from RNA polymerase II promoter;GO:0061614 pri-miRNA transcription from RNA polymerase II promoter		Transcription factors/Helix-turn-helix domains	Nucleus(Validated)Cytosol(Uncertain)				0.0	0.0	0.0	0.0	0.0	0.0	0.0	0.0	0.0	0.0	0.0	0.0	0.0	0.0	0.0	0.0	0.0	0.0	0.0	0.0
ENSG00000139644	7009	ensembl_gene_id	H. sapiens	7009	H. sapiens	TMBIM6	transmembrane BAX inhibitor motif containing 6	GO:1904721 negative regulation of mRNA endonucleolytic cleavage involved in unfolded protein response;GO:1904720 regulation of mRNA endonucleolytic cleavage involved in unfolded protein response;GO:1903895 negative regulation of IRE1-mediated unfolded pro		Transporters/Transporter channels and pores				(M5941)HALLMARK UV RESPONSE UP; (M5934)HALLMARK XENOBIOTIC METABOLISM	0.0	0.0	0.0	0.0	0.0	0.0	0.0	0.0	0.0	0.0	0.0	0.0	0.0	0.0	0.0	0.0	0.0	0.0	0.0	0.0
ENSG00000104067	7082	ensembl_gene_id	H. sapiens	7082	H. sapiens	TJP1	tight junction protein 1	GO:1901350 cell-cell signaling involved in cell-cell junction organization;GO:0090557 establishment of endothelial intestinal barrier;GO:0061028 establishment of endothelial barrier			Cell Junctions(Validated)		(M193)PID NEPHRIN NEPH1 PATHWAY; (M156)PID ECADHERIN NASCENT AJ PATHWAY	(M5896)HALLMARK TGF BETA SIGNALING; (M5942)HALLMARK UV RESPONSE DN; (M5915)HALLMARK APICAL JUNCTION	0.0	0.0	0.0	0.0	0.0	0.0	0.0	0.0	0.0	0.0	0.0	0.0	0.0	0.0	0.0	0.0	0.0	0.0	0.0	0.0
ENSG00000214063	7106	ensembl_gene_id	H. sapiens	7106	H. sapiens	TSPAN4	tetraspanin 4	GO:0006461 protein complex assembly;GO:0070271 protein complex biogenesis;GO:0071822 protein complex subunit organization						(M5915)HALLMARK APICAL JUNCTION	0.0	0.0	0.0	0.0	0.0	0.0	0.0	0.0	0.0	0.0	0.0	0.0	0.0	0.0	0.0	0.0	0.0	0.0	0.0	0.0
ENSG00000149809	7108	ensembl_gene_id	H. sapiens	7108	H. sapiens	TM7SF2	transmembrane 7 superfamily member 2	GO:0006695 cholesterol biosynthetic process;GO:1902653 secondary alcohol biosynthetic process;GO:0016126 sterol biosynthetic process		Enzymes/ENZYME proteins/Oxidoreductases	Endoplasmic reticulum(Supported)Vesicles(Approved)			(M5892)HALLMARK CHOLESTEROL HOMEOSTASIS; (M5924)HALLMARK MTORC1 SIGNALING	0.0	0.0	0.0	0.0	0.0	0.0	0.0	0.0	0.0	0.0	0.0	0.0	0.0	0.0	0.0	0.0	0.0	0.0	0.0	0.0
ENSG00000140416	7168	ensembl_gene_id	H. sapiens	7168	H. sapiens	TPM1	tropomyosin 1 (alpha)	GO:0003065 positive regulation of heart rate by epinephrine;GO:0001996 positive regulation of heart rate by epinephrine-norepinephrine;GO:1904753 negative regulation of vascular associated smooth muscle cell migration			Actin filaments;Cytosol(Approved)			(M5930)HALLMARK EPITHELIAL MESENCHYMAL TRANSITION	1.0	0.0	0.0	1.0	0.0	0.0	0.0	0.0	1.0	0.0	0.0	0.0	0.0	0.0	0.0	0.0	0.0	0.0	0.0	0.0
ENSG00000032389	7260	ensembl_gene_id	H. sapiens	7260	H. sapiens	TSSC1	tumor suppressing subtransferable candidate 1				Nucleoli;Nucleus(Supported)Intermediate filaments(Approved)				0.0	0.0	0.0	0.0	0.0	0.0	0.0	0.0	0.0	0.0	0.0	0.0	0.0	0.0	0.0	0.0	0.0	0.0	0.0	0.0
ENSG00000263006	727758	ensembl_gene_id	H. sapiens	727758	H. sapiens	ROCK1P1	Rho associated coiled-coil containing protein kinase 1 pseudogene 1								0.0	0.0	0.0	0.0	0.0	0.0	0.0	0.0	0.0	0.0	0.0	0.0	0.0	0.0	0.0	0.0	0.0	0.0	0.0	0.0
ENSG00000183474	728340	ensembl_gene_id	H. sapiens	728340	H. sapiens	GTF2H2C	GTF2H2 family member C	GO:0006289 nucleotide-excision repair;GO:0006281 DNA repair;GO:0006974 cellular response to DNA damage stimulus			Nuclear speckles(Approved)				0.0	1.0	0.0	0.0	0.0	0.0	0.0	0.0	0.0	0.0	0.0	0.0	0.0	0.0	0.0	0.0	0.0	0.0	0.0	0.0
ENSG00000154529	728577	ensembl_gene_id	H. sapiens	728577	H. sapiens	CNTNAP3B	contactin associated protein-like 3B	GO:0007155 cell adhesion;GO:0022610 biological adhesion;GO:0008150 biological_process							0.0	0.0	0.0	0.0	0.0	0.0	0.0	0.0	0.0	0.0	0.0	0.0	0.0	0.0	0.0	0.0	0.0	0.0	0.0	0.0
ENSG00000143367	7286	ensembl_gene_id	H. sapiens	7286	H. sapiens	TUFT1	tuftelin 1	GO:0030282 bone mineralization;GO:0042476 odontogenesis;GO:0031214 biomineral tissue development			Vesicles(Approved)				0.0	0.0	0.0	0.0	0.0	0.0	0.0	0.0	0.0	0.0	0.0	0.0	0.0	0.0	0.0	0.0	0.0	0.0	0.0	0.0
ENSG00000074966	7294	ensembl_gene_id	H. sapiens	7294	H. sapiens	TXK	TXK tyrosine kinase	GO:0060335 positive regulation of interferon-gamma-mediated signaling pathway;GO:0060332 positive regulation of response to interferon-gamma;GO:0007202 activation of phospholipase C activity	Tyr protein kinase family	Enzymes/{ENZYME proteins/Transferases,Kinases/Tyr protein kinases}	Vesicles(Approved)				0.0	0.0	0.0	1.0	0.0	0.0	0.0	0.0	0.0	0.0	0.0	0.0	0.0	0.0	0.0	0.0	0.0	0.0	0.0	0.0
ENSG00000204514	730051	ensembl_gene_id	H. sapiens	730051	H. sapiens	ZNF814	zinc finger protein 814	GO:0045892 negative regulation of transcription, DNA-templated;GO:1903507 negative regulation of nucleic acid-templated transcription;GO:1902679 negative regulation of RNA biosynthetic process		Transcription factors/Zinc-coordinating DNA-binding domains	Nucleus(Uncertain)				0.0	0.0	0.0	0.0	0.0	0.0	0.0	0.0	0.0	0.0	0.0	0.0	0.0	0.0	0.0	0.0	0.0	0.0	0.0	0.0
ENSG00000132388	7326	ensembl_gene_id	H. sapiens	7326	H. sapiens	UBE2G1	ubiquitin conjugating enzyme E2 G1	GO:0070534 protein K63-linked ubiquitination;GO:0070936 protein K48-linked ubiquitination;GO:0000209 protein polyubiquitination		Enzymes/ENZYME proteins/Transferases	Cytosol;Nucleoplasm(Approved)				0.0	0.0	0.0	0.0	0.0	0.0	0.0	0.0	0.0	0.0	0.0	0.0	0.0	0.0	0.0	0.0	0.0	0.0	0.0	0.0
ENSG00000112715	7422	ensembl_gene_id	H. sapiens	7422	H. sapiens	VEGFA	vascular endothelial growth factor A	GO:0090190 positive regulation of branching involved in ureteric bud morphogenesis;GO:1902336 positive regulation of retinal ganglion cell axon guidance;GO:0090189 regulation of branching involved in ureteric bud morphogenesis		RAS pathway related proteins		Bevacizumab (Vascular endothelial growth factor receptor binding);Minocycline (Vascular endothelial growth factor receptor binding);Gliclazide (Vascular endothelial growth factor receptor binding);Carvedilol (Vascular endothelial growth factor receptor bi	(M137)PID VEGF VEGFR PATHWAY; (M103)PID S1P S1P1 PATHWAY; (M118)PID INTEGRIN A9B1 PATHWAY	(M5919)HALLMARK HEDGEHOG SIGNALING; (M5944)HALLMARK ANGIOGENESIS; (M5922)HALLMARK UNFOLDED PROTEIN RESPONSE	1.0	0.0	1.0	1.0	0.0	1.0	0.0	0.0	1.0	0.0	0.0	1.0	1.0	0.0	0.0	0.0	0.0	1.0	1.0	0.0
ENSG00000167995	7439	ensembl_gene_id	H. sapiens	7439	H. sapiens	BEST1	bestrophin 1	GO:0030321 transepithelial chloride transport;GO:0050908 detection of light stimulus involved in visual perception;GO:0050962 detection of light stimulus involved in sensory perception		Transporters/Transporter channels and pores				(M5932)HALLMARK INFLAMMATORY RESPONSE	0.0	0.0	0.0	0.0	1.0	0.0	0.0	0.0	0.0	0.0	0.0	0.0	0.0	0.0	0.0	0.0	0.0	0.0	0.0	0.0
ENSG00000109685	7468	ensembl_gene_id	H. sapiens	7468	H. sapiens	NSD2	nuclear receptor binding SET domain protein 2	GO:0048298 positive regulation of isotype switching to IgA isotypes;GO:0048296 regulation of isotype switching to IgA isotypes;GO:0048290 isotype switching to IgA isotypes		Enzymes/ENZYME proteins/Transferases;Transcription factors/Other all-alpha-helical DNA-binding domains	Nucleus(Supported)			(M5901)HALLMARK G2M CHECKPOINT	0.0	1.0	1.0	0.0	0.0	1.0	0.0	0.0	0.0	0.0	0.0	0.0	0.0	0.0	0.0	0.0	0.0	0.0	0.0	0.0
ENSG00000136936	7507	ensembl_gene_id	H. sapiens	7507	H. sapiens	XPA	XPA, DNA damage recognition and repair factor	GO:0006295 nucleotide-excision repair, DNA incision, 3'-to lesion;GO:1901255 nucleotide-excision repair involved in interstrand cross-link repair;GO:0000717 nucleotide-excision repair, DNA duplex unwinding			Cytokinetic bridge;Nucleus(Approved)				1.0	1.0	0.0	1.0	1.0	0.0	0.0	0.0	0.0	0.0	0.0	1.0	0.0	0.0	0.0	0.0	0.0	0.0	0.0	0.0
ENSG00000082898	7514	ensembl_gene_id	H. sapiens	7514	H. sapiens	XPO1	exportin 1	GO:0000056 ribosomal small subunit export from nucleus;GO:0000055 ribosomal large subunit export from nucleus;GO:0000054 ribosomal subunit export from nucleus		Transporters/Transporter channels and pores	Cytosol;Nuclear membrane;Nucleoplasm;Vesicles(Validated)		(M140)PID RANBP2 PATHWAY; (M37)PID NFKAPPAB CANONICAL PATHWAY; (M30)PID HDAC CLASSII PATHWAY	(M5926)HALLMARK MYC TARGETS V1; (M5901)HALLMARK G2M CHECKPOINT; (M5925)HALLMARK E2F TARGETS	1.0	0.0	0.0	0.0	0.0	1.0	1.0	0.0	0.0	0.0	0.0	0.0	0.0	0.0	0.0	0.0	0.0	0.0	0.0	0.0
ENSG00000126215	7517	ensembl_gene_id	H. sapiens	7517	H. sapiens	XRCC3	X-ray repair cross complementing 3	GO:0090267 positive regulation of mitotic cell cycle spindle assembly checkpoint;GO:0090266 regulation of mitotic cell cycle spindle assembly checkpoint;GO:1903504 regulation of mitotic spindle checkpoint			Nucleus(Validated)		(M1)PID FANCONI PATHWAY	(M5907)HALLMARK ESTROGEN RESPONSE LATE	1.0	1.0	0.0	0.0	1.0	1.0	0.0	1.0	0.0	0.0	1.0	0.0	1.0	0.0	0.0	0.0	0.0	0.0	0.0	0.0
ENSG00000010244	7756	ensembl_gene_id	H. sapiens	7756	H. sapiens	ZNF207	zinc finger protein 207	GO:0007094 mitotic spindle assembly checkpoint;GO:0071174 mitotic spindle checkpoint;GO:0045841 negative regulation of mitotic metaphase/anaphase transition			Nucleus(Validated)				1.0	0.0	0.0	0.0	0.0	1.0	0.0	1.0	0.0	0.0	1.0	1.0	1.0	0.0	0.0	0.0	0.0	0.0	0.0	0.0
ENSG00000085644	7760	ensembl_gene_id	H. sapiens	7760	H. sapiens	ZNF213	zinc finger protein 213	GO:0006355 regulation of transcription, DNA-templated;GO:1903506 regulation of nucleic acid-templated transcription;GO:0006351 transcription, DNA-templated		Transcription factors/Zinc-coordinating DNA-binding domains	Cytosol;Nuclear membrane;Nucleus;Vesicles(Approved)				0.0	0.0	0.0	0.0	0.0	0.0	0.0	0.0	0.0	0.0	0.0	0.0	0.0	0.0	0.0	0.0	0.0	0.0	0.0	0.0
ENSG00000162194	79081	ensembl_gene_id	H. sapiens	79081	H. sapiens	LBHD1	LBH domain containing 1				Cytosol;Nucleoplasm(Approved)				0.0	0.0	0.0	0.0	0.0	0.0	0.0	0.0	0.0	0.0	0.0	0.0	0.0	0.0	0.0	0.0	0.0	0.0	0.0	0.0
ENSG00000070476	79364	ensembl_gene_id	H. sapiens	79364	H. sapiens	ZXDC	ZXD family zinc finger C	GO:0045893 positive regulation of transcription, DNA-templated;GO:1903508 positive regulation of nucleic acid-templated transcription;GO:1902680 positive regulation of RNA biosynthetic process		Transcription factors/Zinc-coordinating DNA-binding domains	Nucleoli(Supported)Vesicles(Approved)				0.0	0.0	0.0	0.0	0.0	0.0	0.0	0.0	0.0	0.0	0.0	0.0	0.0	0.0	0.0	0.0	0.0	0.0	0.0	0.0
ENSG00000144451	79582	ensembl_gene_id	H. sapiens	79582	H. sapiens	SPAG16	sperm associated antigen 16	GO:0097231 cell motility in response to calcium ion;GO:0007288 sperm axoneme assembly;GO:0051012 microtubule sliding			Cytosol;Plasma membrane(Approved)				0.0	0.0	0.0	0.0	0.0	0.0	0.0	0.0	0.0	0.0	0.0	0.0	0.0	0.0	0.0	0.0	0.0	0.0	0.0	0.0
ENSG00000152193	79596	ensembl_gene_id	H. sapiens	79596	H. sapiens	RNF219	ring finger protein 219				Cytosol;Nuclear bodies;Nucleoplasm(Approved)				0.0	0.0	0.0	0.0	0.0	0.0	0.0	0.0	0.0	0.0	0.0	0.0	0.0	0.0	0.0	0.0	0.0	0.0	0.0	0.0
ENSG00000204852	79600	ensembl_gene_id	H. sapiens	79600	H. sapiens	TCTN1	tectonic family member 1	GO:0021956 central nervous system interneuron axonogenesis;GO:0021523 somatic motor neuron differentiation;GO:1904491 protein localization to ciliary transition zone			Actin filaments;Nucleoplasm(Approved)				0.0	0.0	0.0	1.0	0.0	0.0	0.0	0.0	0.0	0.0	0.0	0.0	0.0	0.0	0.0	0.0	0.0	0.0	0.0	1.0
ENSG00000147316	79648	ensembl_gene_id	H. sapiens	79648	H. sapiens	MCPH1	microcephalin 1	GO:0071850 mitotic cell cycle arrest;GO:0021987 cerebral cortex development;GO:0021543 pallium development			Nuclear bodies;Nucleoplasm(Uncertain)				0.0	0.0	0.0	0.0	0.0	1.0	0.0	0.0	0.0	0.0	1.0	0.0	0.0	0.0	0.0	0.0	0.0	0.0	0.0	1.0
ENSG00000128915	79664	ensembl_gene_id	H. sapiens	79664	H. sapiens	ICE2	interactor of little elongation complex ELL subunit 2	GO:0042796 snRNA transcription from RNA polymerase III promoter;GO:0045945 positive regulation of transcription from RNA polymerase III promoter;GO:0042795 snRNA transcription from RNA polymerase II promoter			Nuclear bodies;Nucleoplasm(Supported)				0.0	0.0	0.0	0.0	0.0	0.0	0.0	0.0	0.0	0.0	0.0	0.0	0.0	0.0	0.0	0.0	0.0	0.0	0.0	0.0
ENSG00000083223	79670	ensembl_gene_id	H. sapiens	79670	H. sapiens	ZCCHC6	zinc finger CCHC-type containing 6	GO:0071044 histone mRNA catabolic process;GO:0008334 histone mRNA metabolic process;GO:0000956 nuclear-transcribed mRNA catabolic process		Enzymes/ENZYME proteins/Transferases	Cytosol(Supported)Nucleoplasm(Approved)				0.0	0.0	0.0	0.0	0.0	0.0	0.0	0.0	0.0	0.0	0.0	0.0	0.0	0.0	0.0	0.0	0.0	0.0	0.0	0.0
ENSG00000181396	79701	ensembl_gene_id	H. sapiens	79701	H. sapiens	OGFOD3	2-oxoglutarate and iron dependent oxygenase domain containing 3	GO:0055114 oxidation-reduction process;GO:0044710 single-organism metabolic process;GO:0008152 metabolic process			Nucleoplasm(Approved)				0.0	0.0	0.0	0.0	0.0	0.0	0.0	0.0	0.0	0.0	0.0	0.0	0.0	0.0	0.0	0.0	0.0	0.0	0.0	0.0
ENSG00000175471	79772	ensembl_gene_id	H. sapiens	79772	H. sapiens	MCTP1	multiple C2 and transmembrane domain containing 1	GO:0019722 calcium-mediated signaling;GO:0019932 second-messenger-mediated signaling;GO:0035556 intracellular signal transduction			Cytosol;Nucleoplasm(Approved)				0.0	0.0	0.0	0.0	0.0	0.0	0.0	0.0	0.0	0.0	0.0	0.0	0.0	0.0	0.0	0.0	0.0	0.0	0.0	0.0
ENSG00000152763	79819	ensembl_gene_id	H. sapiens	79819	H. sapiens	WDR78	WD repeat domain 78	GO:0002244 hematopoietic progenitor cell differentiation;GO:0030097 hemopoiesis;GO:0048534 hematopoietic or lymphoid organ development							0.0	0.0	0.0	0.0	0.0	0.0	0.0	0.0	0.0	0.0	0.0	0.0	0.0	0.0	0.0	0.0	0.0	0.0	0.0	0.0
ENSG00000123600	79828	ensembl_gene_id	H. sapiens	79828	H. sapiens	METTL8	methyltransferase like 8	GO:0032259 methylation;GO:0008152 metabolic process;GO:0008150 biological_process			Cytosol(Approved)				0.0	0.0	0.0	0.0	0.0	0.0	0.0	0.0	0.0	0.0	0.0	0.0	0.0	0.0	0.0	0.0	0.0	0.0	0.0	0.0
ENSG00000197056	79830	ensembl_gene_id	H. sapiens	79830	H. sapiens	ZMYM1	zinc finger MYM-type containing 1	GO:0006357 regulation of transcription from RNA polymerase II promoter;GO:0006366 transcription from RNA polymerase II promoter;GO:0006355 regulation of transcription, DNA-templated			Microtubule organizing center(Approved)				0.0	0.0	0.0	0.0	0.0	0.0	0.0	0.0	0.0	0.0	0.0	0.0	0.0	0.0	0.0	0.0	0.0	0.0	0.0	0.0
ENSG00000170537	79905	ensembl_gene_id	H. sapiens	79905	H. sapiens	TMC7	transmembrane channel like 7	GO:0006811 ion transport;GO:0006810 transport;GO:0051234 establishment of localization			Vesicles(Approved)				0.0	0.0	0.0	0.0	0.0	0.0	0.0	0.0	0.0	0.0	0.0	0.0	0.0	0.0	0.0	0.0	0.0	0.0	0.0	0.0
ENSG00000099219	79956	ensembl_gene_id	H. sapiens	79956	H. sapiens	ERMP1	endoplasmic reticulum metallopeptidase 1	GO:0006508 proteolysis;GO:0019538 protein metabolic process;GO:0043170 macromolecule metabolic process		Enzymes/Peptidases/Metallopeptidases	Nucleoli;Nucleus(Approved)				0.0	0.0	0.0	0.0	0.0	0.0	0.0	0.0	0.0	0.0	0.0	0.0	0.0	0.0	0.0	0.0	0.0	0.0	0.0	0.0
ENSG00000141449	80000	ensembl_gene_id	H. sapiens	80000	H. sapiens	GREB1L	growth regulation by estrogen in breast cancer 1 like				Mitochondria;Nucleoli(Approved)				0.0	0.0	0.0	0.0	0.0	0.0	0.0	0.0	0.0	0.0	0.0	0.0	0.0	0.0	0.0	0.0	0.0	0.0	0.0	0.0
ENSG00000197121	80055	ensembl_gene_id	H. sapiens	80055	H. sapiens	PGAP1	post-GPI attachment to proteins 1	GO:0016255 attachment of GPI anchor to protein;GO:0015798 myo-inositol transport;GO:0006506 GPI anchor biosynthetic process							0.0	0.0	0.0	0.0	0.0	0.0	0.0	0.0	0.0	0.0	0.0	0.0	0.0	0.0	0.0	0.0	0.0	0.0	0.0	1.0
ENSG00000170633	80196	ensembl_gene_id	H. sapiens	80196	H. sapiens	RNF34	ring finger protein 34	GO:2001271 negative regulation of cysteine-type endopeptidase activity involved in execution phase of apoptosis;GO:2001270 regulation of cysteine-type endopeptidase activity involved in execution phase of apoptosis;GO:2000374 regulation of oxygen metaboli			Nuclear bodies;Nucleoplasm(Supported)				0.0	0.0	0.0	0.0	0.0	0.0	0.0	0.0	0.0	0.0	0.0	0.0	0.0	0.0	0.0	0.0	0.0	0.0	0.0	0.0
ENSG00000120685	80209	ensembl_gene_id	H. sapiens	80209	H. sapiens	PROSER1	proline and serine rich 1				Cytosol;Nucleus(Approved)				0.0	0.0	0.0	0.0	0.0	0.0	0.0	0.0	0.0	0.0	0.0	0.0	0.0	0.0	0.0	0.0	0.0	0.0	0.0	0.0
ENSG00000130402	81	ensembl_gene_id	H. sapiens	81	H. sapiens	ACTN4	actinin alpha 4	GO:0032417 positive regulation of sodium:proton antiporter activity;GO:0032415 regulation of sodium:proton antiporter activity;GO:2000651 positive regulation of sodium ion transmembrane transporter activity			Cytosol;Nuclear bodies(Supported)		(M186)PID PDGFRB PATHWAY	(M5915)HALLMARK APICAL JUNCTION; (M5893)HALLMARK MITOTIC SPINDLE	1.0	0.0	0.0	1.0	0.0	0.0	1.0	1.0	1.0	0.0	0.0	0.0	0.0	0.0	0.0	0.0	0.0	0.0	0.0	0.0
ENSG00000101294	81502	ensembl_gene_id	H. sapiens	81502	H. sapiens	HM13	histocompatibility minor 13	GO:1904211 membrane protein proteolysis involved in retrograde protein transport, ER to cytosol;GO:0030970 retrograde protein transport, ER to cytosol;GO:0031293 membrane protein intracellular domain proteolysis		Enzymes/Peptidases/Aspartic-type peptidases	Endoplasmic reticulum(Supported)				0.0	0.0	0.0	0.0	0.0	0.0	0.0	0.0	0.0	0.0	0.0	0.0	0.0	0.0	0.0	0.0	0.0	0.0	0.0	0.0
ENSG00000058404	816	ensembl_gene_id	H. sapiens	816	H. sapiens	CAMK2B	calcium/calmodulin dependent protein kinase II beta	GO:0061003 positive regulation of dendritic spine morphogenesis;GO:0048169 regulation of long-term neuronal synaptic plasticity;GO:0061001 regulation of dendritic spine morphogenesis	CAMK Ser/Thr protein kinase family	Enzymes/{ENZYME proteins/Transferases,Kinases/CAMK Ser/Thr protein kinases}	Cell Junctions;Plasma membrane(Uncertain)	[4-({4-[(5-cyclopropyl-1H-pyrazol-3-yl)amino]-6-(methylamino)pyrimidin-2-yl}amino)phenyl]acetonitrile (Protein homodimerization activity)	(M16518)ST WNT CA2 CYCLIC GMP PATHWAY; (M20)PID P38 MKK3 6PATHWAY; (M269)PID RAS PATHWAY	(M5909)HALLMARK MYOGENESIS	0.0	0.0	0.0	1.0	0.0	0.0	0.0	0.0	0.0	0.0	0.0	0.0	0.0	1.0	0.0	0.0	0.0	0.0	0.0	0.0
ENSG00000073921	8301	ensembl_gene_id	H. sapiens	8301	H. sapiens	PICALM	phosphatidylinositol binding clathrin assembly protein	GO:1902963 negative regulation of metalloendopeptidase activity involved in amyloid precursor protein catabolic process;GO:1902961 positive regulation of aspartic-type endopeptidase activity involved in amyloid precursor protein catabolic process;GO:19029			Vesicles(Supported)			(M5945)HALLMARK HEME METABOLISM	0.0	0.0	0.0	1.0	0.0	0.0	0.0	1.0	0.0	0.0	0.0	1.0	0.0	0.0	0.0	1.0	0.0	0.0	0.0	0.0
ENSG00000153113	831	ensembl_gene_id	H. sapiens	831	H. sapiens	CAST	calpastatin	GO:2000675 negative regulation of type B pancreatic cell apoptotic process;GO:2000674 regulation of type B pancreatic cell apoptotic process;GO:0097050 type B pancreatic cell apoptotic process			Cytosol;Endoplasmic reticulum(Validated)	Calcium (Poly(a) rna binding)		(M5945)HALLMARK HEME METABOLISM	0.0	0.0	0.0	0.0	0.0	0.0	0.0	0.0	0.0	0.0	0.0	0.0	0.0	0.0	0.0	0.0	0.0	0.0	0.0	0.0
ENSG00000093009	8318	ensembl_gene_id	H. sapiens	8318	H. sapiens	CDC45	cell division cycle 45	GO:1902977 mitotic DNA replication preinitiation complex assembly;GO:0071163 DNA replication preinitiation complex assembly;GO:0031938 regulation of chromatin silencing at telomere			Cytosol;Nucleoplasm(Supported)Centrosome(Approved)			(M5901)HALLMARK G2M CHECKPOINT; (M5926)HALLMARK MYC TARGETS V1	0.0	1.0	1.0	0.0	0.0	1.0	0.0	0.0	0.0	0.0	1.0	0.0	1.0	0.0	0.0	0.0	0.0	0.0	0.0	0.0
ENSG00000130363	83861	ensembl_gene_id	H. sapiens	83861	H. sapiens	RSPH3	radial spoke 3 homolog				Cytosol;Plasma membrane;Vesicles(Approved)				0.0	0.0	0.0	0.0	0.0	0.0	0.0	0.0	0.0	0.0	0.0	0.0	0.0	0.0	0.0	0.0	0.0	0.0	0.0	0.0
ENSG00000184381	8398	ensembl_gene_id	H. sapiens	8398	H. sapiens	PLA2G6	phospholipase A2 group VI	GO:0090238 positive regulation of arachidonic acid secretion;GO:0090237 regulation of arachidonic acid secretion;GO:2000304 positive regulation of ceramide biosynthetic process		Enzymes/ENZYME proteins/Hydrolases;RAS pathway related proteins	Cytosol;Microtubule organizing center(Approved)	Quinacrine (Phospholipase a2 activity)			1.0	0.0	0.0	0.0	0.0	0.0	0.0	0.0	0.0	0.0	0.0	0.0	0.0	0.0	0.0	0.0	0.0	1.0	0.0	0.0
ENSG00000115363	84141	ensembl_gene_id	H. sapiens	84141	H. sapiens	EVA1A	eva-1 homolog A, regulator of programmed cell death	GO:0006914 autophagy;GO:0006915 apoptotic process;GO:0012501 programmed cell death			Vesicles(Supported)Plasma membrane(Approved)				0.0	0.0	0.0	0.0	0.0	0.0	0.0	0.0	0.0	0.0	0.0	0.0	0.0	0.0	0.0	0.0	0.0	0.0	0.0	0.0
ENSG00000100325	84164	ensembl_gene_id	H. sapiens	84164	H. sapiens	ASCC2	activating signal cointegrator 1 complex subunit 2	GO:0006307 DNA dealkylation involved in DNA repair;GO:0035510 DNA dealkylation;GO:0006304 DNA modification			Cytosol;Focal adhesion sites;Nucleus(Approved)				0.0	1.0	0.0	0.0	0.0	0.0	0.0	0.0	0.0	0.0	0.0	0.0	0.0	0.0	0.0	0.0	0.0	0.0	0.0	0.0
ENSG00000037757	84245	ensembl_gene_id	H. sapiens	84245	H. sapiens	MRI1	methylthioribose-1-phosphate isomerase 1	GO:0019509 L-methionine salvage from methylthioadenosine;GO:0071267 L-methionine salvage;GO:0071265 L-methionine biosynthetic process		Enzymes/ENZYME proteins/Isomerase	Cytosol;Nucleoli fibrillar center;Nucleoplasm(Supported)				0.0	0.0	0.0	0.0	0.0	0.0	0.0	0.0	0.0	0.0	0.0	0.0	0.0	0.0	0.0	0.0	0.0	0.0	0.0	0.0
ENSG00000256053	84334	ensembl_gene_id	H. sapiens	84334	H. sapiens	APOPT1	apoptogenic 1, mitochondrial	GO:0034393 positive regulation of smooth muscle cell apoptotic process;GO:0090200 positive regulation of release of cytochrome c from mitochondria;GO:0034391 regulation of smooth muscle cell apoptotic process							1.0	0.0	0.0	0.0	0.0	0.0	0.0	0.0	0.0	0.0	0.0	0.0	0.0	0.0	0.0	0.0	0.0	0.0	0.0	0.0
ENSG00000149182	84364	ensembl_gene_id	H. sapiens	84364	H. sapiens	ARFGAP2	ADP ribosylation factor GTPase activating protein 2	GO:0006890 retrograde vesicle-mediated transport, Golgi to ER;GO:0006888 ER to Golgi vesicle-mediated transport;GO:0043547 positive regulation of GTPase activity			Golgi apparatus(Supported)				0.0	0.0	0.0	0.0	0.0	0.0	0.0	0.0	0.0	0.0	0.0	0.0	0.0	1.0	0.0	0.0	0.0	0.0	0.0	0.0
ENSG00000198945	84456	ensembl_gene_id	H. sapiens	84456	H. sapiens	L3MBTL3	l(3)mbt-like 3 (Drosophila)	GO:0043249 erythrocyte maturation;GO:0048821 erythrocyte development;GO:0030225 macrophage differentiation			Nucleoli;Nucleus(Validated)				0.0	0.0	1.0	0.0	0.0	0.0	0.0	0.0	0.0	0.0	0.0	0.0	0.0	0.0	0.0	0.0	0.0	0.0	0.0	0.0
ENSG00000122591	84668	ensembl_gene_id	H. sapiens	84668	H. sapiens	FAM126A	family with sequence similarity 126 member A	GO:0046854 phosphatidylinositol phosphorylation;GO:0042552 myelination;GO:0090002 establishment of protein localization to plasma membrane			Cytosol;Plasma membrane(Supported)				0.0	0.0	0.0	0.0	0.0	0.0	0.0	0.0	0.0	0.0	0.0	0.0	0.0	0.0	0.0	0.0	0.0	0.0	1.0	0.0
ENSG00000110455	84680	ensembl_gene_id	H. sapiens	84680	H. sapiens	ACCS	1-aminocyclopropane-1-carboxylate synthase homolog (inactive)	GO:0009058 biosynthetic process;GO:0008152 metabolic process;GO:0008150 biological_process			Golgi apparatus(Approved)	Vinylglycine (Pyridoxal phosphate binding)			0.0	0.0	0.0	0.0	0.0	0.0	0.0	0.0	0.0	0.0	0.0	0.0	0.0	0.0	0.0	0.0	0.0	0.0	0.0	0.0
ENSG00000135093	84749	ensembl_gene_id	H. sapiens	84749	H. sapiens	USP30	ubiquitin specific peptidase 30	GO:0044313 protein K6-linked deubiquitination;GO:0035871 protein K11-linked deubiquitination;GO:0008053 mitochondrial fusion		Enzymes/{ENZYME proteins/Hydrolases,Peptidases/Cysteine-type peptidases}					0.0	0.0	0.0	0.0	0.0	0.0	0.0	0.0	0.0	0.0	0.0	0.0	0.0	0.0	0.0	0.0	0.0	0.0	0.0	0.0
ENSG00000232995	8490	ensembl_gene_id	H. sapiens	8490	H. sapiens	RGS5	regulator of G-protein signaling 5	GO:0008277 regulation of G-protein coupled receptor protein signaling pathway;GO:0043547 positive regulation of GTPase activity;GO:0043087 regulation of GTPase activity			Cytosol(Supported)				0.0	0.0	0.0	0.0	0.0	0.0	0.0	0.0	0.0	0.0	0.0	0.0	0.0	1.0	0.0	0.0	0.0	0.0	0.0	0.0
ENSG00000011566	8491	ensembl_gene_id	H. sapiens	8491	H. sapiens	MAP4K3	mitogen-activated protein kinase kinase kinase kinase 3	GO:0000185 activation of MAPKKK activity;GO:0032147 activation of protein kinase activity;GO:0071902 positive regulation of protein serine/threonine kinase activity	STE Ser/Thr protein kinase family	Enzymes/{ENZYME proteins/Transferases,Kinases/STE Ser/Thr protein kinases}	Centrosome(Approved)		(M128)PID TNF PATHWAY	(M5905)HALLMARK ADIPOGENESIS	0.0	0.0	0.0	0.0	1.0	0.0	0.0	0.0	0.0	0.0	0.0	0.0	0.0	0.0	0.0	0.0	0.0	0.0	0.0	0.0
ENSG00000031823	8498	ensembl_gene_id	H. sapiens	8498	H. sapiens	RANBP3	RAN binding protein 3	GO:0046604 positive regulation of mitotic centrosome separation;GO:0046602 regulation of mitotic centrosome separation;GO:0046607 positive regulation of centrosome cycle			Nucleoplasm(Validated)		(M90)PID WNT CANONICAL PATHWAY		1.0	0.0	0.0	0.0	0.0	1.0	0.0	0.0	0.0	0.0	1.0	0.0	0.0	1.0	0.0	0.0	0.0	0.0	0.0	0.0
ENSG00000134490	85019	ensembl_gene_id	H. sapiens	85019	H. sapiens	TMEM241	transmembrane protein 241	GO:0036085 GDP-fucose import into Golgi lumen;GO:0090480 purine nucleotide-sugar transmembrane transport;GO:0015783 GDP-fucose transport			Golgi apparatus;Vesicles(Approved)				0.0	0.0	0.0	0.0	0.0	0.0	0.0	0.0	0.0	0.0	0.0	0.0	0.0	0.0	0.0	0.0	0.0	0.0	0.0	0.0
ENSG00000197077	85379	ensembl_gene_id	H. sapiens	85379	H. sapiens	KIAA1671	KIAA1671				Microtubules(Approved)				0.0	0.0	0.0	0.0	0.0	0.0	0.0	0.0	0.0	0.0	0.0	0.0	0.0	0.0	0.0	0.0	0.0	0.0	0.0	0.0
ENSG00000067113	8611	ensembl_gene_id	H. sapiens	8611	H. sapiens	PLPP1	phospholipid phosphatase 1	GO:0030521 androgen receptor signaling pathway;GO:0008354 germ cell migration;GO:0030518 intracellular steroid hormone receptor signaling pathway		Enzymes/ENZYME proteins/Hydrolases	Plasma membrane(Supported)		(M7)PID FCER1 PATHWAY; (M19)PID P73PATHWAY	(M5908)HALLMARK ANDROGEN RESPONSE; (M5947)HALLMARK IL2 STAT5 SIGNALING	0.0	0.0	0.0	0.0	0.0	0.0	0.0	0.0	0.0	0.0	0.0	0.0	0.0	0.0	0.0	0.0	0.0	0.0	0.0	0.0
ENSG00000109270	8649	ensembl_gene_id	H. sapiens	8649	H. sapiens	LAMTOR3	late endosomal/lysosomal adaptor, MAPK and MTOR activator 3	GO:0000186 activation of MAPKK activity;GO:0043312 neutrophil degranulation;GO:0032008 positive regulation of TOR signaling							0.0	0.0	0.0	0.0	0.0	0.0	0.0	0.0	0.0	0.0	1.0	0.0	0.0	1.0	0.0	0.0	0.0	0.0	0.0	0.0
ENSG00000075151	8672	ensembl_gene_id	H. sapiens	8672	H. sapiens	EIF4G3	eukaryotic translation initiation factor 4 gamma 3	GO:0010507 negative regulation of autophagy;GO:0006446 regulation of translational initiation;GO:0031330 negative regulation of cellular catabolic process			Cytosol(Approved)			(M5950)HALLMARK ALLOGRAFT REJECTION	0.0	0.0	0.0	0.0	0.0	0.0	0.0	0.0	0.0	0.0	0.0	0.0	0.0	0.0	0.0	0.0	0.0	0.0	0.0	0.0
ENSG00000114423	868	ensembl_gene_id	H. sapiens	868	H. sapiens	CBLB	Cbl proto-oncogene B	GO:0007175 negative regulation of epidermal growth factor-activated receptor activity;GO:0007176 regulation of epidermal growth factor-activated receptor activity;GO:0061099 negative regulation of protein tyrosine kinase activity			Cytosol(Supported)Nucleoplasm(Approved)		(M45)PID CD40 PATHWAY; (M214)PID ERBB1 INTERNALIZATION PATHWAY; (M60)PID NFAT TFPATHWAY	(M5921)HALLMARK COMPLEMENT	0.0	0.0	0.0	0.0	0.0	0.0	0.0	0.0	0.0	0.0	0.0	0.0	0.0	0.0	0.0	0.0	0.0	0.0	0.0	0.0
ENSG00000143537	8751	ensembl_gene_id	H. sapiens	8751	H. sapiens	ADAM15	ADAM metallopeptidase domain 15	GO:1900121 negative regulation of receptor binding;GO:0001953 negative regulation of cell-matrix adhesion;GO:0060317 cardiac epithelial to mesenchymal transition		Enzymes/Peptidases/Metallopeptidases	Vesicles(Uncertain)		(M118)PID INTEGRIN A9B1 PATHWAY; (M3468)NABA ECM REGULATORS; (M5885)NABA MATRISOME ASSOCIATED	(M5915)HALLMARK APICAL JUNCTION	0.0	0.0	0.0	1.0	0.0	0.0	0.0	0.0	1.0	0.0	0.0	0.0	0.0	0.0	0.0	0.0	0.0	1.0	0.0	0.0
ENSG00000134265	8774	ensembl_gene_id	H. sapiens	8774	H. sapiens	NAPG	NSF attachment protein gamma	GO:0006891 intra-Golgi vesicle-mediated transport;GO:0050821 protein stabilization;GO:0031647 regulation of protein stability			Cytosol;Plasma membrane(Approved)			(M5910)HALLMARK PROTEIN SECRETION	0.0	0.0	0.0	0.0	0.0	0.0	0.0	0.0	0.0	0.0	0.0	0.0	0.0	0.0	0.0	0.0	0.0	0.0	0.0	0.0
ENSG00000063601	8776	ensembl_gene_id	H. sapiens	8776	H. sapiens	MTMR1	myotubularin related protein 1	GO:0046856 phosphatidylinositol dephosphorylation;GO:0006661 phosphatidylinositol biosynthetic process;GO:0046839 phospholipid dephosphorylation		Enzymes/ENZYME proteins/Hydrolases	Nucleoplasm;Plasma membrane;Vesicles(Approved)				0.0	0.0	0.0	0.0	0.0	0.0	0.0	0.0	0.0	0.0	0.0	0.0	0.0	0.0	0.0	0.0	0.0	0.0	0.0	0.0
ENSG00000132326	8864	ensembl_gene_id	H. sapiens	8864	H. sapiens	PER2	period circadian clock 2	GO:0051946 regulation of glutamate uptake involved in transmission of nerve impulse;GO:0051935 glutamate reuptake;GO:0051941 regulation of amino acid uptake involved in synaptic transmission					(M95)PID CIRCADIAN PATHWAY		1.0	0.0	1.0	1.0	0.0	0.0	0.0	0.0	0.0	0.0	0.0	0.0	0.0	0.0	0.0	0.0	0.0	0.0	0.0	0.0
ENSG00000161011	8878	ensembl_gene_id	H. sapiens	8878	H. sapiens	SQSTM1	sequestosome 1	GO:0098779 positive regulation of macromitophagy in response to mitochondrial depolarization;GO:1901526 positive regulation of macromitophagy;GO:0044130 negative regulation of growth of symbiont in host			Cytosol;Vesicles(Validated)		(M110)PID IL1 PATHWAY; (M128)PID TNF PATHWAY; (M187)PID TRKR PATHWAY	(M5923)HALLMARK PI3K AKT MTOR SIGNALING; (M5941)HALLMARK UV RESPONSE UP; (M5902)HALLMARK APOPTOSIS	1.0	0.0	0.0	0.0	0.0	0.0	0.0	0.0	0.0	0.0	0.0	0.0	0.0	0.0	0.0	0.0	0.0	0.0	0.0	0.0
ENSG00000198270	89894	ensembl_gene_id	H. sapiens	89894	H. sapiens	TMEM116	transmembrane protein 116	GO:0008150 biological_process			Microtubules;Nucleoplasm(Approved)				0.0	0.0	0.0	0.0	0.0	0.0	0.0	0.0	0.0	0.0	0.0	0.0	0.0	0.0	0.0	0.0	0.0	0.0	0.0	0.0
ENSG00000102078	9016	ensembl_gene_id	H. sapiens	9016	H. sapiens	SLC25A14	solute carrier family 25 member 14	GO:0009060 aerobic respiration;GO:0015992 proton transport;GO:0045333 cellular respiration		Transporters/Electrochemical Potential-driven transporters	Mitochondria(Approved)				0.0	0.0	0.0	0.0	0.0	0.0	0.0	0.0	0.0	0.0	0.0	0.0	0.0	0.0	0.0	0.0	0.0	0.0	0.0	0.0
ENSG00000130787	9026	ensembl_gene_id	H. sapiens	9026	H. sapiens	HIP1R	huntingtin interacting protein 1 related	GO:0034316 negative regulation of Arp2/3 complex-mediated actin nucleation;GO:1901030 positive regulation of mitochondrial outer membrane permeabilization involved in apoptotic signaling pathway;GO:0051126 negative regulation of actin nucleation			Cytosol;Plasma membrane;Vesicles(Validated)				1.0	0.0	0.0	0.0	0.0	0.0	0.0	1.0	0.0	0.0	0.0	1.0	0.0	0.0	0.0	1.0	0.0	0.0	0.0	0.0
ENSG00000142733	9064	ensembl_gene_id	H. sapiens	9064	H. sapiens	MAP3K6	mitogen-activated protein kinase kinase kinase 6	GO:0007257 activation of JUN kinase activity;GO:0043507 positive regulation of JUN kinase activity;GO:0000186 activation of MAPKK activity	STE Ser/Thr protein kinase family	Enzymes/{ENZYME proteins/Transferases,Kinases/STE Ser/Thr protein kinases}	Actin filaments;Cytosol;Nucleus;Plasma membrane(Approved)		(M20)PID P38 MKK3 6PATHWAY	(M5928)HALLMARK MYC TARGETS V2	0.0	0.0	0.0	0.0	0.0	0.0	0.0	0.0	0.0	0.0	0.0	0.0	0.0	0.0	0.0	0.0	0.0	0.0	0.0	0.0
ENSG00000129691	9070	ensembl_gene_id	H. sapiens	9070	H. sapiens	ASH2L	ASH2 like histone lysine methyltransferase complex subunit	GO:0051568 histone H3-K4 methylation;GO:1904837 beta-catenin-TCF complex assembly;GO:0034968 histone lysine methylation			Nucleoplasm;Plasma membrane(Supported)				0.0	1.0	1.0	0.0	0.0	0.0	0.0	0.0	0.0	0.0	0.0	0.0	0.0	0.0	0.0	0.0	0.0	0.0	0.0	0.0
ENSG00000161791	91010	ensembl_gene_id	H. sapiens	91010	H. sapiens	FMNL3	formin like 3	GO:0001525 angiogenesis;GO:0008360 regulation of cell shape;GO:0048514 blood vessel morphogenesis			Cytosol;Plasma membrane(Supported)Golgi apparatus;Vesicles(Approved)				1.0	0.0	0.0	1.0	0.0	0.0	0.0	0.0	0.0	0.0	0.0	0.0	0.0	0.0	0.0	0.0	0.0	0.0	0.0	0.0
ENSG00000154655	91133	ensembl_gene_id	H. sapiens	91133	H. sapiens	L3MBTL4	l(3)mbt-like 4 (Drosophila)	GO:0016569 covalent chromatin modification;GO:0006325 chromatin organization;GO:0051276 chromosome organization			Nucleoplasm;Vesicles(Approved)			(M5921)HALLMARK COMPLEMENT	0.0	0.0	1.0	0.0	0.0	0.0	0.0	0.0	0.0	0.0	0.0	0.0	0.0	0.0	0.0	0.0	0.0	0.0	0.0	0.0
ENSG00000160613	9159	ensembl_gene_id	H. sapiens	9159	H. sapiens	PCSK7	proprotein convertase subtilisin/kexin type 7	GO:0016486 peptide hormone processing;GO:0042445 hormone metabolic process;GO:0016485 protein processing		Enzymes/Peptidases/Serine-type peptidases	Nuclear membrane;Nucleoli;Nucleus(Uncertain)				0.0	0.0	0.0	0.0	0.0	0.0	0.0	0.0	0.0	0.0	0.0	0.0	0.0	0.0	0.0	0.0	0.0	0.0	0.0	0.0
ENSG00000116584	9181	ensembl_gene_id	H. sapiens	9181	H. sapiens	ARHGEF2	Rho/Rac guanine nucleotide exchange factor 2	GO:1902219 negative regulation of intrinsic apoptotic signaling pathway in response to osmotic stress;GO:0071802 negative regulation of podosome assembly;GO:1902218 regulation of intrinsic apoptotic signaling pathway in response to osmotic stress					(M69)PID REELIN PATHWAY; (M241)PID RAC1 REG PATHWAY; (M68)PID RHOA REG PATHWAY	(M5893)HALLMARK MITOTIC SPINDLE	1.0	0.0	0.0	1.0	0.0	1.0	1.0	1.0	0.0	0.0	0.0	1.0	0.0	1.0	0.0	0.0	1.0	0.0	0.0	0.0
ENSG00000121989	92	ensembl_gene_id	H. sapiens	92	H. sapiens	ACVR2A	activin A receptor type 2A	GO:0042713 sperm ejaculation;GO:0060011 Sertoli cell proliferation;GO:0032927 positive regulation of activin receptor signaling pathway	TKL Ser/Thr protein kinase family	Enzymes/{ENZYME proteins/Transferases,Kinases/TKL Ser/Thr protein kinases}	Cytosol(Approved)		(M185)PID ALK1 PATHWAY	(M5942)HALLMARK UV RESPONSE DN; (M5950)HALLMARK ALLOGRAFT REJECTION; (M5932)HALLMARK INFLAMMATORY RESPONSE	0.0	0.0	0.0	0.0	0.0	0.0	0.0	0.0	0.0	0.0	0.0	0.0	0.0	0.0	0.0	0.0	0.0	0.0	0.0	0.0
ENSG00000132950	9205	ensembl_gene_id	H. sapiens	9205	H. sapiens	ZMYM5	zinc finger MYM-type containing 5	GO:0022604 regulation of cell morphogenesis;GO:0022603 regulation of anatomical structure morphogenesis;GO:0000902 cell morphogenesis							0.0	0.0	0.0	1.0	0.0	0.0	0.0	0.0	0.0	0.0	0.0	0.0	0.0	0.0	0.0	0.0	0.0	0.0	0.0	0.0
ENSG00000124831	9208	ensembl_gene_id	H. sapiens	9208	H. sapiens	LRRFIP1	LRR binding FLII interacting protein 1	GO:0032481 positive regulation of type I interferon production;GO:0051092 positive regulation of NF-kappaB transcription factor activity;GO:0032479 regulation of type I interferon production		Transcription factors/Yet undefined DNA-binding domains	Cytosol(Supported)				0.0	0.0	0.0	0.0	0.0	0.0	0.0	0.0	0.0	0.0	0.0	0.0	0.0	0.0	0.0	0.0	0.0	0.0	0.0	0.0
ENSG00000093167	9209	ensembl_gene_id	H. sapiens	9209	H. sapiens	LRRFIP2	LRR binding FLII interacting protein 2	GO:0016055 Wnt signaling pathway;GO:0198738 cell-cell signaling by wnt;GO:1905114 cell surface receptor signaling pathway involved in cell-cell signaling		Transcription factors/Yet undefined DNA-binding domains	Actin filaments;Plasma membrane(Approved)				0.0	0.0	0.0	0.0	0.0	0.0	0.0	0.0	0.0	0.0	0.0	0.0	0.0	0.0	0.0	0.0	0.0	0.0	0.0	0.0
ENSG00000151276	9223	ensembl_gene_id	H. sapiens	9223	H. sapiens	MAGI1	membrane associated guanylate kinase, WW and PDZ domain containing 1	GO:0070997 neuron death;GO:0006461 protein complex assembly;GO:0007155 cell adhesion			Cell Junctions;Nucleoplasm(Validated)				0.0	0.0	0.0	0.0	0.0	0.0	0.0	0.0	0.0	0.0	0.0	0.0	0.0	0.0	0.0	0.0	0.0	0.0	0.0	0.0
ENSG00000205464	92270	ensembl_gene_id	H. sapiens	92270	H. sapiens	ATP6AP1L	ATPase H+ transporting accessory protein 1 like	GO:0015991 ATP hydrolysis coupled proton transport;GO:0015988 energy coupled proton transmembrane transport, against electrochemical gradient;GO:0099132 ATP hydrolysis coupled cation transmembrane transport			Cytosol;Nucleoli(Approved)				0.0	0.0	0.0	0.0	0.0	0.0	0.0	0.0	0.0	0.0	0.0	0.0	0.0	0.0	0.0	0.0	0.0	0.0	0.0	0.0
ENSG00000119185	9270	ensembl_gene_id	H. sapiens	9270	H. sapiens	ITGB1BP1	integrin subunit beta 1 binding protein 1	GO:0090051 negative regulation of cell migration involved in sprouting angiogenesis;GO:0051895 negative regulation of focal adhesion assembly;GO:1903671 negative regulation of sprouting angiogenesis			Cytosol;Nucleoplasm(Supported)			(M5949)HALLMARK PEROXISOME	1.0	0.0	0.0	1.0	0.0	1.0	0.0	1.0	1.0	0.0	0.0	0.0	0.0	1.0	0.0	0.0	0.0	0.0	0.0	0.0
ENSG00000205336	9289	ensembl_gene_id	H. sapiens	9289	H. sapiens	ADGRG1	adhesion G protein-coupled receptor G1	GO:0021819 layer formation in cerebral cortex;GO:0021801 cerebral cortex radial glia guided migration;GO:0021796 cerebral cortex regionalization		G-protein coupled receptors/{Family 2 (B) receptors,GPCRs excl olfactory receptors}				(M5919)HALLMARK HEDGEHOG SIGNALING	0.0	0.0	0.0	1.0	0.0	0.0	0.0	0.0	1.0	0.0	0.0	0.0	0.0	0.0	0.0	0.0	0.0	1.0	1.0	1.0
ENSG00000161249	93099	ensembl_gene_id	H. sapiens	93099	H. sapiens	DMKN	dermokine	GO:1903575 cornified envelope assembly;GO:0071709 membrane assembly;GO:0044091 membrane biogenesis			Cytosol;Nucleoplasm(Approved)				0.0	0.0	0.0	0.0	0.0	0.0	0.0	0.0	0.0	0.0	0.0	0.0	0.0	0.0	0.0	0.0	0.0	0.0	0.0	0.0
ENSG00000155508	9337	ensembl_gene_id	H. sapiens	9337	H. sapiens	CNOT8	CCR4-NOT transcription complex subunit 8	GO:0006977 DNA damage response, signal transduction by p53 class mediator resulting in cell cycle arrest;GO:0072431 signal transduction involved in mitotic G1 DNA damage checkpoint;GO:0031571 mitotic G1 DNA damage checkpoint		Enzymes/ENZYME proteins/Hydrolases					0.0	1.0	0.0	0.0	0.0	0.0	0.0	0.0	0.0	0.0	1.0	0.0	0.0	0.0	0.0	0.0	0.0	0.0	0.0	0.0
ENSG00000146376	93663	ensembl_gene_id	H. sapiens	93663	H. sapiens	ARHGAP18	Rho GTPase activating protein 18	GO:0030833 regulation of actin filament polymerization;GO:0008064 regulation of actin polymerization or depolymerization;GO:0030041 actin filament polymerization			Cytosol;Nuclear speckles;Plasma membrane(Approved)				1.0	0.0	0.0	1.0	0.0	0.0	0.0	0.0	1.0	0.0	0.0	1.0	0.0	1.0	0.0	0.0	0.0	0.0	0.0	0.0
ENSG00000181896	94039	ensembl_gene_id	H. sapiens	94039	H. sapiens	ZNF101	zinc finger protein 101	GO:0006355 regulation of transcription, DNA-templated;GO:1903506 regulation of nucleic acid-templated transcription;GO:0006351 transcription, DNA-templated		Transcription factors/Zinc-coordinating DNA-binding domains					0.0	0.0	0.0	0.0	0.0	0.0	0.0	0.0	0.0	0.0	0.0	0.0	0.0	0.0	0.0	0.0	0.0	0.0	0.0	0.0
ENSG00000152944	9412	ensembl_gene_id	H. sapiens	9412	H. sapiens	MED21	mediator complex subunit 21	GO:0001824 blastocyst development;GO:0019827 stem cell population maintenance;GO:0001701 in utero embryonic development			Cytosol;Nucleoli;Nucleus(Approved)				0.0	0.0	0.0	0.0	0.0	0.0	0.0	0.0	0.0	0.0	0.0	0.0	0.0	0.0	0.0	0.0	0.0	0.0	0.0	0.0
ENSG00000071054	9448	ensembl_gene_id	H. sapiens	9448	H. sapiens	MAP4K4	mitogen-activated protein kinase kinase kinase kinase 4	GO:0030033 microvillus assembly;GO:0046328 regulation of JNK cascade;GO:0032528 microvillus organization	STE Ser/Thr protein kinase family	Enzymes/{ENZYME proteins/Transferases,Kinases/STE Ser/Thr protein kinases}			(M62)PID EPHB FWD PATHWAY; (M128)PID TNF PATHWAY; (M144)PID CERAMIDE PATHWAY		0.0	0.0	0.0	0.0	0.0	0.0	0.0	0.0	0.0	0.0	0.0	0.0	0.0	0.0	0.0	0.0	0.0	0.0	0.0	0.0
ENSG00000057663	9474	ensembl_gene_id	H. sapiens	9474	H. sapiens	ATG5	autophagy related 5	GO:2000619 negative regulation of histone H4-K16 acetylation;GO:0051279 regulation of release of sequestered calcium ion into cytosol;GO:0090241 negative regulation of histone H4 acetylation			Centrosome(Approved)				1.0	0.0	1.0	1.0	0.0	0.0	0.0	1.0	0.0	0.0	0.0	0.0	1.0	0.0	0.0	0.0	0.0	0.0	0.0	0.0
ENSG00000050820	9564	ensembl_gene_id	H. sapiens	9564	H. sapiens	BCAR1	BCAR1, Cas family scaffolding protein	GO:0010595 positive regulation of endothelial cell migration;GO:0050852 T cell receptor signaling pathway;GO:0050853 B cell receptor signaling pathway			Cytosol;Plasma membrane(Approved)		(M273)PID EPHA2 FWD PATHWAY; (M11)PID PRL SIGNALING EVENTS PATHWAY; (M118)PID INTEGRIN A9B1 PATHWAY	(M5893)HALLMARK MITOTIC SPINDLE; (M5934)HALLMARK XENOBIOTIC METABOLISM	1.0	0.0	0.0	0.0	0.0	1.0	0.0	0.0	1.0	0.0	0.0	0.0	0.0	0.0	0.0	0.0	0.0	0.0	0.0	0.0
ENSG00000198752	9578	ensembl_gene_id	H. sapiens	9578	H. sapiens	CDC42BPB	CDC42 binding protein kinase beta	GO:0031532 actin cytoskeleton reorganization;GO:0031032 actomyosin structure organization;GO:0007163 establishment or maintenance of cell polarity	AGC Ser/Thr protein kinase family	Enzymes/{ENZYME proteins/Transferases,Kinases/AGC Ser/Thr protein kinases}	Cytosol;Nuclear speckles(Approved)				1.0	0.0	0.0	0.0	0.0	0.0	1.0	0.0	0.0	0.0	0.0	0.0	0.0	0.0	0.0	0.0	0.0	0.0	0.0	0.0
ENSG00000138078	9581	ensembl_gene_id	H. sapiens	9581	H. sapiens	PREPL	prolyl endopeptidase-like	GO:0006508 proteolysis;GO:0019538 protein metabolic process;GO:0043170 macromolecule metabolic process		Enzymes/Peptidases/Serine-type peptidases					0.0	0.0	0.0	0.0	0.0	0.0	0.0	0.0	0.0	0.0	0.0	0.0	0.0	0.0	0.0	0.0	0.0	0.0	0.0	0.0
ENSG00000026508	960	ensembl_gene_id	H. sapiens	960	H. sapiens	CD44	CD44 molecule (Indian blood group)	GO:1900625 positive regulation of monocyte aggregation;GO:1900623 regulation of monocyte aggregation;GO:1902166 negative regulation of intrinsic apoptotic signaling pathway in response to DNA damage by p53 class mediator		Blood group antigen proteins;CD markers	Golgi apparatus;Plasma membrane(Validated)	Hyaluronic acid (Hyalurononglucosaminidase activity)	(M11736)SA MMP CYTOKINE CONNECTION; (M63)PID AVB3 OPN PATHWAY	(M5897)HALLMARK IL6 JAK STAT3 SIGNALING; (M5902)HALLMARK APOPTOSIS; (M5947)HALLMARK IL2 STAT5 SIGNALING	0.0	1.0	0.0	0.0	0.0	0.0	0.0	0.0	0.0	0.0	0.0	0.0	0.0	0.0	0.0	0.0	0.0	0.0	0.0	0.0
ENSG00000171055	9637	ensembl_gene_id	H. sapiens	9637	H. sapiens	FEZ2	fasciculation and elongation protein zeta 2	GO:1902902 negative regulation of autophagosome assembly;GO:0016242 negative regulation of macroautophagy;GO:2000785 regulation of autophagosome assembly			Cytosol;Golgi apparatus;Nucleoli(Approved)				0.0	0.0	0.0	1.0	0.0	0.0	0.0	1.0	0.0	0.0	0.0	0.0	0.0	0.0	0.0	0.0	0.0	0.0	0.0	0.0
ENSG00000123562	9643	ensembl_gene_id	H. sapiens	9643	H. sapiens	MORF4L2	mortality factor 4 like 2	GO:0043968 histone H2A acetylation;GO:0043967 histone H4 acetylation;GO:0051155 positive regulation of striated muscle cell differentiation			Nucleus(Validated)				0.0	1.0	1.0	0.0	0.0	0.0	0.0	0.0	0.0	0.0	0.0	0.0	0.0	0.0	0.0	0.0	0.0	0.0	0.0	0.0
ENSG00000173226	9657	ensembl_gene_id	H. sapiens	9657	H. sapiens	IQCB1	IQ motif containing B1	GO:0048496 maintenance of animal organ identity;GO:0045494 photoreceptor cell maintenance;GO:0097711 ciliary basal body docking			Cytokinetic bridge;Microtubules;Mitotic spindle(Supported)				0.0	0.0	0.0	0.0	0.0	0.0	0.0	0.0	0.0	0.0	0.0	0.0	1.0	0.0	0.0	0.0	0.0	0.0	0.0	0.0
ENSG00000178104	9659	ensembl_gene_id	H. sapiens	9659	H. sapiens	PDE4DIP	phosphodiesterase 4D interacting protein	GO:0043623 cellular protein complex assembly;GO:0034622 cellular macromolecular complex assembly;GO:0006461 protein complex assembly			Golgi apparatus(Supported)			(M5909)HALLMARK MYOGENESIS	0.0	0.0	0.0	0.0	0.0	0.0	0.0	0.0	0.0	0.0	0.0	1.0	0.0	0.0	0.0	0.0	0.0	0.0	0.0	0.0
ENSG00000130254	9667	ensembl_gene_id	H. sapiens	9667	H. sapiens	SAFB2	scaffold attachment factor B2	GO:0060765 regulation of androgen receptor signaling pathway;GO:0060008 Sertoli cell differentiation;GO:0030521 androgen receptor signaling pathway			Nuclear bodies;Nucleoplasm(Supported)Vesicles(Approved)				0.0	0.0	0.0	0.0	0.0	0.0	0.0	0.0	0.0	0.0	0.0	0.0	0.0	0.0	0.0	0.0	0.0	0.0	0.0	0.0
ENSG00000128512	9732	ensembl_gene_id	H. sapiens	9732	H. sapiens	DOCK4	dedicator of cytokinesis 4	GO:1904694 negative regulation of vascular smooth muscle contraction;GO:0003056 regulation of vascular smooth muscle contraction;GO:0045906 negative regulation of vasoconstriction			Cytosol;Plasma membrane(Supported)Golgi apparatus;Nucleoli(Approved)		(M186)PID PDGFRB PATHWAY	(M5893)HALLMARK MITOTIC SPINDLE; (M5921)HALLMARK COMPLEMENT	1.0	0.0	0.0	0.0	0.0	0.0	0.0	0.0	1.0	0.0	0.0	0.0	0.0	1.0	0.0	0.0	0.0	0.0	0.0	0.0
ENSG00000134909	9743	ensembl_gene_id	H. sapiens	9743	H. sapiens	ARHGAP32	Rho GTPase activating protein 32	GO:0043547 positive regulation of GTPase activity;GO:0051056 regulation of small GTPase mediated signal transduction;GO:0043087 regulation of GTPase activity			Golgi apparatus(Supported)Nucleoli fibrillar center;Nucleoplasm(Uncertain)		(M187)PID TRKR PATHWAY		0.0	0.0	0.0	0.0	0.0	0.0	0.0	0.0	0.0	0.0	0.0	0.0	0.0	1.0	0.0	0.0	0.0	0.0	0.0	0.0
ENSG00000123146	976	ensembl_gene_id	H. sapiens	976	H. sapiens	ADGRE5	adhesion G protein-coupled receptor E5	GO:0043312 neutrophil degranulation;GO:0002283 neutrophil activation involved in immune response;GO:0043299 leukocyte degranulation		CD markers;G-protein coupled receptors/{Family 2 (B) receptors,GPCRs excl olfactory receptors};Transporters	Cytosol(Approved)				0.0	0.0	0.0	0.0	0.0	0.0	0.0	0.0	0.0	0.0	0.0	0.0	0.0	0.0	0.0	0.0	0.0	0.0	0.0	0.0
ENSG00000101337	9777	ensembl_gene_id	H. sapiens	9777	H. sapiens	TM9SF4	transmembrane 9 superfamily member 4	GO:0070863 positive regulation of protein exit from endoplasmic reticulum;GO:0070072 vacuolar proton-transporting V-type ATPase complex assembly;GO:2000010 positive regulation of protein localization to cell surface		Transporters	Mitochondria(Approved)				0.0	0.0	0.0	0.0	0.0	0.0	0.0	0.0	0.0	0.0	0.0	1.0	0.0	0.0	0.0	0.0	0.0	0.0	0.0	0.0
ENSG00000170871	9778	ensembl_gene_id	H. sapiens	9778	H. sapiens	KIAA0232	KIAA0232				Cytosol(Approved)				0.0	0.0	0.0	0.0	0.0	0.0	0.0	0.0	0.0	0.0	0.0	0.0	0.0	0.0	0.0	0.0	0.0	0.0	0.0	0.0
ENSG00000103335	9780	ensembl_gene_id	H. sapiens	9780	H. sapiens	PIEZO1	piezo type mechanosensitive ion channel component 1	GO:0033634 positive regulation of cell-cell adhesion mediated by integrin;GO:0033625 positive regulation of integrin activation;GO:0033632 regulation of cell-cell adhesion mediated by integrin		Transporters/Transporter channels and pores					1.0	0.0	0.0	0.0	0.0	0.0	0.0	0.0	0.0	0.0	0.0	1.0	0.0	0.0	0.0	0.0	0.0	0.0	0.0	0.0
ENSG00000196428	9819	ensembl_gene_id	H. sapiens	9819	H. sapiens	TSC22D2	TSC22 domain family member 2	GO:0006970 response to osmotic stress;GO:0009628 response to abiotic stimulus;GO:0006355 regulation of transcription, DNA-templated		Transcription factors/Basic domains	Cytosol(Approved)				0.0	0.0	0.0	0.0	0.0	0.0	0.0	0.0	0.0	0.0	0.0	0.0	0.0	0.0	0.0	0.0	0.0	0.0	0.0	0.0
ENSG00000119682	9870	ensembl_gene_id	H. sapiens	9870	H. sapiens	AREL1	apoptosis resistant E3 ubiquitin protein ligase 1	GO:0042787 protein ubiquitination involved in ubiquitin-dependent protein catabolic process;GO:0006511 ubiquitin-dependent protein catabolic process;GO:0019941 modification-dependent protein catabolic process							0.0	0.0	0.0	0.0	0.0	0.0	0.0	0.0	0.0	0.0	0.0	0.0	0.0	0.0	0.0	0.0	0.0	0.0	0.0	0.0
ENSG00000205758	9946	ensembl_gene_id	H. sapiens	9946	H. sapiens	CRYZL1	crystallin zeta like 1	GO:1901661 quinone metabolic process;GO:0042180 cellular ketone metabolic process;GO:0051186 cofactor metabolic process			Cytosol;Nucleoplasm(Approved)				0.0	0.0	0.0	0.0	0.0	0.0	0.0	0.0	0.0	0.0	0.0	0.0	0.0	0.0	0.0	0.0	0.0	0.0	0.0	0.0
ENSG00000158402	995	ensembl_gene_id	H. sapiens	995	H. sapiens	CDC25C	cell division cycle 25C	GO:0006977 DNA damage response, signal transduction by p53 class mediator resulting in cell cycle arrest;GO:0072431 signal transduction involved in mitotic G1 DNA damage checkpoint;GO:0031571 mitotic G1 DNA damage checkpoint		Enzymes/ENZYME proteins/Hydrolases	Nuclear speckles(Supported)		(M84)PID ATM PATHWAY; (M46)PID ATR PATHWAY; (M129)PID PLK1 PATHWAY		0.0	1.0	0.0	0.0	0.0	1.0	0.0	0.0	0.0	0.0	1.0	0.0	0.0	0.0	0.0	0.0	0.0	0.0	0.0	0.0
ENSG00000124789	9972	ensembl_gene_id	H. sapiens	9972	H. sapiens	NUP153	nucleoporin 153	GO:0075732 viral penetration into host nucleus;GO:0046832 negative regulation of RNA export from nucleus;GO:1902594 multi-organism nuclear import		Transporters/Transporter channels and pores	Nuclear membrane(Validated)		(M228)PID SMAD2 3PATHWAY	(M5925)HALLMARK E2F TARGETS	0.0	0.0	1.0	0.0	0.0	1.0	0.0	0.0	0.0	0.0	0.0	1.0	0.0	0.0	0.0	0.0	0.0	0.0	0.0	0.0
ENSG00000173653	9986	ensembl_gene_id	H. sapiens	9986	H. sapiens	RCE1	Ras converting CAAX endopeptidase 1	GO:0071586 CAAX-box protein processing;GO:0080120 CAAX-box protein maturation;GO:0016579 protein deubiquitination		Enzymes/Peptidases/Threonine-type peptidases				(M5921)HALLMARK COMPLEMENT	0.0	0.0	0.0	0.0	0.0	0.0	0.0	0.0	0.0	0.0	0.0	0.0	0.0	0.0	0.0	0.0	0.0	0.0	0.0	0.0
ENSG00000152795	9987	ensembl_gene_id	H. sapiens	9987	H. sapiens	HNRNPDL	heterogeneous nuclear ribonucleoprotein D like	GO:0006355 regulation of transcription, DNA-templated;GO:1903506 regulation of nucleic acid-templated transcription;GO:0006351 transcription, DNA-templated			Nucleoplasm(Validated)				0.0	0.0	0.0	0.0	0.0	0.0	0.0	0.0	0.0	0.0	0.0	0.0	0.0	0.0	0.0	0.0	0.0	0.0	0.0	0.0
