# Supplementary material for: MBNL1 alternative splicing isoforms play opposing roles in cancer
Source: Life Sci Alliance. 2018 Sep 7;1(5):e201800157. doi: 10.26508/lsa.201800157 (PMC6238595; doi:10.26508/lsa.201800157)
Supplement: Supplementary file 9 [file LSA-2018-00157_TableS8.xlsx]

## Sheet: Table S8 FACS quantification
	2n	>2n	4n	>4n	sum		normalized
Exp: 20170712
							2n	>2n	4n	>4n	sum
AON Scr	52.1	20.9	23.4	0.94	97.34		53.5237	21.4711	24.0394	0.965687	100
AON MBNL1	35.3	34.6	22	6.34	98.24		35.9324	35.2199	22.3941	6.45358	100
Exp: 20170724
AON Scr	47.1	17.1	29.3	3.6	97.1		48.5067	17.6107	30.1751	3.70752	100
AON MBNL1	33.2	25.9	23.1	9.65	91.85		36.1459	28.1981	25.1497	10.5063	100
Exp: 20170731
AON Scr	49.9	17.7	27.5	0.86	95.96		52.0008	18.4452	28.6578	0.896207	100
AON MBNL1	37.6	25	29.5	3.77	95.87		39.2198	26.077	30.7708	3.93241	100
							average all 3 experiments
					AON Scr		51.3438	19.1757	27.6241	1.85647	average
					AON MBNL1		37.0994	29.8317	26.1049	6.96408
					AON Scr		2.57225	2.03124	3.19575	1.60343	stdev
					AON MBNL1		1.83944	4.78533	4.26926	3.31653
				stats	multiple t test		P value	Mean1	Mean2	Difference	SE of difference	t ratio	df
					2n		0.00145615	51.3438	37.0994	14.2444	1.82574	7.80197	4
					>2n		0.0237915	19.1757	29.8317	-10.656	3.00141	3.55033	4
					4n		0.647578	27.6241	26.1049	1.51921	3.07893	0.493421	4
					>4n		0.0742351	1.85647	6.96408	-5.10761	2.12684	2.4015	4
